# Supplementary material
Source: Research Square preprint supplement (doi:10.21203/rs.3.rs-9880582/v1)
Supplement: Supplementary file 1 [file 85fc46a042790f2aab845e2f.pdf]

*Supplementary Information*

***Divergent Photochemical Remodeling of Furans***

*Da Hye Lee<sup>1,†</sup>, Sumitava Mallik<sup>1,†</sup>, Seok Yeol Yoo<sup>2</sup>, Kyungbae Kim<sup>1</sup>, and Yoonsu Park<sup>1,3,\*</sup>*

*<sup>1</sup>Department of Chemistry, Korea Advanced Institute of Science and Technology (KAIST),  
Daejeon 34141, Republic of Korea*

*<sup>2</sup>Center for Catalytic Hydrocarbon Functionalizations, Institute for Basic Science (IBS),  
Daejeon 34141, Republic of Korea*

*<sup>3</sup>InnoCORE AI Co-Research & Education for Innovative Drug (AI-CRED) Institute, KAIST,  
Daejeon 34141, Republic of Korea*

*<sup>†</sup>These authors contributed equally.*

*\*yoonsu.park@kaist.ac.kr*

**Table of Contents**

|                                                               |      |
|---------------------------------------------------------------|------|
| I. General Consideration                                      | S1   |
| II. Preparation of Starting Materials                         | S4   |
| III. General Catalytic Procedures                             | S8   |
| IV. Computational Analysis                                    | S30  |
| V. Mechanistic Studies                                        | S41  |
| VI. Crystallographic Data                                     | S46  |
| VII. NMR Spectral Copies                                      | S50  |
| VIII. Cartesian Coordinates Obtained in Computational Studies | S103 |
| IX. Vibrational Frequencies Obtained in Computational Studies | S108 |
| X. References                                                 | S111 |

## I. General Consideration

All air- and moisture-sensitive manipulations were carried out using vacuum line, Schlenk, and cannula techniques or in an inert atmosphere (nitrogen) glovebox unless otherwise noted. All glassware was stored in a pre-heated oven prior to use. The solvents used for air- and moisture-sensitive manipulations were dried and deoxygenated using literature procedures<sup>1</sup>.

2,5-dimethylfuran, 2-pentylfuran, and furan were purchased from Sigma-Aldrich or TCI chemical company and distilled over a high vacuum line before use. 3,6-di-*tert*-butyl-9-mesityl-10-methylacridin-10-ium tetrafluoroborate, hydrazine monohydrochloride, sodium benzoate, scandium (III) triflate, 2,5-diphenyl furan, benzohydrazide, diosbulbin B, and isonicotinic acid hydrazide were purchased from Sigma-Aldrich or TCI chemical company or BLD pharm and dried under high vacuum prior to use. Sodium thiosulfate pentahydrate and sodium sulfate were purchased from Samchun chemical company and dried under high vacuum prior to use. All purified starting materials were stored in an N<sub>2</sub>-filled glovebox. Hydrazine solution (1.0 M in MeCN), ethyl 3-(furan-2-yl)propanoate, and (+)-menthofuran were purchased from TCI chemical company or Sigma-Aldrich and used without further purification. Unless otherwise stated, all commercial reagents and solvents were used without additional purification.

<sup>1</sup>H NMR spectra were recorded on Bruker AVANCE III HD (400 MHz), AVANCE NEO Nanobay (400 MHz), AVANCE NEO (500 MHz) or Agilent Technologies DD2 (600 MHz) at room temperature, unless otherwise noted. Chemical shifts were quoted in parts per million (ppm) referenced to the residual solvent peak. The following abbreviations were used to describe peak splitting patterns when appropriate s = singlet, d = doublet, dd = doublet of doublet, ddd = doublet of doublet of doublet, ddt = doublet of doublet of triplet, dt = doublet of triplet, t = triplet, td = triplet of doublet, tt = triplet of triplet, ttt = triplet of triplet of triplet, appt = apparent triplet, q = quartet, p = pentet, m = multiplet, br = broad. Coupling constants, *J*, were reported in hertz (Hz). <sup>13</sup>C NMR spectra were obtained on Bruker AVANCE III HD (400 MHz), AVANCE NEO Nanobay (400 MHz), AVANCE NEO (500 MHz), or Agilent Technologies DD2 (600 MHz), fully decoupled by broadband

proton decoupling. Chemical shifts were reported in ppm referenced to the residual solvent peak.  $^{19}\text{F}$  NMR spectra were recorded on Bruker AVANCE III HD (400 MHz), AVANCE NEO Nanobay (400 MHz), or AVANCE NEO (500 MHz), and chemical shifts were reported in ppm referenced to external  $\alpha,\alpha,\alpha$ -trifluorotoluene as -63.72 ppm.

Analytical thin-layer chromatography (TLC) was performed on Merck precoated silica gel 60 F254 plates. Visualization on TLC was achieved by UV light (254 nm). Silica-gel chromatography was performed using a CombiFlash<sup>®</sup> R<sub>f</sub><sup>+</sup> system with RediSep<sup>®</sup> R<sub>f</sub> Silica columns using a proper eluent. Basic alumina ( $\text{Al}_2\text{O}_3$ ) column chromatography was performed with standard grade, Brockmann I, activated, basic, using a proper eluent. High-resolution mass spectrometry (HRMS) data were obtained using ESI method via a reversed-phase liquid chromatography system (UPLC) connected to a Waters Xevo G2-XS Q-TOF mass spectrometer, operated with MassLynx software. UV-Vis absorption spectra were recorded on a Cary 60 UV-Vis S5 spectrometer (Agilent Technologies, Santa Clara, California) by using a custom-made 10 mm cuvette fitted with a J-Young valve. The data collection for X-ray single crystal structure analysis was performed at the given temperature on a Bruker D8 QUEST diffractometer and Bruker D8 VENTURE diffractometer equipped with  $\lambda$  3.0 Mo X-ray tube ( $\lambda = 0.71073 \text{ \AA}$ ) and Photon II detector. The parabar-coated crystals were mounted on a goniometer for a diffraction experiment. The diffraction data were integrated, scaled, and reduced by using the Bruker APEX5 software. The crystal structures were solved by SHELX structure solution program and refined by full-matrix least-squares calculations with the SHELXL<sup>2,3</sup>.

## II. Preparation of Starting Materials

### Preparation of furan derivatives

3-phenylfuran<sup>4</sup>, 3-(*p*-tolyl)furan<sup>4</sup>, 3-(4-methoxyphenyl)furan<sup>4</sup>, 3-(4-fluorophenyl)furan<sup>4</sup>, 3-(4-(trifluoromethyl)phenyl)furan<sup>4</sup>, 3-(furan-3-yl)benzotrile<sup>5</sup>, 2-(furan-3-yl)pyridine<sup>4</sup>, 2-(furan-3-yl)pyrazine<sup>4</sup>, 3-(naphthalen-2-yl)furan<sup>4</sup>, 3-benzylfuran<sup>6</sup>, 2-phenylfuran<sup>4</sup>, 2-(furan-2-yl)pyridine<sup>7</sup>, 2-(furan-2-ylmethyl)isoindoline-1,3-dione<sup>8</sup>, 3,4-diphenylfuran<sup>4</sup>, 3,4-di-*p*-tolylfuran<sup>9</sup>, 2-methyl-4-phenylfuran<sup>4</sup>, and 1,3,5-tri(furan-3-yl)benzene<sup>10</sup> were synthesized according to the previously reported methods.

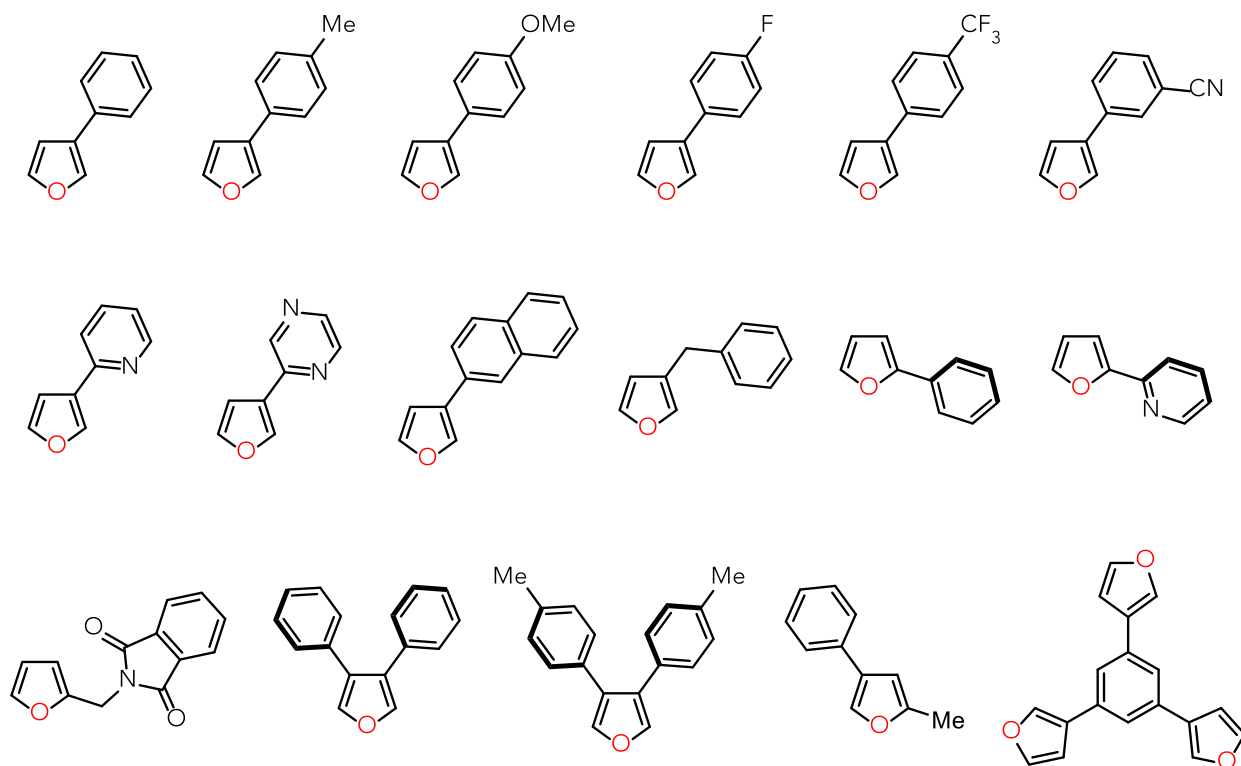

**Figure S1.** Molecular structures of the synthesized furans according to the literature methods

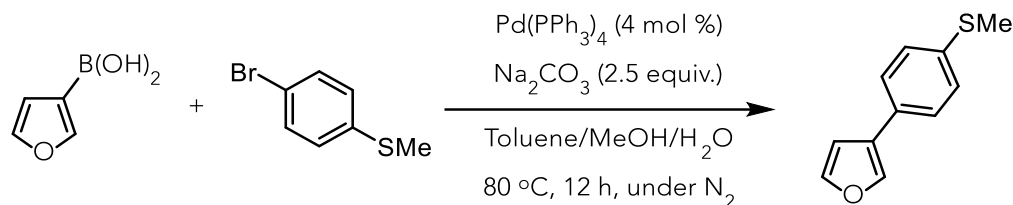

**Preparation of 3-(4-(methylthio)phenyl)furan.** A modified procedure was used based on the literature<sup>4</sup>. A 100 mL Schlenk flask was charged with a magnetic stir bar and Pd(PPh<sub>3</sub>)<sub>4</sub> (4 mol %) under N<sub>2</sub> atmosphere. A toluene (12 mL) solution of aryl bromide (5.66 mmol) was added, followed by the addition of a 2 M aqueous solution of Na<sub>2</sub>CO<sub>3</sub> (10 mL) and a solution of furan-3-boronic acid (6.5 mmol) in MeOH (3 mL). The reaction mixture was stirred at 80 °C for 12 h. Upon completion, the reaction mixture was cooled and extracted with CH<sub>2</sub>Cl<sub>2</sub> three times. The combined organic layer was washed with brine and dried over Na<sub>2</sub>SO<sub>4</sub>. The resultant was filtered and concentrated under reduced pressure. The crude mixture was purified by silica gel flash column chromatography (Eluent: *n*-hexane/EtOAc = 9:1).

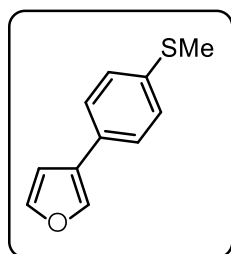

White solid (742.0 mg, 60%); **<sup>1</sup>H NMR (400 MHz, Chloroform-*d*)** δ 7.72 (dd, *J* = 1.6, 0.9 Hz, 1H), 7.48 (appt, *J* = 1.7 Hz, 1H), 7.44 – 7.38 (m, 2H), 7.32 – 7.23 (m, 2H), 6.68 (dd, *J* = 1.9, 0.9 Hz, 1H), 2.50 (s, 3H); **<sup>13</sup>C{<sup>1</sup>H} NMR (151 MHz, Chloroform-*d*)** δ 143.84, 138.44, 137.10, 129.53, 127.30, 126.41, 126.08, 108.85, 16.20; **HRMS (ESI)** *m/z* calcd. for C<sub>11</sub>H<sub>10</sub>OS [M+H]<sup>+</sup>: 191.0525, found: 191.0520.

### Preparation of photocatalyst

9-Mesityl-3,6-di-*tert*-butyl-10-mesitylacridinium tetrafluoroborate (**PC 1**) was synthesized according to the previously reported methods<sup>11</sup>.

## Neutralization of hydrazinium salts to free hydrazines

According to a procedure reported by Yoshiya Fukumoto and coworkers<sup>12</sup>, *tert*-butyl hydrazinecarboxylate hydrochloride, and *tert*-butylhydrazine hydrochloride were free-based prior to use. In brief, to the suspension of hydrazinium salt in CH<sub>2</sub>Cl<sub>2</sub> was added 2.0 equivalents of aqueous 1 M KOH solution at room temperature. After stirring for 30 min at room temperature, the resulting suspension was extracted to CH<sub>2</sub>Cl<sub>2</sub>, and the organic phase was further washed with brine, dried over sodium sulfate, and concentrated under reduced pressure to afford the desired free hydrazines.

## Preparation of hydrazine derivatives

(1*R*,2*S*,5*R*)-2-isopropyl-5-methylcyclohexyl hydrazinecarboxylate<sup>13</sup> and phenethylhydrazine<sup>14</sup> were synthesized according to previously reported methods.

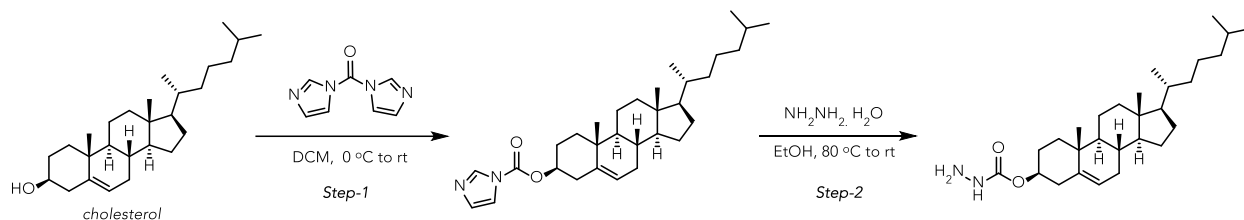

## Preparation of (3*S*,8*S*,9*S*,10*R*,13*R*,14*S*,17*R*)-10,13-dimethyl-17-((*R*)-6-methylheptan-2-yl)-2,3,4,7,8,9,10,11,12,13,14,15,16,17-tetradecahydro-1*H*-cyclopenta[*a*]phenanthren-3-yl

**hydrazinecarboxylate.** A modified procedure was used based on the literature<sup>13,15</sup>. A 50 mL Schlenk flask equipped with a magnetic stir bar was charged with cholesterol (2.5 mmol). Dichloromethane (10 mL) was added, and the reaction mixture was cooled to 0 °C. CDI (1.05 equiv.) was then added portion-wise, and the resulting solution was stirred at room temperature for 3 h. Upon completion of the reaction, the mixture was diluted with dichloromethane and washed three times with Na<sub>2</sub>CO<sub>3</sub>. The combined organic layers were washed with brine, dried

over Na<sub>2</sub>SO<sub>4</sub>, filtered, and concentrated under reduced pressure. The crude carbonate product was used for the next step without further purification.

**Step-2:** A modified procedure was used based on the literature.<sup>16</sup> A round-bottom flask was charged with the crude carbonate (2.0 mmol) was dissolved in EtOH (5 mL), treated with hydrazine hydrate (2.0 equiv.), and heated at 80 °C for 3 h. After completion, the reaction was quenched with 1 M NaOH and extracted with EtOAc (50 mL × 3). The combined organic layers were dried over Na<sub>2</sub>SO<sub>4</sub>, filtered, and concentrated under reduced pressure. Purification by silica gel column chromatography (Hexane/EtOAc = 1:1) afforded the corresponding carbazate.

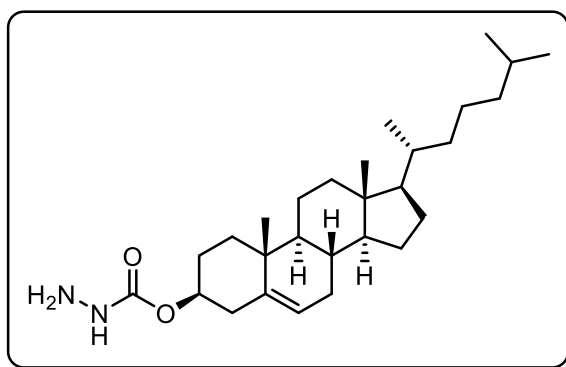

White solid (355.0 mg, 40%); **<sup>1</sup>H NMR (600 MHz, Chloroform-*d*)** δ 5.94 (s, 1H), 5.38 (dd, *J* = 5.1, 2.3 Hz, 1H), 4.54 (t, *J* = 5.2 Hz, 1H), 3.57 (br, 2H), 2.44 – 2.24 (m, 2H), 2.03 – 1.92 (m, 2H), 1.91 – 1.78 (m, 3H), 1.65 – 1.40 (m, 7H), 1.39 – 1.30 (m, 3H), 1.29 – 1.21 (m, 1H), 1.20 – 1.04 (m, 7H), 1.03 – 0.93 (m, 6H), 0.93 – 0.80 (m, 9H), 0.67 (s, 3H).; **<sup>13</sup>C{<sup>1</sup>H} NMR (151 MHz, Chloroform-*d*)** δ 158.52, 139.70, 122.89, 75.43, 56.81, 56.25, 50.13, 42.44, 39.85, 39.65, 38.61, 37.07, 36.68, 36.31, 35.93, 32.03, 31.98, 28.37, 28.23, 28.15, 24.42, 23.96, 22.97, 22.70, 21.17, 19.45, 18.85, 11.99.

### III. General Catalytic Procedures

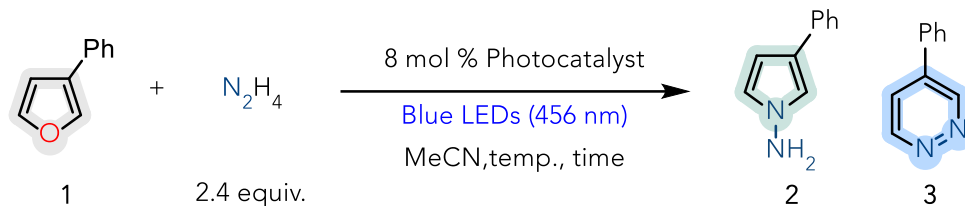

**General procedure for reaction optimization studies.** In a typical experiment, an oven-dried 4 mL vial was charged with 3-phenylfuran **1** (0.1 mmol, 1.0 equiv.),  $N_2H_4$  (0.24 mmol, 2.4 equiv.), 8 mol % of photocatalyst (0.008 mmol, 0.08 equiv.), followed by the additive in an  $N_2$ -filled glovebox. After the addition of the proper reagent, solvent was added to the vial. A magnetic stir bar was charged, sealed with a screw cap and electrical tape, then removed from the glovebox. For the light reaction, the reaction vessel was stirred under irradiation with Kessil™ PR160L-456 nm blue lamps (40 W, 100% intensity) using a household fan. After completion, about 10 mg of 1,3,5-trimethoxybenzene was added to the reaction mixture under an ambient atmosphere. Then, an aliquot of 0.05 mL of the resulting crude mixture was taken and directly transferred to an NMR tube. An additional 0.6 mL of  $CDCl_3$  was added to the NMR cell, and the crude yield was analyzed by either 400 MHz or 500 MHz  $^1H$  NMR spectroscopy using 1,3,5-trimethoxybenzene as an internal standard. The relaxation delay (d1), scan numbers (ns), and dummy scans (ds) were set to 20 seconds, 3 scans, and 1 scan, respectively, to accurately quantify the yield using  $^1H$  NMR spectra.

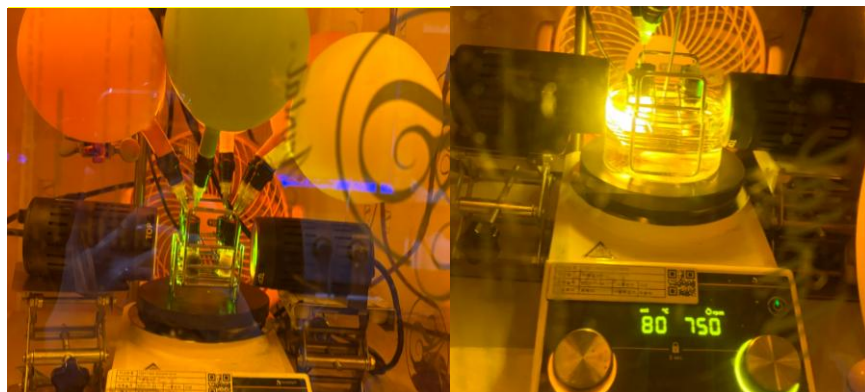

**Figure S2.** Typical reaction setup for irradiation experiments: 23 °C (left), 80 °C (right).

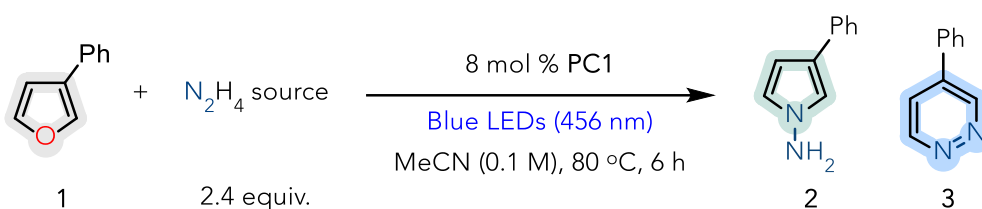

**Table S1.** Reaction optimization studies for *N*-aminopyrrole conversion: effect of  $\text{N}_2\text{H}_4$  source

| Entry | $\text{N}_2\text{H}_4$ source               | $^1\text{H}$ NMR Yield of <b>2</b> (%) | $^1\text{H}$ NMR Yield of <b>3</b> (%) | Unreacted furan <b>1</b> (%) |
|-------|---------------------------------------------|----------------------------------------|----------------------------------------|------------------------------|
| 1     | 1.0 M in MeCN                               | 51                                     | 13                                     | 25                           |
| 2     | 1.0 M in Tetrahydrofuran                    | 26                                     | 10                                     | 42                           |
| 3     | $\text{N}_2\text{H}_4$ $\text{H}_2\text{O}$ | 23                                     | 5                                      | 48                           |

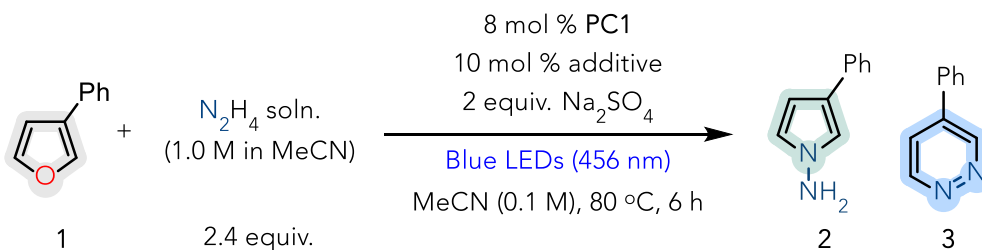

**Table S2.** Reaction optimization studies for *N*-aminopyrrole conversion: effect of additive

| Entry | Additive                   | $^1\text{H}$ NMR Yield of <b>2</b> (%) | $^1\text{H}$ NMR Yield of <b>3</b> (%) | Unreacted furan <b>1</b> (%) |
|-------|----------------------------|----------------------------------------|----------------------------------------|------------------------------|
| 1     | $\text{Sc}(\text{OTf})_3$  | 69                                     | 12                                     | 11                           |
| 2     | $\text{Zn}(\text{OTf})_2$  | 14                                     | 11                                     | 32                           |
| 3     | $\text{Cu}(\text{acac})_2$ | 47                                     | 9                                      | 23                           |
| 4     | Acetic acid                | 49                                     | 10                                     | 20                           |

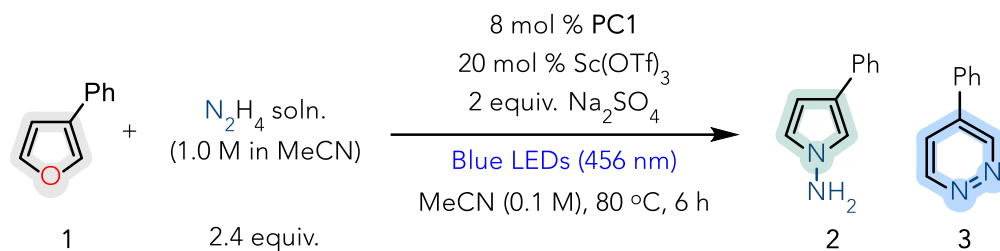

**Table S3.** Reaction optimization studies for *N*-aminopyrrole conversion: other variation

| Entry | Deviation from optimal conditions       | $^1\text{H NMR}$ Yield of <b>2</b> (%) | $^1\text{H NMR}$ Yield of <b>3</b> (%) | Unreacted furan <b>1</b> (%) |
|-------|-----------------------------------------|----------------------------------------|----------------------------------------|------------------------------|
| 1     | none                                    | 86                                     | 13                                     | 0                            |
| 2     | Without $\text{Sc(OTf)}_3$              | 61                                     | 11                                     | 26                           |
| 3     | Without $\text{Na}_2\text{SO}_4$        | 68                                     | 16                                     | 0                            |
| 4     | $\text{N}_2\text{H}_4 \cdot \text{HCl}$ | 0                                      | 0                                      | 43                           |
| 5     | <b>PC2</b> instead of <b>PC1</b>        | 67                                     | 13                                     | 0                            |
| 6     | <b>PC3</b> instead of <b>PC1</b>        | 29                                     | 9                                      | 52                           |
| 7     | <b>PC4</b> instead of <b>PC1</b>        | 63                                     | 14                                     | 16                           |

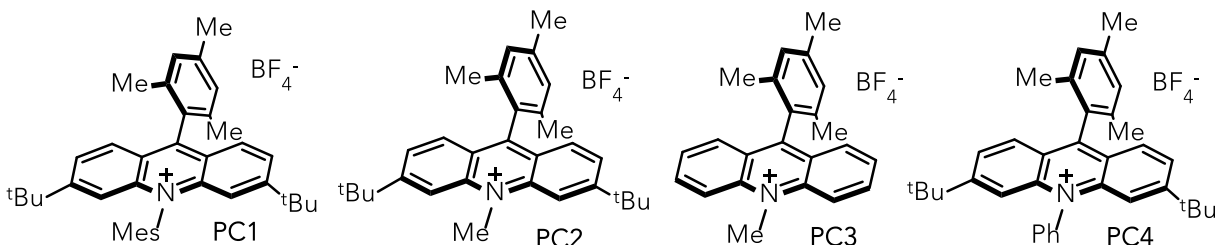

**Table S4.** Control studies for the *N*-aminopyrrole reaction system.

| Entry | Deviation from optimal conditions | $^1\text{H NMR}$ Yield of <b>2</b> (%) | $^1\text{H NMR}$ Yield of <b>3</b> (%) | Unreacted furan <b>1</b> (%) |
|-------|-----------------------------------|----------------------------------------|----------------------------------------|------------------------------|
| 1     | none                              | 86                                     | 13                                     | 0                            |
| 2     | w/o Blue LED irradiation          | 0                                      | 0                                      | 99                           |
| 3     | w/o <b>PC1</b>                    | 0                                      | 0                                      | 96                           |
| 4     | w/o irradiation, <b>PC1</b>       | 0                                      | 0                                      | 99                           |

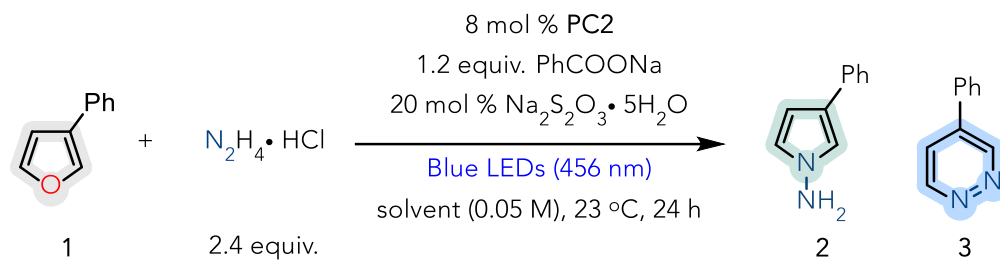

**Table S5.** Reaction optimization studies for pyridazine conversion: effect of solvent

| Entry | Solvent                     | <sup>1</sup> H NMR Yield of <b>2</b> (%) | <sup>1</sup> H NMR Yield of <b>3</b> (%) | Unreacted furan <b>1</b> (%) |
|-------|-----------------------------|------------------------------------------|------------------------------------------|------------------------------|
| 1     | MeCN:H <sub>2</sub> O (4:1) | 0                                        | 90                                       | 0                            |
| 2     | MeCN                        | 18                                       | 25                                       | 28                           |

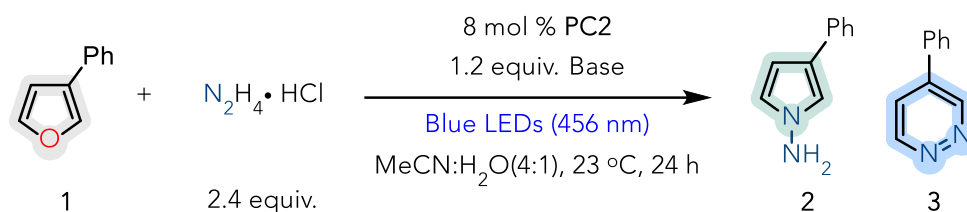

**Table S6.** Reaction optimization studies for pyridazine conversion: effect of base

| Entry | Base                                                                                                       | <sup>1</sup> H NMR Yield of <b>2</b> (%) | <sup>1</sup> H NMR Yield of <b>3</b> (%) | Unreacted furan <b>1</b> (%) |
|-------|------------------------------------------------------------------------------------------------------------|------------------------------------------|------------------------------------------|------------------------------|
| 1     | 1.2 equiv. Sodium benzoate<br>20 mol % Na <sub>2</sub> S <sub>2</sub> O <sub>3</sub> · 5H <sub>2</sub> O   | 0                                        | 90                                       | 0                            |
| 2     | 1.2 equiv. Sodium benzoate<br>1.2 equiv. Na <sub>2</sub> S <sub>2</sub> O <sub>3</sub> · 5H <sub>2</sub> O | 0                                        | 79                                       | 0                            |
| 3     | Sodium benzoate                                                                                            | 0                                        | 71                                       | 0                            |
| 4     | Na <sub>2</sub> S <sub>2</sub> O <sub>3</sub> · 5H <sub>2</sub> O                                          | 0                                        | 57                                       | 0                            |
| 5     | Disodium succinate                                                                                         | 0                                        | 43                                       | 0                            |

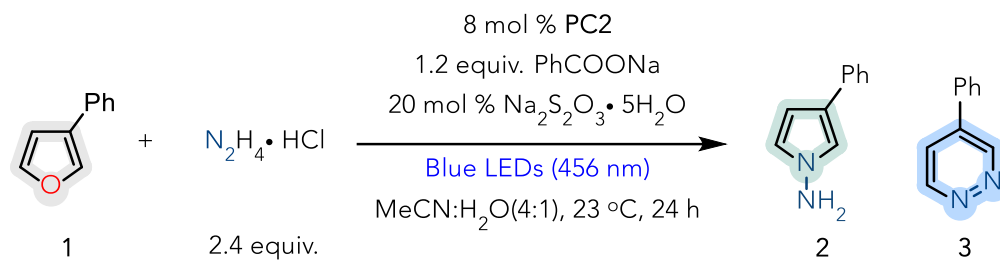

**Table S7.** Reaction optimization studies for pyridazine conversion: other variation

| Entry | Deviation from optimal conditions | <sup>1</sup> H NMR Yield of <b>2</b> (%) | <sup>1</sup> H NMR Yield of <b>3</b> (%) | Unreacted furan <b>1</b> (%) |
|-------|-----------------------------------|------------------------------------------|------------------------------------------|------------------------------|
| 1     | none                              | 0                                        | 90                                       | 0                            |
| 2     | Without PhCOONa                   | 0                                        | 39                                       | 0                            |
| 3     | <b>PC1</b> instead of <b>PC2</b>  | 0                                        | 67                                       | 0                            |
| 4     | <b>PC3</b> instead of <b>PC2</b>  | 0                                        | 10                                       | 0                            |
| 5     | <b>PC4</b> instead of <b>PC2</b>  | 0                                        | 65                                       | 0                            |
| 6     | 4-CN pyridine instead of PhCOONa  | 0                                        | 46                                       | 0                            |

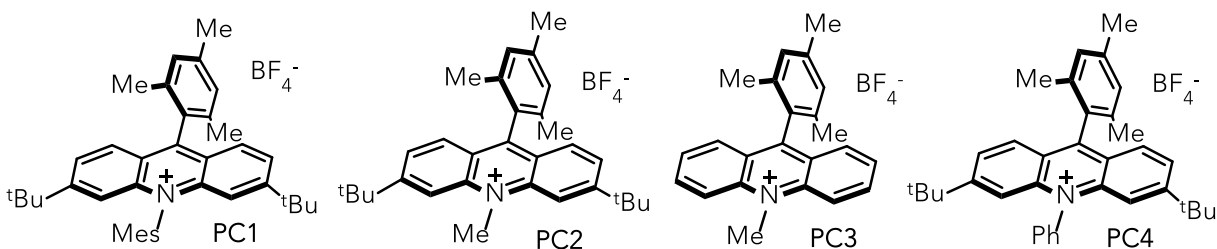

**Table S8.** Control studies for the pyridazine reaction system.

| Entry | Deviation from optimal conditions | <sup>1</sup> H NMR Yield of <b>2</b> (%) | <sup>1</sup> H NMR Yield of <b>3</b> (%) | Unreacted furan <b>1</b> (%) |
|-------|-----------------------------------|------------------------------------------|------------------------------------------|------------------------------|
| 1     | none                              | 0                                        | 90                                       | 0                            |
| 2     | w/o Blue LED irradiation          | 0                                        | 0                                        | 98                           |
| 3     | w/o <b>PC2</b>                    | 0                                        | 0                                        | 96                           |
| 4     | w/o irradiation, <b>PC2</b>       | 0                                        | 0                                        | 99                           |

## General photocatalytic procedure for skeletal diversification

### 1) Furan-to-*N*-aminopyrrole conversion

In a typical experiment, an oven-dried 4 mL vial was charged with furan (0.2 mmol, 1.0 equiv.), scandium (III) triflate (0.04 mmol, 0.2 equiv.), and sodium sulfate (0.4 mmol, 2.0 equiv.), followed by 8 mol % of **PC1** (0.016 mmol, 0.08 equiv.) in an N<sub>2</sub>-filled glovebox. After the addition of the proper reagent, acetonitrile (1.52 mL) was added to the vial. A magnetic stir bar was charged, sealed with a screw cap and electrical tape, then removed from the glovebox. Under an N<sub>2</sub> atmosphere, hydrazine solution (1.0 M in MeCN) (0.48 mL, 2.4 equiv.) was added to the vial, and the mixture was stirred for 6 h under irradiation at 80 °C with Kessil™ PR160L 456 nm blue lamps (40 W, 100% intensity) using a household fan. After completion, the crude mixture was concentrated under reduced pressure, then purified with silica gel flash column chromatography to afford the desired product.

### 2) Furan-to-Pyridazine conversion

In a typical experiment, an oven-dried 4 mL vial was charged with furan (0.2 mmol, 1.0 equiv.), hydrazine monohydrochloride (0.48 mmol, 2.4 equiv.), sodium benzoate (0.24 mmol, 1.2 equiv.), and sodium thiosulfate pentahydrate (0.04 mmol, 0.2 equiv.), followed by 8 mol % of **PC2** (0.016 mmol, 0.08 equiv.) in an N<sub>2</sub>-filled glovebox. After the addition of the proper reagent, acetonitrile (1.6 mL) was added to the vial. A magnetic stir bar was charged, sealed with a screw cap and electrical tape, then removed from the glovebox. Under an N<sub>2</sub> atmosphere, degassed water (0.4 mL) was added to the vial, and the mixture was stirred for 24 h under irradiation at 23 °C with Kessil™ PR160L 456 nm blue lamps (40 W, 100% intensity) using a household fan. After completion, quenched with saturated NaHCO<sub>3</sub>, extracted with ethyl acetate three times, and dried over Na<sub>2</sub>SO<sub>4</sub>. The resultant was filtered and concentrated under reduced pressure, then purified with silica gel flash column chromatography to afford the desired product.

*Note: Substrate **41**, **42** purified by basic alumina column chromatography.*

### 3-phenyl-1H-pyrrol-1-amine (2)

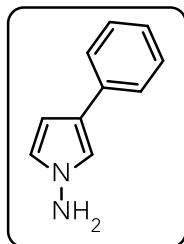

Yellow solid (24.0 mg, 76%); Purified by silica chromatography with EtOAc/*n*-hexane (1:5) eluent; **<sup>1</sup>H NMR (600 MHz, Chloroform-*d*)** δ 7.51 (dd, *J* = 8.2, 1.5 Hz, 2H), 7.36 (appt, *J* = 7.7 Hz, 2H), 7.20 (tq, *J* = 7.6, 1.1 Hz, 1H), 6.99 (appt, *J* = 2.2 Hz, 1H), 6.73 (appt, *J* = 2.6 Hz, 1H), 6.38 (appt, *J* = 2.4 Hz, 1H), 4.86 (s, 2H); **<sup>13</sup>C{<sup>1</sup>H} NMR (151 MHz, Chloroform-*d*)** δ 135.70, 128.74, 125.57, 125.00, 123.16, 122.97, 119.01, 104.36; **HRMS** (ESI) *m/z* calcd. for C<sub>10</sub>H<sub>10</sub>N<sub>2</sub> [M+H]<sup>+</sup>: 159.0917, found: 159.0914; Solid-state structure and its absolute configuration was characterized by X-ray diffraction analysis (CCDC 2554884).

### 3-(*p*-tolyl)-1H-pyrrol-1-amine (5)

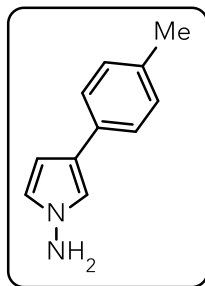

Yellow solid (26.1 mg, 76%); Purified by silica chromatography with EtOAc/*n*-hexane (1:4) eluent; **<sup>1</sup>H NMR (500 MHz, Chloroform-*d*)** δ 7.41 (d, *J* = 7.8 Hz, 2H), 7.18 (d, *J* = 7.8 Hz, 2H), 6.95 (appt, *J* = 2.2 Hz, 1H), 6.71 (appt, *J* = 2.6 Hz, 1H), 6.35 (appt, *J* = 2.5 Hz, 1H), 4.84 (s, 2H), 2.38 (s, 3H); **<sup>13</sup>C{<sup>1</sup>H} NMR (126 MHz, Chloroform-*d*)** δ 135.10, 132.86, 129.42, 124.94, 123.02, 122.99, 118.69, 104.23, 21.16; **HRMS** (ESI) *m/z* calcd. for C<sub>11</sub>H<sub>12</sub>N<sub>2</sub> [M+H]<sup>+</sup>: 173.1073, found: 173.1069.

### 3-(4-methoxyphenyl)-1H-pyrrol-1-amine (6)

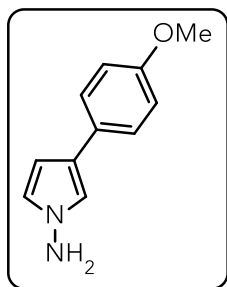

Yellow solid (19.5 mg, 52%); Purified by silica chromatography with EtOAc/*n*-hexane (1:4) eluent; **<sup>1</sup>H NMR (500 MHz, Chloroform-*d*)** δ 7.46 – 7.35 (m, 2H), 6.94 – 6.84 (m, 3H), 6.70 (appt, *J* = 2.6 Hz, 1H), 6.29 (dt, *J* = 4.4, 2.2 Hz, 1H), 4.86 (s, 2H), 3.82 (d, *J* = 2.5 Hz, 3H); **<sup>13</sup>C{<sup>1</sup>H} NMR (126 MHz, Chloroform-*d*)** δ 157.83, 128.60, 126.15, 123.00, 122.81, 118.31, 114.20, 104.13, 55.41; **HRMS** (ESI) *m/z* calcd. for C<sub>11</sub>H<sub>12</sub>N<sub>2</sub>O [M+H]<sup>+</sup>: 189.1022, found: 189.1018.

### 3-(4-(methylthio)phenyl)-1H-pyrrol-1-amine (7)

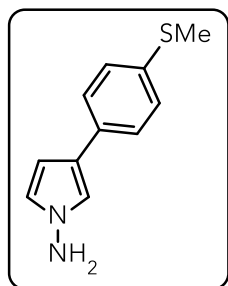

Yellow solid (13.4 mg, 33%); Purified by silica chromatography with EtOAc/*n*-hexane (1:4) eluent;  $^1\text{H NMR}$  (500 MHz, Chloroform-*d*)  $\delta$  7.41 (d,  $J = 7.8$  Hz, 2H), 7.30 – 7.18 (m, 2H), 6.98 (s, 1H), 6.72 (s, 1H), 6.32 (s, 1H), 4.90 (s, 2H), 2.49 (s, 3H);  $^{13}\text{C}\{^1\text{H}\}$  NMR (126 MHz, Chloroform-*d*)  $\delta$  134.85, 133.09, 127.73, 125.51, 123.24, 122.53, 118.94, 104.34, 16.64; HRMS (ESI)  $m/z$

calcd. for  $\text{C}_{11}\text{H}_{12}\text{N}_2\text{S}$   $[\text{M}+\text{H}]^+$ : 205.0794, found: 205.0790.

### 3-(4-fluorophenyl)-1H-pyrrol-1-amine (8)

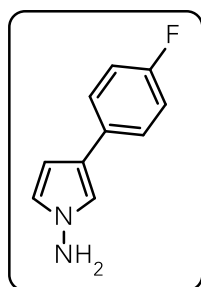

Pale white solid (23.3 mg, 66%); Purified by silica chromatography with EtOAc/*n*-hexane (1:4) eluent;  $^1\text{H NMR}$  (400 MHz, Chloroform-*d*)  $\delta$  7.52 – 7.36 (m, 2H), 7.03 (appt,  $J = 8.7$  Hz, 2H), 6.93 (appt,  $J = 2.2$  Hz, 1H), 6.72 (appt,  $J = 2.6$  Hz, 1H), 6.30 (appt,  $J = 2.4$  Hz, 1H), 4.88 (s, 2H);  $^{13}\text{C}\{^1\text{H}\}$  NMR (101 MHz, Chloroform-*d*)  $\delta$  161.26 (d,  $J = 243.5$  Hz), 131.89 (d,  $J = 3.2$  Hz), 126.39 (d,  $J$

= 7.7 Hz), 123.24, 122.14, 118.80, 115.49 (d,  $J = 21.4$  Hz), 104.34;  $^{19}\text{F NMR}$  (377 MHz, Chloroform-*d*)  $\delta$  -117.91; HRMS (ESI)  $m/z$  calcd. for  $\text{C}_{10}\text{H}_9\text{FN}_2$   $[\text{M}+\text{H}]^+$ : 177.0823, found: 177.0818.

### 3-(4-(trifluoromethyl)phenyl)-1H-pyrrol-1-amine (9)

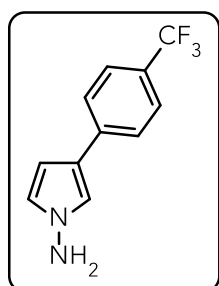

Yellow solid (24.9 mg, 55%); Purified by silica chromatography with EtOAc/*n*-hexane (1:4) eluent;  $^1\text{H NMR}$  (600 MHz, DMSO-*d*<sub>6</sub>)  $\delta$  7.69 (d,  $J = 8.1$  Hz, 2H), 7.59 (d,  $J = 8.1$  Hz, 2H), 7.40 – 7.12 (m, 1H), 6.75 – 6.71 (m, 1H), 6.39 (appt,  $J = 2.4$  Hz, 1H), 6.08 (s, 2H);  $^{13}\text{C}\{^1\text{H}\}$  NMR (151 MHz, DMSO-*d*<sub>6</sub>)  $\delta$  140.08, 125.46 (q,  $J = 4.2$  Hz), 124.80 (q,  $J = 31.2$  Hz), 124.68 (q,  $J = 271.8$  Hz),

124.26, 123.44, 120.19, 119.25, 103.40;  $^{19}\text{F NMR}$  (377 MHz, DMSO-*d*<sub>6</sub>)  $\delta$  -60.51; HRMS (ESI)  $m/z$  calcd. for  $\text{C}_{11}\text{H}_9\text{F}_3\text{N}_2$   $[\text{M}+\text{H}]^+$ : 227.0791, found: 227.0787.

### 3-(1-amino-1H-pyrrol-3-yl)benzonitrile (10)

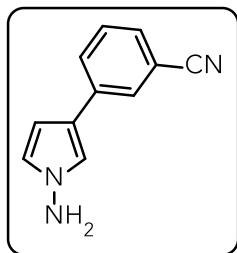

Yellow solid (14.6 mg, 40%); Purified by silica chromatography with EtOAc/*n*-hexane (1:1.5) eluent; **<sup>1</sup>H NMR (600 MHz, Chloroform-*d*)** δ 7.71 (d, *J* = 1.8 Hz, 1H), 7.66 (dt, *J* = 7.1, 1.9 Hz, 1H), 7.45 – 7.37 (m, 2H), 7.04 (appt, *J* = 2.2 Hz, 1H), 6.75 (appt, *J* = 2.6 Hz, 1H), 6.33 (dd, *J* = 2.9, 2.1 Hz, 1H), 4.95 (s, 2H); **<sup>13</sup>C{<sup>1</sup>H} NMR (151 MHz, Chloroform-*d*)** δ 137.05, 129.50, 129.12, 128.83, 128.34, 123.83, 120.85, 119.73, 119.39, 112.75, 104.49; **HRMS (ESI) m/z calcd. for C<sub>11</sub>H<sub>9</sub>N<sub>3</sub> [M+H]<sup>+</sup>: 184.0869, found: 184.0863.**

### 3-(naphthalen-2-yl)-1H-pyrrol-1-amine (11)

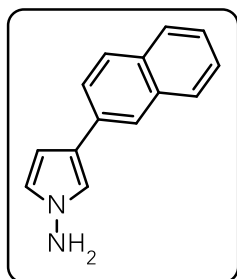

Yellow solid (14.6 mg, 67%); Purified by silica chromatography with EtOAc/*n*-hexane (1:5) eluent; **<sup>1</sup>H NMR (600 MHz, Chloroform-*d*)** δ 7.92 (d, *J* = 1.8 Hz, 1H), 7.88 – 7.75 (m, 3H), 7.65 (dd, *J* = 8.6, 1.8 Hz, 1H), 7.46 (ddd, *J* = 8.1, 6.8, 1.4 Hz, 1H), 7.41 (ddd, *J* = 8.1, 6.8, 1.3 Hz, 1H), 7.11 (appt, *J* = 2.1 Hz, 1H), 6.77 (appt, *J* = 2.5 Hz, 1H), 6.50 (dd, *J* = 2.9, 2.0 Hz, 1H), 4.89 (s, 2H); **<sup>13</sup>C{<sup>1</sup>H} NMR (151 MHz, Chloroform-*d*)** δ 134.09, 133.14, 132.01, 128.26, 127.76, 127.74, 126.17, 124.99, 124.49, 123.42, 122.96, 122.39, 119.51, 104.59; **HRMS (ESI) m/z calcd. for C<sub>14</sub>H<sub>12</sub>N<sub>2</sub> [M+H]<sup>+</sup>: 209.1073, found: 209.1070.**

### 3-benzyl-1H-pyrrol-1-amine (12)

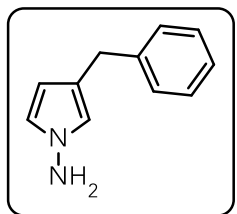

Orange oil (14.8 mg, 43%); Purified by silica chromatography with EtOAc/*n*-hexane (1:4) eluent; **<sup>1</sup>H NMR (600 MHz, Chloroform-*d*)** δ 7.30 (appt, *J* = 7.5 Hz, 2H), 7.25 (d, *J* = 7.3 Hz, 2H), 7.20 (appt, *J* = 7.4 Hz, 1H), 6.62 (appt, *J* = 2.5 Hz, 1H), 6.44 (s, 1H), 5.89 (s, 1H), 4.76 (s, 2H), 3.79 (s, 2H); **<sup>13</sup>C{<sup>1</sup>H} NMR (151 MHz, Chloroform-*d*)** δ 137.05, 129.50, 129.12, 128.83, 128.34, 123.83, 120.85, 119.73, 119.39, 112.75, 104.49; **HRMS (ESI) m/z calcd. for C<sub>12</sub>H<sub>12</sub>N<sub>2</sub> [M+H]<sup>+</sup>: 184.0869, found: 184.0863.**

**NMR (151 MHz, Chloroform-*d*)**  $\delta$  142.27, 128.68, 128.41, 125.83, 122.22, 121.61, 120.24, 106.71, 33.66; **HRMS** (ESI) *m/z* calcd. for C<sub>11</sub>H<sub>12</sub>N<sub>2</sub> [M+H]<sup>+</sup>: 173.1073, found: 173.1068.

### 2-methyl-4-phenyl-1*H*-pyrrol-1-amine (13)

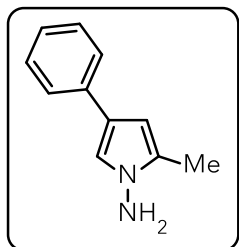

Yellow solid (21.7 mg, 63%); Purified by silica chromatography with EtOAc/*n*-hexane (1:4) eluent; **<sup>1</sup>H NMR (600 MHz, Chloroform-*d*)**  $\delta$  7.49 – 7.44 (m, 2H), 7.32 (appt, *J* = 7.8 Hz, 2H), 7.18 – 7.12 (m, 1H), 6.97 (d, *J* = 2.2 Hz, 1H), 6.13 (dd, *J* = 2.2, 1.1 Hz, 1H), 4.56 (s, 2H), 2.27 (s, 3H); **<sup>13</sup>C{<sup>1</sup>H} NMR**

**(151 MHz, Chloroform-*d*)**  $\delta$  135.91, 130.33, 128.69, 125.37, 124.91, 121.27, 118.01, 102.54, 11.28; **HRMS** (ESI) *m/z* calcd. for C<sub>11</sub>H<sub>12</sub>N<sub>2</sub> [M+H]<sup>+</sup>: 173.1073, found: 173.1067.

### ethyl 3-(1-amino-1*H*-pyrrol-2-yl)propanoate (14)

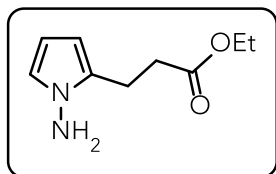

Orange liquid (7.5 mg, 21%); Purified by silica chromatography with EtOAc/*n*-hexane (1:19) eluent; **<sup>1</sup>H NMR (600 MHz, Chloroform-*d*)**  $\delta$  6.66 (appt, *J* = 2.5 Hz, 1H), 5.96 (d, *J* = 3.4 Hz, 1H), 5.80 (d, *J* = 3.0 Hz, 1H),

4.72 (s, 2H), 4.13 (q, *J* = 7.2 Hz, 2H), 2.93 (t, *J* = 7.4 Hz, 2H), 2.65 (t, *J* = 7.4 Hz, 2H), 1.24 (t, *J* = 6.0 Hz, 3H); **<sup>13</sup>C{<sup>1</sup>H} NMR (151 MHz, Chloroform-*d*)**  $\delta$  173.42, 131.97, 121.59, 104.99, 103.79, 60.70, 34.35, 20.72, 14.34; **HRMS** (ESI) *m/z* calcd. for C<sub>9</sub>H<sub>14</sub>N<sub>2</sub>O<sub>2</sub> [M+H]<sup>+</sup>: 183.1128, found: 183.1120.

### 2-pentyl-1*H*-pyrrol-1-amine (15)

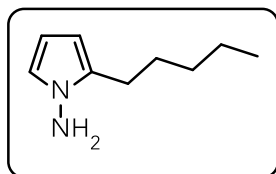

Yellow liquid (7.6 mg, 25%); Purified by silica chromatography with EtOAc/*n*-hexane (1:19) eluent; **<sup>1</sup>H NMR (600 MHz, Chloroform-*d*)**  $\delta$  6.65 (dd, *J* = 2.9, 2.0 Hz, 1H), 5.97 (dd, *J* = 3.8, 2.8 Hz, 1H), 5.83 – 5.68 (m,

1H), 4.51 (s, 2H), 2.73 – 2.46 (m, 2H), 1.78 – 1.57 (m, 2H), 1.48 – 1.31 (m, 4H), 1.00 – 0.85 (m,

3H);  $^{13}\text{C}\{^1\text{H}\}$  NMR (151 MHz, Chloroform-*d*)  $\delta$  133.99, 121.05, 104.78, 103.37, 31.82, 28.89, 25.59, 22.67, 14.19; HRMS (ESI)  $m/z$  calcd. for  $\text{C}_9\text{H}_{16}\text{N}_2$   $[\text{M}+\text{H}]^+$ : 153.1386, found: 153.1381.

### 3-(3,5-di(furan-3-yl)phenyl)-1H-pyrrol-1-amine (16)

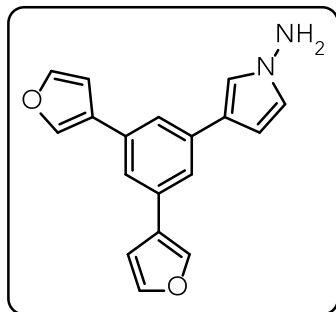

Use 7.2 equiv. of  $\text{N}_2\text{H}_4$  solution (1.0 M in MeCN); Yellow solid (53.4 mg, 92%); Purified by silica chromatography with EtOAc/*n*-hexane (1:2.5) eluent;  $^1\text{H}$  NMR (600 MHz, Chloroform-*d*)  $\delta$  7.79 (appt,  $J$  = 1.2 Hz, 2H), 7.61 – 7.46 (m, 4H), 7.40 (appt,  $J$  = 1.6 Hz, 1H), 7.07 (appt,  $J$  = 2.1 Hz, 1H), 6.76 (dd,  $J$  = 1.8, 0.9 Hz, 3H), 6.41 (dd,  $J$  =

2.9, 2.0 Hz, 1H), 4.93 (s, 2H);  $^{13}\text{C}\{^1\text{H}\}$  NMR (151 MHz, Chloroform-*d*)  $\delta$  143.76, 138.81, 138.80, 136.84, 133.36, 126.65, 123.31, 122.68, 121.64, 121.03, 119.39, 109.19, 104.66; HRMS (ESI)  $m/z$  calcd. for  $\text{C}_{18}\text{H}_{14}\text{N}_2\text{O}_2$   $[\text{M}+\text{H}]^+$ : 291.1128, found: 291.1125.

### N-(2-phenyl-1H-pyrrol-1-yl)benzamide (17)

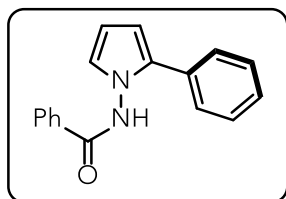

Run with benzoyl hydrazine instead of hydrazine solution; Green solid (47.2 mg, 90%); Purified by silica chromatography with EtOAc/*n*-hexane (1:5) eluent;  $^1\text{H}$  NMR (600 MHz, Chloroform-*d*)  $\delta$  8.69 (s, 1H), 7.56 (d,  $J$  = 7.6 Hz, 2H), 7.40 (appt,  $J$  = 7.5 Hz, 1H), 7.28 (d,  $J$  = 7.6 Hz, 4H), 7.18

(appt,  $J$  = 7.5 Hz, 2H), 7.14 – 7.07 (m, 1H), 6.61 (dt,  $J$  = 3.3, 1.3 Hz, 1H), 6.20 (d,  $J$  = 3.9 Hz, 1H), 6.13 (d,  $J$  = 3.5 Hz, 1H);  $^{13}\text{C}\{^1\text{H}\}$  NMR (151 MHz, Chloroform-*d*)  $\delta$  167.25, 134.21, 132.68, 131.70, 131.54, 128.99, 128.58, 128.04, 127.52, 127.30, 123.71, 107.97, 107.73; HRMS (ESI)  $m/z$  calcd. for  $\text{C}_{17}\text{H}_{14}\text{N}_2\text{O}$   $[\text{M}+\text{H}]^+$ : 263.1179, found: 263.1176.

### ***N*-(3-phenyl-1*H*-pyrrol-1-yl)benzamide (18)**

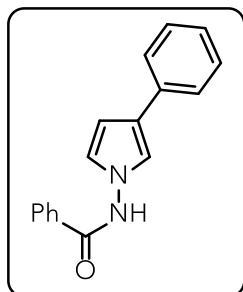

Run with benzoyl hydrazine instead of hydrazine solution; Yellow solid (30.0 mg, 57%); Purified by silica chromatography with EtOAc/*n*-hexane (1:1.5) eluent; **<sup>1</sup>H NMR (400 MHz, DMSO-*d*<sub>6</sub>)** δ 11.83 (s, 1H), 7.96 (d, *J* = 7.2 Hz, 2H), 7.70 – 7.61 (m, 1H), 7.60 – 7.51 (m, 4H), 7.39 – 7.28 (m, 3H), 7.19 – 7.10 (m, 1H), 6.91 (dd, *J* = 3.0, 2.2 Hz, 1H), 6.53 (dd, *J* = 3.0, 1.9 Hz, 1H);

**<sup>13</sup>C{<sup>1</sup>H} NMR (101 MHz, DMSO-*d*<sub>6</sub>)** δ 165.81, 135.16, 132.37, 131.78, 128.67, 128.62, 127.60, 125.32, 124.39, 123.24, 122.14, 119.09, 104.44; **HRMS (ESI)** *m/z* calcd. for C<sub>18</sub>H<sub>14</sub>N<sub>2</sub>O<sub>2</sub> [M+H]<sup>+</sup>: 291.1128, found: 291.1125.

### ***tert*-butyl (3-phenyl-1*H*-pyrrol-1-yl)carbamate (19)**

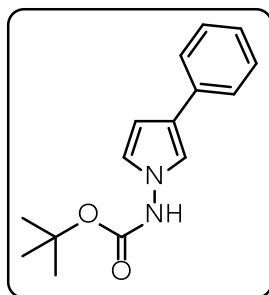

Run with *N*-Boc protected hydrazine instead of hydrazine solution; Yellow solid (25.8 mg, 50%); Purified by silica chromatography with EtOAc/*n*-hexane (1:5) eluent; **<sup>1</sup>H NMR (600 MHz, Chloroform-*d*)** δ 7.49 (dd, *J* = 8.3, 1.3 Hz, 2H), 7.33 (appt, *J* = 7.8 Hz, 2H), 7.30 (s, 1H), 7.21 – 7.14 (m, 1H), 6.97 (appt, *J* = 2.1 Hz, 1H), 6.71 (appt, *J* = 2.6 Hz, 1H), 6.44 (dd, *J* =

3.1, 1.9 Hz, 1H), 1.51 (s, 9H); **<sup>13</sup>C{<sup>1</sup>H} NMR (151 MHz, Chloroform-*d*)** δ 154.56, 135.29, 128.69, 125.88, 125.30, 123.24, 118.94, 105.74, 82.56, 28.29; **HRMS (ESI)** *m/z* calcd. for C<sub>15</sub>H<sub>18</sub>N<sub>2</sub>O<sub>2</sub> [M+H]<sup>+</sup>: 259.1441, found: 259.1438.

### ***N*-(*tert*-butyl)-3-phenyl-1*H*-pyrrol-1-amine (20)**

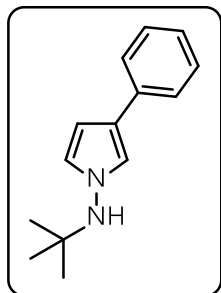

Run with *N*-*tert*butyl-protected hydrazine instead of hydrazine solution; Yellow liquid (13.5 mg, 31%); Purified by silica chromatography with EtOAc/*n*-hexane (1:4) eluent; **<sup>1</sup>H NMR (500 MHz, Chloroform-*d*)** δ 7.51 (dd, *J* = 8.3, 1.4 Hz, 2H), 7.36 – 7.29 (m, 2H), 7.19 – 7.13 (m, 1H), 6.96 (appt, *J* = 2.1 Hz, 1H), 6.67 (appt, *J* = 2.6 Hz, 1H), 6.37 (dd, *J* = 3.0, 1.9 Hz, 1H), 4.45 (s, 1H),

1.20 (s, 9H);  $^{13}\text{C}\{^1\text{H}\}$  NMR (126 MHz, Chloroform-*d*)  $\delta$  135.92, 128.72, 125.42, 124.97, 123.89, 122.05, 119.65, 103.56, 55.67, 28.39; HRMS (ESI) *m/z* calcd. for  $\text{C}_{14}\text{H}_{18}\text{N}_2$   $[\text{M}+\text{H}]^+$ : 215.1543, found: 215.1541.

#### 4-phenylpyridazine (3)

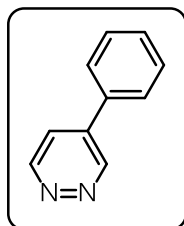

0.1 mmol scale of **1**; Pale white solid (13.2 mg, 85%); Purified by silica chromatography with EtOAc/*n*-hexane (3:2) eluent;  $^1\text{H}$  NMR (600 MHz, Chloroform-*d*)  $\delta$  9.46 (d,  $J$  = 2.4 Hz, 1H), 9.22 (d,  $J$  = 5.3 Hz, 1H), 7.70 – 7.62 (m, 3H), 7.52 (dd,  $J$  = 11.0, 7.1 Hz, 3H);  $^{13}\text{C}\{^1\text{H}\}$  NMR (151 MHz, Chloroform-*d*)  $\delta$  151.55, 150.11, 138.65, 134.62, 130.26, 129.67, 127.20, 123.40; NMR spectroscopic signatures are matched with that of the previously reported ones<sup>17</sup>.

#### 4-(*p*-tolyl)pyridazine (21)

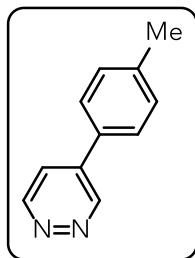

Yellow solid (27.0 mg, 80%); Purified by silica chromatography with EtOAc/*n*-hexane (4:1) eluent;  $^1\text{H}$  NMR (600 MHz, Chloroform-*d*)  $\delta$  9.45 (dd,  $J$  = 2.5, 1.2 Hz, 1H), 9.19 (dd,  $J$  = 5.5, 1.2 Hz, 1H), 7.62 (dd,  $J$  = 5.4, 2.5 Hz, 1H), 7.58 (d,  $J$  = 8.2 Hz, 2H), 7.34 (d,  $J$  = 7.9 Hz, 2H), 2.43 (s, 3H);  $^{13}\text{C}\{^1\text{H}\}$  NMR (151 MHz, Chloroform-*d*)  $\delta$  151.47, 149.96, 140.69, 138.56, 131.65, 130.41, 127.03, 123.02, 21.44; HRMS (ESI) *m/z* calcd. for  $\text{C}_{11}\text{H}_{11}\text{N}_2$   $[\text{M}+\text{H}]^+$ : 171.0917, found: 171.0914.

#### 4-(4-methoxyphenyl)pyridazine (22)

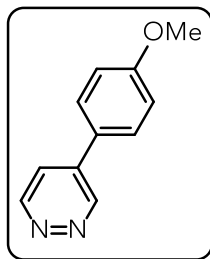

Yellow solid (30.0 mg, 80%); Purified by silica chromatography with EtOAc/*n*-hexane (4:1) eluent;  $^1\text{H}$  NMR (600 MHz, Chloroform-*d*)  $\delta$  9.45 – 9.41 (m, 1H), 9.15 (d,  $J$  = 5.4 Hz, 1H), 7.63 (d,  $J$  = 9.1 Hz, 2H), 7.59 (dd,  $J$  = 5.5, 2.5 Hz, 1H), 7.05 (d,  $J$  = 8.7 Hz, 2H), 3.87 (s, 3H);  $^{13}\text{C}\{^1\text{H}\}$  NMR (151 MHz, Chloroform-*d*)

$\delta$  161.52, 151.42, 149.74, 138.15, 128.48, 126.66, 122.50, 115.18, 55.60; **HRMS** (ESI)  $m/z$  calcd. for  $C_{11}H_{11}N_2O$   $[M+H]^+$ : 187.0866, found: 187.0864.

#### 4-(4-(methylthio)phenyl)pyridazine (23)

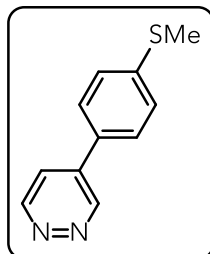

Yellow solid (25.0 mg, 62%); Purified by silica chromatography with EtOAc/*n*-hexane (4:1) eluent;  **$^1H$  NMR (600 MHz, Chloroform-*d*)**  $\delta$  9.44 (s, 1H), 9.19 (d,  $J$  = 5.4 Hz, 1H), 7.60 (dd,  $J$  = 8.5, 2.1 Hz, 3H), 7.38 (d,  $J$  = 8.0 Hz, 2H), 2.54 (s, 3H);  **$^{13}C\{^1H\}$  NMR (151 MHz, Chloroform-*d*)**  $\delta$  151.51, 149.70, 142.31,

137.98, 130.73, 127.38, 126.85, 122.73, 15.33; **HRMS** (ESI)  $m/z$  calcd. for  $C_{11}H_{11}N_2S$   $[M+H]^+$ : 203.0637, found: 203.0636.

#### 4-(4-fluorophenyl)pyridazine (24)

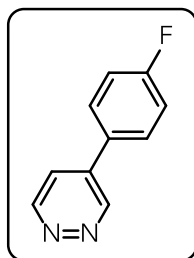

Yellow solid (12.3 mg, 35%); Purified by silica chromatography with EtOAc/*n*-hexane (4:1) eluent;  **$^1H$  NMR (600 MHz, Chloroform-*d*)**  $\delta$  9.42 (dd,  $J$  = 2.6, 1.2 Hz, 1H), 9.21 (dd,  $J$  = 5.4, 1.2 Hz, 1H), 7.69 – 7.63 (m, 2H), 7.61 (dd,  $J$  = 5.4, 2.5 Hz, 1H), 7.23 (appt,  $J$  = 8.5 Hz, 2H);  **$^{13}C\{^1H\}$  NMR (151 MHz, Chloroform-*d*)**  $\delta$  164.18 (d,  $J$  = 251.4 Hz), 151.50, 149.86, 137.66, 130.78 (d,  $J$  = 3.4 Hz), 129.17 (d,  $J$  = 8.7

Hz), 123.17, 116.90 (d,  $J$  = 22.0 Hz);  **$^{19}F$  NMR (377 MHz, Chloroform-*d*)**  $\delta$  -110.28; **HRMS** (ESI)  $m/z$  calcd. for  $C_{10}H_8FN_2$   $[M+H]^+$ : 175.0666, found: 175.0662.

#### 4-(4-(trifluoromethyl)phenyl)pyridazine (25)

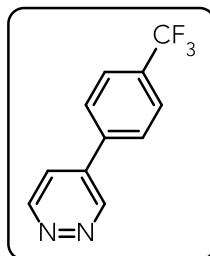

Orange solid (25.1 mg, 56%); Purified by silica chromatography with EtOAc/*n*-hexane (4:1) eluent;  **$^1H$  NMR (600 MHz, Chloroform-*d*)**  $\delta$  9.47 (dd,  $J$  = 2.5, 1.2 Hz, 1H), 9.29 (dd,  $J$  = 5.3, 1.2 Hz, 1H), 7.84 – 7.77 (m, 4H), 7.68 (dd,  $J$  = 5.3, 2.5 Hz, 4H);  **$^{13}C\{^1H\}$  NMR (151 MHz, Chloroform-*d*)**  $\delta$  151.64, 149.85,

138.30, 137.37, 132.25 (q,  $J$  = 32.9 Hz), 127.76, 126.68 (q,  $J$  = 3.7 Hz), 123.83 (q,  $J$  = 272.2 Hz),

123.73;  $^{19}\text{F}$  NMR (471 MHz, Chloroform-*d*)  $\delta$  -62.88; HRMS (ESI) *m/z* calcd. for  $\text{C}_{11}\text{H}_8\text{F}_3\text{N}_2$  [M+H] $^+$ : 225.0634, found: 225.0633.

### 3-(pyridazin-4-yl)benzonitrile (26)

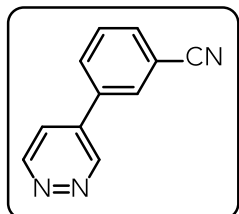

Orange solid (12.6 mg, 35%); Purified by silica chromatography with EtOAc/*n*-hexane (4:1) eluent;  $^1\text{H}$  NMR (400 MHz, Chloroform-*d*)  $\delta$  9.46 (s, 1H), 9.32 (d,  $J$  = 5.3 Hz, 1H), 7.96 (s, 1H), 7.91 (d,  $J$  = 7.9 Hz, 1H), 7.82 (d,  $J$  = 7.8 Hz, 1H), 7.70 (appt,  $J$  = 7.8 Hz, 1H), 7.66 (dd,  $J$  = 5.4, 2.5 Hz, 1H);

$^{13}\text{C}\{^1\text{H}\}$  NMR (151 MHz, Chloroform-*d*)  $\delta$  151.65, 149.58, 136.72, 136.17, 133.58, 131.51, 130.87, 130.72, 123.67, 117.97, 114.28; HRMS (ESI) *m/z* calcd. for  $\text{C}_{11}\text{H}_8\text{N}_3$  [M+H] $^+$ : 182.0713, found: 182.0709.

### 4-(pyridin-2-yl)pyridazine (27)

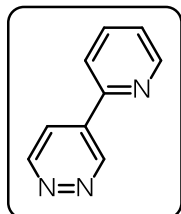

Yellow solid (28.0 mg, 89%); Purified by silica chromatography with EtOAc/*n*-hexane (8:1) eluent;  $^1\text{H}$  NMR (600 MHz, Chloroform-*d*)  $\delta$  9.80 (dt,  $J$  = 2.2, 1.0 Hz, 1H), 9.29 (dt,  $J$  = 5.4, 0.9 Hz, 1H), 8.80 – 8.75 (m, 1H), 8.07 (dd,  $J$  = 5.4, 2.4 Hz, 1H), 7.87 (dt,  $J$  = 5.2, 1.4 Hz, 2H), 7.44 – 7.37 (m, 1H);  $^{13}\text{C}\{^1\text{H}\}$  NMR (151

MHz, Chloroform-*d*)  $\delta$  151.85, 150.75, 149.29, 137.46, 136.59, 124.80, 123.09, 121.25; HRMS (ESI) *m/z* calcd. for  $\text{C}_9\text{H}_8\text{N}_3$  [M+H] $^+$ : 158.0713, found: 158.0710.

### 4-(pyrazin-2-yl)pyridazine (28)

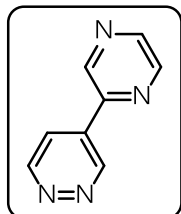

Brown solid (22.5 mg, 71%); Purified by silica chromatography with EtOAc/*n*-hexane (8:1) eluent;  $^1\text{H}$  NMR (600 MHz, Chloroform-*d*)  $\delta$  9.85 (s, 1H), 9.36 (d,  $J$  = 4.2 Hz, 1H), 9.17 (d,  $J$  = 3.2 Hz, 1H), 8.75 (d,  $J$  = 4.1 Hz, 1H), 8.70 (d,  $J$  = 3.5 Hz, 1H), 8.09 (dq,  $J$  = 5.3, 2.5 Hz, 1H);  $^{13}\text{C}\{^1\text{H}\}$  NMR (151 MHz, Chloroform-*d*)

$\delta$  151.90, 148.77, 147.68, 145.80, 145.15, 142.55, 134.01, 123.03; **HRMS** (ESI)  $m/z$  calcd. for  $C_8H_7N_4$   $[M+H]^+$ : 159.0665, found: 159.0661.

### 4-(naphthalen-2-yl)pyridazine (29)

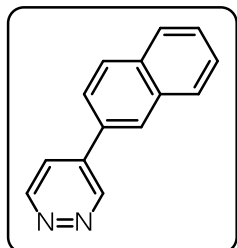

Yellow solid (31.0 mg, 75%); Purified by silica chromatography with EtOAc/*n*-hexane (4:1) eluent;  **$^1H$  NMR (600 MHz, Chloroform-*d*)**  $\delta$  9.60 (dd,  $J$  = 2.6, 1.2 Hz, 1H), 9.26 (dd,  $J$  = 5.4, 1.2 Hz, 1H), 8.17 (d,  $J$  = 1.9 Hz, 1H), 8.01 (d,  $J$  = 8.5 Hz, 1H), 7.98 – 7.93 (m, 1H), 7.93 – 7.87 (m, 1H), 7.76 (ddd,  $J$  = 10.4, 7.0, 2.2 Hz, 2H), 7.61 – 7.55 (m, 2H);  **$^{13}C\{^1H\}$  NMR (151 MHz, Chloroform-*d*)**  $\delta$  151.55, 150.23, 138.64, 133.94, 133.52, 131.84, 129.71, 128.69, 127.96, 127.68, 127.27, 127.20, 123.98, 123.54; **HRMS** (ESI)  $m/z$  calcd. for  $C_{14}H_{11}N_2$   $[M+H]^+$ : 207.0917, found: 207.0916.

### 3-phenylpyridazine (30)

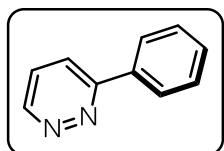

The yield is determined by  $^1H$  NMR because of the instability of the product (35%,  $^1H$  NMR yield);  **$^1H$  NMR (600 MHz, Chloroform-*d*)**  $\delta$  9.21 – 9.17 (m, 1H), 8.12 – 8.06 (m, 2H), 7.92 (dd,  $J$  = 8.5, 1.6 Hz, 1H), 7.60 (dd,  $J$  = 8.6, 4.9 Hz, 1H), 7.57 – 7.50 (m, 3H); NMR spectroscopic signatures are matched with that of the previously reported ones<sup>18</sup>.

### 3-(pyridin-2-yl)pyridazine (31)

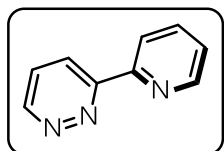

Brown solid (12.6 mg, 40%); Purified by silica chromatography with EtOAc/*n*-hexane (8:1) eluent;  **$^1H$  NMR (600 MHz, Chloroform-*d*)**  $\delta$  9.21 (dd,  $J$  = 5.0, 1.7 Hz, 1H), 8.86 – 8.66 (m, 2H), 8.57 (dd,  $J$  = 8.5, 1.7 Hz, 1H), 7.89 (td,  $J$  = 7.8, 1.8 Hz, 1H), 7.61 (dd,  $J$  = 8.5, 4.9 Hz, 1H), 7.41 (ddd,  $J$  = 7.5, 4.8, 1.2 Hz, 1H);  **$^{13}C\{^1H\}$  NMR (151 MHz, Chloroform-*d*)**  $\delta$  158.80, 153.62, 151.34, 149.54, 137.39, 127.16, 124.95, 124.62, 121.80; NMR spectroscopic signatures are matched with that of the previously reported ones<sup>18</sup>.

### 3-pentylpyridazine (32)

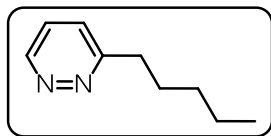

Yellow solid (13.2 mg, 44%); Purified by silica chromatography with EtOAc/*n*-hexane (3:1) eluent;  $^1\text{H NMR}$  (600 MHz, Chloroform-*d*)  $\delta$  9.04 (dd,  $J = 4.8, 1.7$  Hz, 1H), 7.38 (dd,  $J = 8.4, 4.8$  Hz, 1H), 7.32 (dd,  $J = 8.5, 1.7$  Hz, 1H), 3.00 – 2.94 (m, 2H), 1.78 (dq,  $J = 9.4, 7.3$  Hz, 2H), 1.36 (dq,  $J = 6.7, 3.4$  Hz, 4H), 0.94 – 0.87 (m, 3H);  $^{13}\text{C}\{^1\text{H}\}$  NMR (101 MHz, Chloroform-*d*)  $\delta$  164.26, 149.67, 126.45, 126.30, 36.51, 31.56, 29.49, 22.57, 14.10; NMR spectroscopic signatures are matched with that of the previously reported ones<sup>19</sup>.

### ethyl 3-(pyridazin-3-yl)propanoate (33)

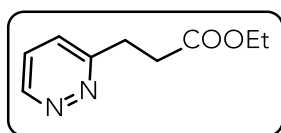

Yellow solid (11.5 mg, 32%); Purified by silica chromatography with EtOAc/*n*-hexane (2.5:1) eluent;  $^1\text{H NMR}$  (600 MHz, Chloroform-*d*)  $\delta$  9.07 (dd,  $J = 4.5, 2.1$  Hz, 1H), 7.41 (appt,  $J = 3.3$  Hz, 2H), 4.12 (q,  $J = 7.2$  Hz, 2H), 3.28 (t,  $J = 7.2$  Hz, 2H), 2.94 (t,  $J = 7.2$  Hz, 2H), 1.23 (t,  $J = 7.2$  Hz, 3H);  $^{13}\text{C}\{^1\text{H}\}$  NMR (101 MHz, Chloroform-*d*)  $\delta$  172.81, 162.26, 149.91, 127.13, 126.57, 60.78, 33.04, 31.26, 14.32; HRMS (ESI)  $m/z$  calcd. for  $\text{C}_9\text{H}_{12}\text{N}_2\text{O}_2$   $[\text{M}+\text{H}]^+$ : 181.0972, found: 181.0966.

### 2-(pyridazin-3-ylmethyl)isoindoline-1,3-dione (34)

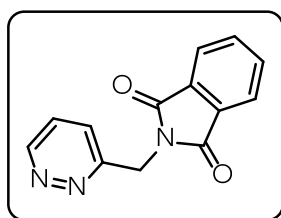

Yellow solid (16.2 mg, 34%); Purified by silica chromatography with EtOAc/*n*-hexane (4:1) eluent;  $^1\text{H NMR}$  (600 MHz, Chloroform-*d*)  $\delta$  9.11 (dd,  $J = 4.9, 1.7$  Hz, 1H), 7.88 (dd,  $J = 5.4, 3.1$  Hz, 2H), 7.75 (dd,  $J = 5.4, 3.0$  Hz, 2H), 7.51 – 7.42 (m, 2H), 5.21 (s, 2H);  $^{13}\text{C}\{^1\text{H}\}$  NMR (151 MHz, Chloroform-*d*)  $\delta$  168.01, 157.81, 150.84, 134.38, 132.19, 126.89, 125.44, 123.76, 41.53; HRMS (ESI)  $m/z$  calcd. for  $\text{C}_{13}\text{H}_9\text{N}_3\text{O}_2$   $[\text{M}+\text{H}]^+$ : 240.0768, found: 240.0765.

### 3,6-diphenylpyridazine (35)

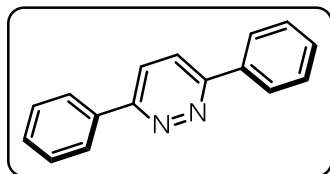

Yellow solid (12.0 mg, 26%); Purified by silica chromatography with EtOAc/*n*-hexane (3:1) eluent;  $^1\text{H NMR}$  (600 MHz, Chloroform-*d*)  $\delta$  8.19 – 8.14 (m, 4H), 7.94 (s, 2H), 7.62 – 7.47 (m, 6H);  $^{13}\text{C}\{^1\text{H}\}$  NMR (151 MHz, Chloroform-*d*)  $\delta$  157.78, 136.27, 130.19, 129.20, 127.09, 124.35; NMR spectroscopic signatures are matched with that of the previously reported ones<sup>20</sup>.

### 4,5-diphenylpyridazine (4)

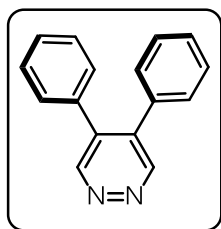

Yellow solid (38.5 mg, 83%); Purified by silica chromatography with EtOAc/*n*-hexane (1:1) eluent;  $^1\text{H NMR}$  (600 MHz, Chloroform-*d*)  $\delta$  9.18 (s, 2H), 7.32 (dt,  $J = 14.3, 7.0$  Hz, 6H), 7.19 (d,  $J = 6.8$  Hz, 4H);  $^{13}\text{C}\{^1\text{H}\}$  NMR (151 MHz, Chloroform-*d*)  $\delta$  152.02, 137.24, 134.70, 129.36, 128.94, 128.87; HRMS (ESI)  $m/z$  calcd. for  $\text{C}_{16}\text{H}_{12}\text{N}_2$   $[\text{M}+\text{H}]^+$ : 233.1073, found: 233.1072; Solid-state structure and its absolute configuration was characterized by X-ray diffraction analysis (CCDC 2554882).

### 4,5-di-*p*-tolylpyridazine (36)

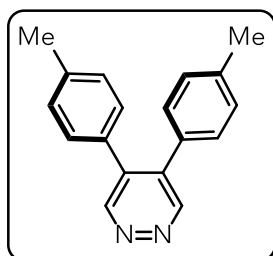

Yellow solid (44.0 mg, 85%); Purified by silica chromatography with EtOAc/*n*-hexane (3:1) eluent;  $^1\text{H NMR}$  (600 MHz, Chloroform-*d*)  $\delta$  9.15 (s, 2H), 7.16 – 7.10 (m, 8H), 2.36 (s, 6H);  $^{13}\text{C}$  NMR (151 MHz, Chloroform-*d*)  $\delta$  152.19, 139.06, 137.27, 132.03, 129.70, 129.33, 21.40; HRMS (ESI)  $m/z$  calcd. for  $\text{C}_{18}\text{H}_{17}\text{N}_2$   $[\text{M}+\text{H}]^+$ : 261.1386, found: 261.1391.

### 3-methyl-5-phenylpyridazine (37)

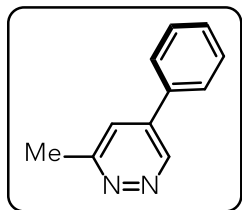

Yellow solid (14.7 mg, 43%); Purified by silica chromatography with EtOAc/*n*-hexane (4:1) eluent; **<sup>1</sup>H NMR (600 MHz, Chloroform-*d*)** δ 9.30 (d, *J* = 2.2 Hz, 1H), 7.66 (dd, *J* = 8.2, 1.5 Hz, 2H), 7.56 – 7.47 (m, 4H), 2.79 (s, 3H); **<sup>13</sup>C{<sup>1</sup>H} NMR (151 MHz, Chloroform-*d*)** δ 160.17, 148.00, 138.67, 134.97, 130.09, 129.62, 127.25, 123.85, 22.56; **HRMS (ESI) *m/z* calcd. for C<sub>11</sub>H<sub>11</sub>N<sub>2</sub> [M+H]<sup>+</sup>: 171.0917, found: 171.0913.**

### Pyridazine (38)

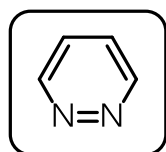

0.2 mmol scale of N<sub>2</sub>H<sub>4</sub> · HCl with 1.0 mmol of furan; The yield is determined by <sup>1</sup>H NMR because of volatility (46%, <sup>1</sup>H NMR yield); **<sup>1</sup>H NMR (600 MHz, Chloroform-*d*)** δ 9.10 (d, *J* = 4.0 Hz, 2H), 7.50 – 7.45 (m, 2H); NMR spectroscopic signatures are matched with that of the previously reported ones<sup>21</sup>.

### 2,5-dimethyl-1*H*-pyrrol-1-amine (39)

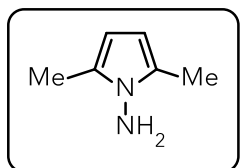

The yield is determined by <sup>1</sup>H NMR because of volatility (Yellow liquid, 64%, <sup>1</sup>H NMR yield); Purified by silica chromatography with EtOAc/*n*-hexane (1:9) eluent; **<sup>1</sup>H NMR (600 MHz, Chloroform-*d*)** δ 5.71 (s, 2H), 4.20 (s, 2H), 2.24 (s, 6H); **<sup>13</sup>C{<sup>1</sup>H} NMR (151 MHz, Chloroform-*d*)** δ 128.12, 102.51, 11.73; NMR spectroscopic signatures are matched with that of the previously reported ones<sup>22</sup>.

### 3,6-dimethylpyridazine (40)

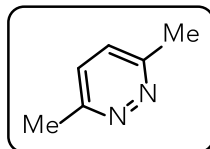

The yield is determined by <sup>1</sup>H NMR because of volatility (48%, <sup>1</sup>H NMR yield); **<sup>1</sup>H NMR (600 MHz, Chloroform-*d*)** δ 7.16 (s, 2H), 2.51 (s, 6H); NMR spectroscopic signatures are matched with that of the previously reported ones<sup>23</sup>.

**(R)-4,7-dimethyl-5,6,7,8-tetrahydrocinnoline (41)**

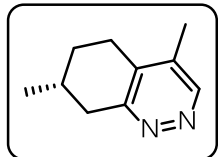

0.1 mmol scale of (+)-menthofuran with 16 mol % of **PC2** in 0.05 M of MeCN:H<sub>2</sub>O (4:1); Yellow liquid (13.2 mg, 81%); Purified by basic alumina chromatography with EtOAc/*n*-hexane (1:4) eluent; **<sup>1</sup>H NMR (500 MHz,**

**Chloroform-*d*)**  $\delta$  8.73 (s, 1H), 3.24 (ddd,  $J = 17.2, 4.6, 2.1$  Hz, 1H), 2.78 (ddd,  $J = 18.1, 5.8, 2.9$  Hz, 1H), 2.68 – 2.54 (m, 2H), 2.19 (s, 3H), 2.05 – 1.87 (m, 2H), 1.42 (dtd,  $J = 13.2, 5.6, 2.2$  Hz, 1H), 1.12 (d,  $J = 6.4$  Hz, 3H); **<sup>13</sup>C{<sup>1</sup>H} NMR (126 MHz, Chloroform-*d*)**  $\delta$  159.27, 150.92, 135.36, 135.26, 38.63, 30.13, 28.65, 24.77, 21.60, 15.69; **HRMS (ESI)**  $m/z$  calcd. for C<sub>10</sub>H<sub>14</sub>N<sub>2</sub> [M+H]<sup>+</sup>: 163.1230, found: 163.1232.

**(2S,3aR,6R,6aR,7S,10S,11aS,11bR)-11b-methyl-2-(pyridazin-4-yl)octahydro-4H-3a,6:7,10-dimethanofuro[2,3-*c*]oxepino[4,5-*e*]oxepine-4,8(6H)-dione (42)**

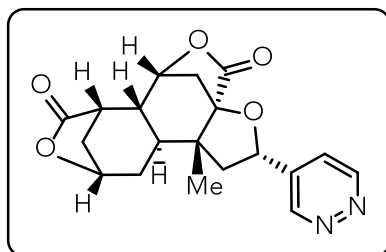

0.05 mmol scale of diosbulbin B with 16 mol % of **PC2**, and 1.0 equiv. of Na<sub>2</sub>S<sub>2</sub>O<sub>3</sub> · 5H<sub>2</sub>O in 0.05 M of MeCN:H<sub>2</sub>O (4:1); Yellow solid (10.0 mg, 56%); Purified by basic alumina chromatography with MeOH/CH<sub>2</sub>Cl<sub>2</sub> (1:9) eluent; **<sup>1</sup>H NMR (600 MHz, DMSO-*d*<sub>6</sub>)**  $\delta$

9.10 (d,  $J = 1.9$  Hz, 1H), 9.06 (d,  $J = 5.3$  Hz, 1H), 7.51 (dd,  $J = 5.3, 2.3$  Hz, 1H), 5.93 (s, 1H), 4.82 (t,  $J = 5.3$  Hz, 1H), 4.65 (d,  $J = 5.6$  Hz, 1H), 2.97 (ddd,  $J = 13.8, 11.8, 5.1$  Hz, 1H), 2.69 – 2.60 (m, 2H), 2.35 (dt,  $J = 11.1, 5.5$  Hz, 1H), 2.26 – 2.20 (m, 1H), 2.11 – 2.03 (m, 2H), 1.86 (d,  $J = 11.4$  Hz, 1H), 1.65 (qt,  $J = 13.7, 6.7$  Hz, 2H), 1.46 (d,  $J = 9.7$  Hz, 1H), 1.07 (s, 3H); **<sup>13</sup>C{<sup>1</sup>H} NMR (151 MHz, DMSO-*d*<sub>6</sub>)**  $\delta$  177.73, 176.28, 152.73, 151.11, 142.71, 125.91, 79.74, 77.08, 76.85, 42.22, 41.72, 40.95, 40.21, 38.31, 38.23, 34.50, 27.71, 27.68, 13.58; **HRMS (ESI)**  $m/z$  calcd. for C<sub>19</sub>H<sub>20</sub>N<sub>2</sub>O<sub>5</sub> [M+H]<sup>+</sup>: 357.1445, found: 357.1450.

**(3S,8S,9S,10R,13R,14S,17R)-17-((R)-heptan-2-yl)-10,13-dimethyl-2,3,4,7,8,9,10,11,12,13,14,15,16,17-tetradecahydro-1H-cyclopenta[a]phenanthren-3-yl (3-phenyl-1H-pyrrol-1-yl) carbamate (43)**

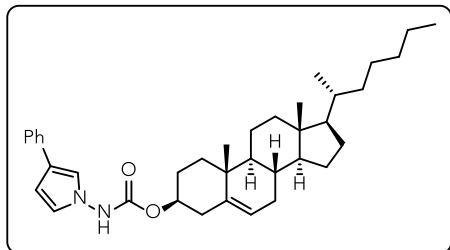

0.05 mmol scale of **1**; Yellow solid (14.8 mg, 52%); Purified by silica chromatography with EtOAc/*n*-hexane (1:19) eluent;

**<sup>1</sup>H NMR (600 MHz, Chloroform-*d*)** δ 7.52 – 7.45 (m, 2H),

7.33 (appt, *J* = 7.8 Hz, 3H), 7.22 – 7.14 (m, 1H), 6.98 (appt,

*J* = 2.1 Hz, 1H), 6.72 (appt, *J* = 2.6 Hz, 1H), 6.45 (dd, *J* = 3.1, 1.9 Hz, 1H), 5.39 (dd, *J* = 5.1, 2.5 Hz, 1H), 4.69 – 4.58 (m, 1H), 2.37 (d, *J* = 42.1 Hz, 2H), 2.06 – 1.77 (m, 5H), 1.68 – 1.42 (m, 7H), 1.39 – 1.21 (m, 5H), 1.19 – 0.99 (m, 12H), 0.92 (d, *J* = 6.5 Hz, 3H), 0.87 (dd, *J* = 6.6, 2.8 Hz, 6H), 0.68 (s, 3H); **<sup>13</sup>C{<sup>1</sup>H} NMR (101 MHz, Chloroform-*d*)** δ 155.05, 139.41, 135.21, 128.74, 125.99, 125.32, 124.11, 123.22, 123.19, 118.88, 105.92, 56.81, 56.27, 50.10, 42.46, 39.85, 39.66, 38.36, 37.01, 36.67, 36.32, 35.94, 32.04, 31.99, 28.37, 28.16, 28.05, 24.43, 23.98, 22.97, 22.71, 21.19, 19.46, 18.86, 12.00; **HRMS (ESI)** *m/z* calcd. for C<sub>37</sub>H<sub>52</sub>N<sub>2</sub>O<sub>2</sub> [M+H]<sup>+</sup>: 571.4258, found: 571.4252.

**(1R,2S,5R)-2-isopropyl-5-methylcyclohexyl (3-phenyl-1H-pyrrol-1-yl)carbamate (44)**

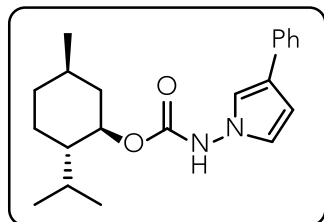

0.1 mmol scale of **1**; Yellow solid (31.3 mg, 92%); Purified by silica chromatography with EtOAc/*n*-hexane (1:9) eluent; **<sup>1</sup>H NMR (600**

**MHz, Chloroform-*d*)** δ 7.48 (td, *J* = 4.6, 2.2 Hz, 2H), 7.41 (d, *J* = 4.0

Hz, 1H), 7.33 (td, *J* = 7.7, 4.2 Hz, 2H), 7.19 (dt, *J* = 11.0, 5.3 Hz, 1H),

6.97 (s, 1H), 6.70 (s, 1H), 6.44 (s, 1H), 4.67 (t, *J* = 11.2 Hz, 1H), 2.10 (d, *J* = 11.6 Hz, 1H), 1.91 (s, 1H), 1.67 (d, *J* = 12.7 Hz, 2H), 1.49 (s, 1H), 1.35 (s, 1H), 1.11 – 0.98 (m, 2H), 0.96 – 0.88 (m, 6H), 0.85 – 0.76 (m, 4H); **<sup>13</sup>C{<sup>1</sup>H} NMR (101 MHz, Chloroform-*d*)** δ 155.45, 135.23, 128.72, 125.95, 125.29, 124.02, 123.23, 118.90, 105.81, 47.23, 41.10, 34.21, 31.49, 26.47, 23.60, 22.11, 20.87, 16.60; **HRMS (ESI)** *m/z* calcd. for C<sub>21</sub>H<sub>28</sub>N<sub>2</sub>O<sub>2</sub> [M+H]<sup>+</sup>: 341.2224, found: 341.2221.

### ***N*-(3-phenyl-1*H*-pyrrol-1-yl)isonicotinamide (45)**

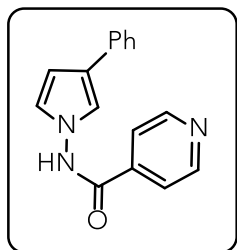

Yellow solid (43.7 mg, 83%); Purified by silica chromatography with EtOAc/*n*-hexane (9:1) eluent; **<sup>1</sup>H NMR (600 MHz, Chloroform-*d*)** δ 10.69 (s, 1H), 8.90 – 8.37 (m, 2H), 7.64 – 7.49 (m, 2H), 7.45 – 7.32 (m, 2H), 7.28 (appt, *J* = 7.7 Hz, 2H), 7.20 – 7.11 (m, 1H), 6.87 (appt, *J* = 2.0 Hz, 1H), 6.60 (appt, *J* = 2.6 Hz, 1H), 6.51 – 6.37 (m, 1H); **<sup>13</sup>C{<sup>1</sup>H} NMR (151 MHz, Chloroform-*d*)** δ 165.40, 150.39, 138.82, 134.64, 129.75, 128.87, 127.17, 126.26, 125.07, 124.37, 122.54, 121.51, 118.04, 106.14; **HRMS** (ESI) *m/z* calcd. for C<sub>16</sub>H<sub>13</sub>N<sub>3</sub>O [M+H]<sup>+</sup>: 263.1131, found: 263.1130; Solid-state structure and its absolute configuration was characterized by X-ray diffraction analysis (CCDC 2554885).

### ***N*-phenethyl-3-phenyl-1*H*-pyrrol-1-amine (46)**

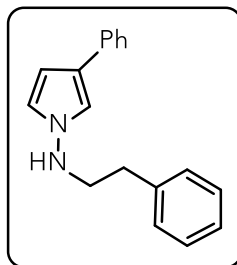

Yellow liquid (12.9 mg, 25%); Purified by silica chromatography with EtOAc/*n*-hexane (1:4) eluent; **<sup>1</sup>H NMR (600 MHz, Chloroform-*d*)** δ 7.54 – 7.48 (m, 2H), 7.38 – 7.31 (m, 5H), 7.28 – 7.23 (m, 2H), 7.20 – 7.15 (m, 1H), 7.10 – 7.03 (m, 1H), 6.79 (q, *J* = 2.6 Hz, 1H), 6.40 (dd, *J* = 3.9, 2.2 Hz, 1H), 4.76 (s, 1H), 3.44 (t, *J* = 7.2 Hz, 2H), 2.84 (t, *J* = 7.1 Hz, 2H); **<sup>13</sup>C{<sup>1</sup>H} NMR (151 MHz, Chloroform-*d*)** δ 138.97, 135.78, 128.84, 128.77, 128.74, 126.64, 125.56, 125.01, 122.88, 121.43, 117.21, 104.36, 54.61, 34.30; **HRMS** (ESI) *m/z* calcd. for C<sub>18</sub>H<sub>18</sub>N<sub>2</sub> [M+H]<sup>+</sup>: 263.1543, found: 263.1544.

## IV. Computational Analysis

### Computational method.

All calculations were carried out using density functional theory (DFT)<sup>24</sup> as implemented in the ORCA 6.0.0 quantum chemistry program package<sup>25,26</sup>. Transition state and ground state geometry optimizations were performed at the M06-2X/def2-SVP level of theory with TightSCF and TightOpt convergence criteria<sup>27,28</sup>. The RIJCOSX approximation was employed in conjunction with the def2/J auxiliary basis set to accelerate the Coulomb and exchange integral evaluations<sup>29</sup>. Solvation effects were incorporated at all stages of the calculation using the Conductor-like Polarizable Continuum Model (CPCM)<sup>30</sup> with acetonitrile as the solvent. All transition-state searches, geometry optimizations, frequency calculations, and single-point energy refinements were performed with CPCM(MeCN). Vibrational frequencies were computed at the same level of theory (M06-2X/def2-SVP/CPCM(MeCN)) to confirm the nature of the stationary points: all intermediates were verified by the absence of imaginary frequencies, while transition states exhibited a single imaginary frequency corresponding to the relevant bond-making or bond-breaking process. The electronic energies of optimized structures were refined by single-point calculations using the triple- $\zeta$  quality def2-TZVP basis set with TightSCF convergence<sup>28</sup>.

$$G(sol) = H(sol) - TS(sol)$$

$$H(sol) = E(SCF, sol) + H_{corr}$$

$$\Delta E(SCF, sol) = \sum E(SCF, sol) \text{ for products} - \sum E(SCF, sol) \text{ for reactants}$$

$$\Delta G(sol) = \sum G(sol) \text{ for products} - \sum G(sol) \text{ for reactants}$$

The energy components were computed using the protocol described above. Here,  $E(\text{SCF, sol})$  denotes the solution-phase electronic energy obtained from CPCM calculations.  $H_{\text{corr}}$  denotes the thermal enthalpy correction obtained from the frequency calculation, including zero-point and thermal contributions. To properly model the reaction in solution, the standard-state conversion to the 1 M solution-phase state was also accounted for by including a concentration term of 0.082 eV in the individual species energies, consistent with the ORCA 6 manual.

**Table S9.** Computed energies of the optimized geometries.

| Structure                                  | <i>E</i> (sol) (SCF/TZ)                | <i>H</i> <sub>corr</sub> (CPCM)             | <i>S</i> (sol)                                | <i>G</i> (sol) |
|--------------------------------------------|----------------------------------------|---------------------------------------------|-----------------------------------------------|----------------|
|                                            | [eV]<br>CPCM(MeCN)<br>M06-2X/def2-TZVP | [kcal/mol]<br>CPCM(MeCN)<br>M06-2X/def2-SVP | [cal/mol •K]<br>CPCM(MeCN)<br>M06-2X/def2-SVP | [eV]           |
| I                                          | -15590.576                             | 138.18                                      | 108.77                                        | -15585.990     |
| I <sub>5</sub> -TS                         | -18634.686                             | 175.240                                     | 121.72                                        | -18628.661     |
| II <sub>5</sub>                            | -18634.745                             | 176.140                                     | 120.71                                        | -18628.668     |
| II <sub>5</sub> -TS                        | -18634.513                             | 172.93                                      | 117.09                                        | -18628.528     |
| III <sub>5</sub>                           | -15591.003                             | 138.71                                      | 102.7                                         | -15586.316     |
| III <sub>5</sub> -TS                       | -18646.992                             | 182.47                                      | 123.09                                        | -18640.671     |
| IV <sub>5</sub>                            | -13511.362                             | 120.49                                      | 96.66                                         | -13507.387     |
| I <sub>6</sub> -TS                         | -18634.744                             | 175.66                                      | 119.34                                        | -18628.670     |
| II <sub>6</sub>                            | -18634.857                             | 176.39                                      | 117.83                                        | -18628.731     |
| II <sub>6</sub> -TS                        | -18634.683                             | 173.57                                      | 114.81                                        | -18628.641     |
| III <sub>6</sub>                           | -15591.06                              | 139.23                                      | 101.42                                        | -15586.334     |
| III <sub>6</sub> -TS                       | -18647.131                             | 183.29                                      | 118.19                                        | -18640.711     |
| IV <sub>6</sub>                            | -13511.035                             | 120.34                                      | 94.35                                         | -13507.036     |
| S1                                         | -12540.134                             | 100.85                                      | 90.520                                        | -12536.931     |
| S2                                         | -15585.529                             | 139.96                                      | 103.170                                       | -15580.794     |
| S3                                         | -15573.482                             | 130.78                                      | 103.000                                       | -15569.143     |
| II <sub>5</sub> '                          | -15589.833                             | -                                           | -                                             | -15589.833     |
| II <sub>6</sub> '                          | -15590.22                              | -                                           | -                                             | -15590.220     |
| II <sub>5</sub> '' (ΔE)                    | -15602.93                              | -                                           | -                                             | -15602.930     |
| II <sub>6</sub> '' (ΔE)                    | -15603.155                             | -                                           | -                                             | -15603.155     |
| II <sub>5</sub> '' (ΔG)                    | -15602.93                              | 148.02                                      | 101.66                                        | -15597.826     |
| II <sub>6</sub> '' (ΔG)                    | -15603.155                             | 148.55                                      | 100.22                                        | -15598.009     |
| SIII <sub>5</sub> -TS                      | -18633.312                             | 173.5                                       | 120.61                                        | -18627.348     |
| N <sub>2</sub> H <sub>4</sub>              | -3044.101                              | 35.78                                       | 56.41                                         | -3043.279      |
| N <sub>2</sub> H <sub>5</sub> <sup>+</sup> | -3056.417                              | 45.18                                       | 57.29                                         | -3055.199      |
| H <sub>2</sub> O                           | -2079.873                              | 15.18                                       | 45.11                                         | -2079.798      |

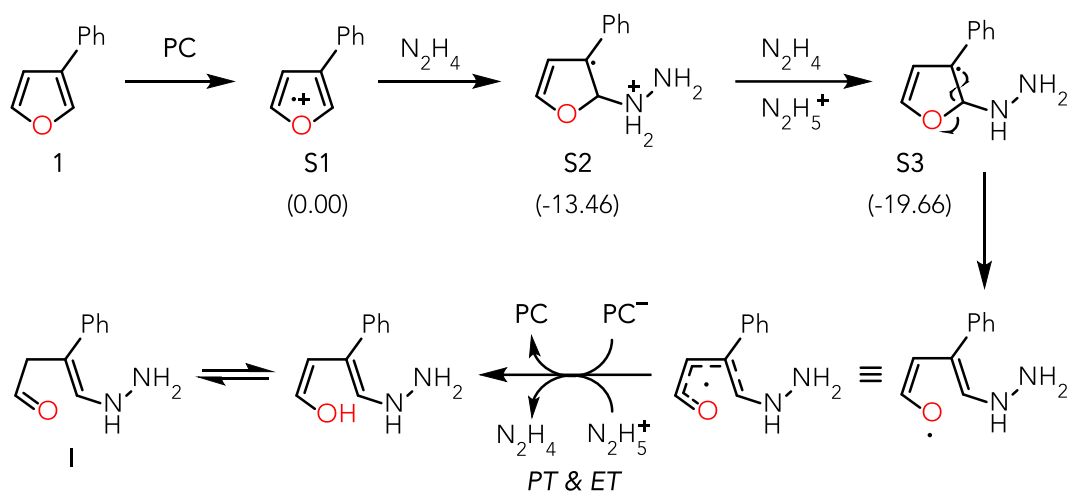

**Figure S3.** Possible pathway for hydrazinium salt formation from hydrazine.

The mechanism in **Figure S3** is proposed based on our previous work<sup>4</sup>. The possible formation of hydrazinium salts was considered as these species can promote the protonation of the hydroxy group, thereby facilitating water elimination in the dehydration step. The overall process is thermodynamically favorable by 19.7 kcal/mol; therefore, hydrazinium salts were incorporated into the main dehydration profile without an additional energetic penalty.

Hydrazinium salts are not required for the initial ring-closure and subsequent proton-transfer steps, as these transformations already proceed readily in their absence, consistent with the low barriers shown in the main profile.

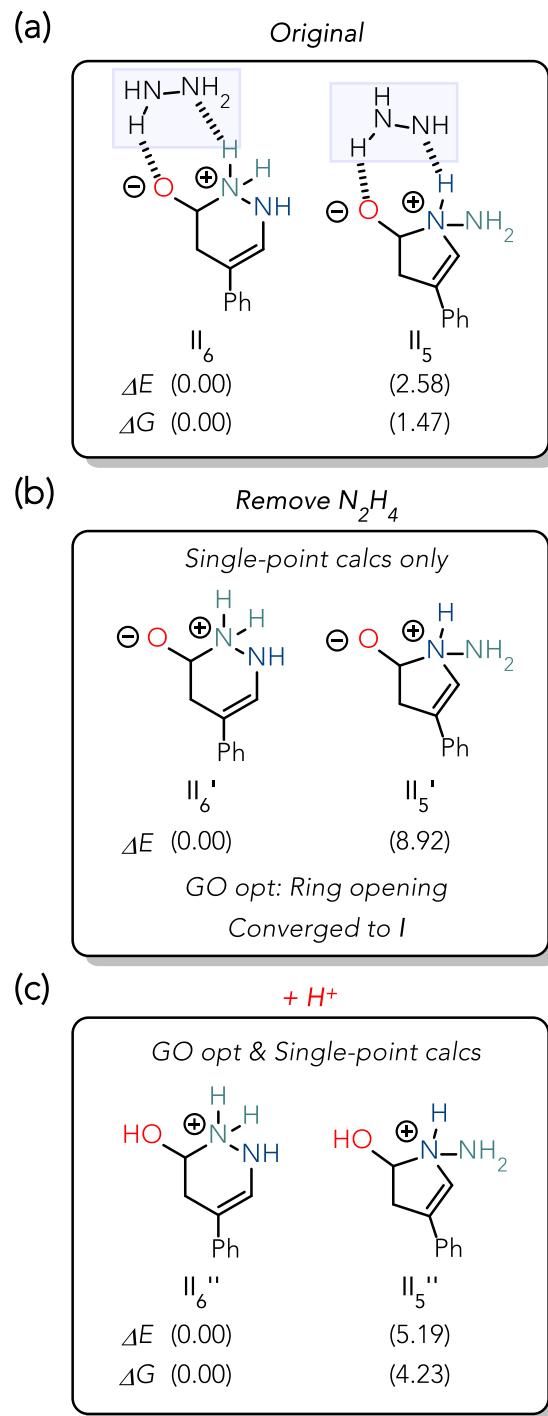

**Figure S4.** Evaluation of cyclized hydrazine-free zwitterionic intermediates (a) with  $\text{N}_2\text{H}_4$ , (b) without  $\text{N}_2\text{H}_4$ , and (c) with  $\text{H}^+$ . GO opt, geometry optimization.

To evaluate the origin of the energy difference between **II**<sub>5</sub> and **II**<sub>6</sub>, we recalculated the single-point energies after removing hydrazine from the original optimized structures (**Figure S4a,b**). The results show that **II**<sub>5</sub>' is 8.9 kcal/mol less stable than the corresponding six-membered-ring intermediate **II**<sub>6</sub>'. Upon geometry optimization, however, **II**<sub>5</sub>' collapsed to intermediate **I**, indicating that the five-membered zwitterionic structure is intrinsically unstable and requires hydrazine assistance for stabilization. Even when this zwitterionic instability was avoided by artificially protonating the oxygen atom prior to geometry optimization, the six-membered structure (**II**<sub>6</sub>'') remained more stable than the five-membered structure (**II**<sub>5</sub>'') by approximately 5.2 kcal/mol (**Figure S4c**).

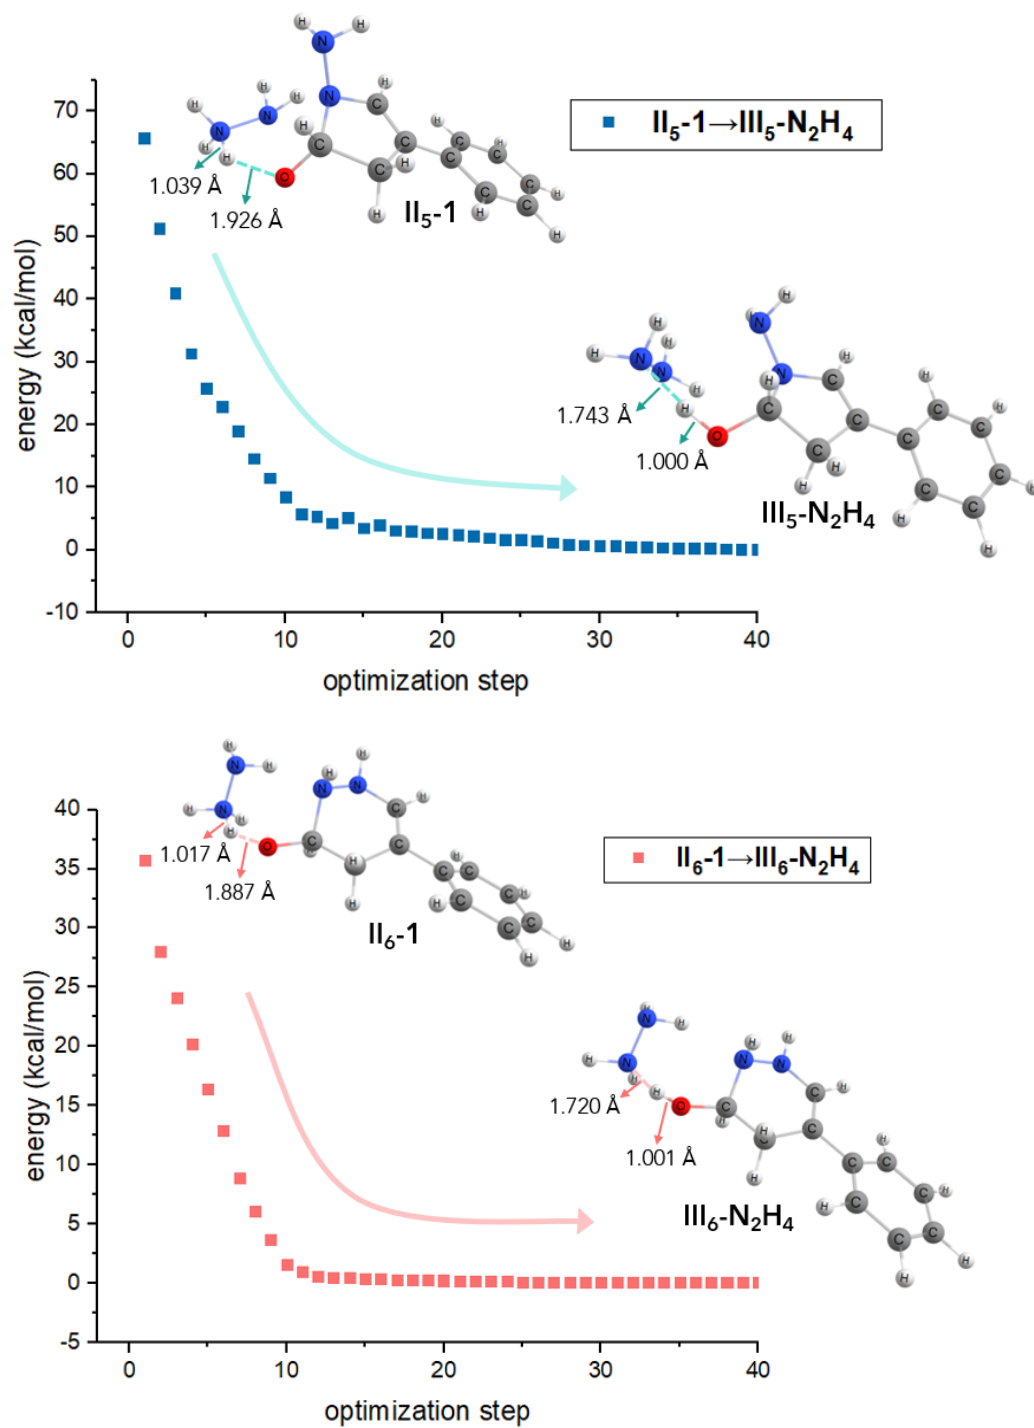

**Figure S5.** Results of structural conversion of II<sub>5</sub>-1 and II<sub>6</sub>-1 to III<sub>5</sub>-N<sub>2</sub>H<sub>4</sub> and III<sub>6</sub>-N<sub>2</sub>H<sub>4</sub> in geometry optimization.

Both II<sub>5</sub>-1 and II<sub>6</sub>-1 converged to III<sub>5</sub>-N<sub>2</sub>H<sub>4</sub> and III<sub>6</sub>-N<sub>2</sub>H<sub>4</sub>, respectively, during the geometry optimization.

With  $\text{N}_2\text{H}_4$

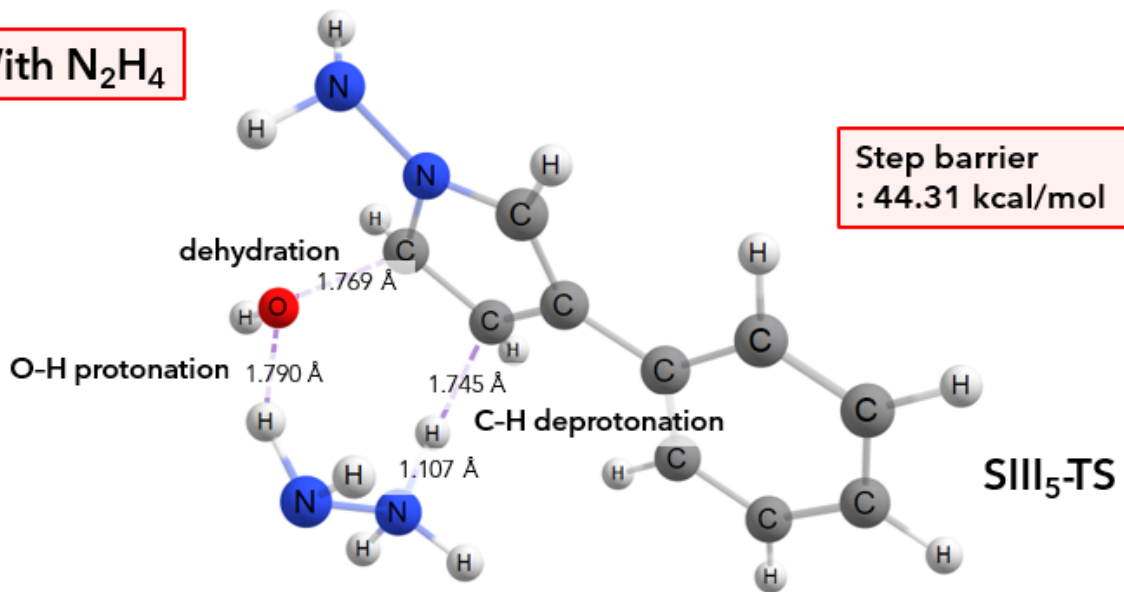

With  $\text{N}_2\text{H}_5^+$

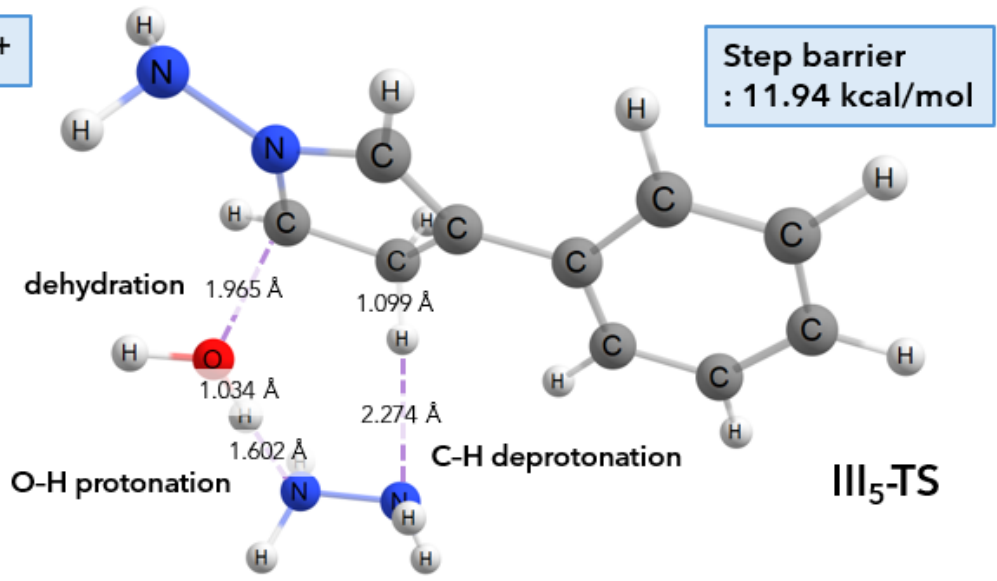

Figure S6. Comparison of dehydration step ( $\text{III}_5 \rightarrow \text{IV}_5$ ) involving  $\text{N}_2\text{H}_4$  (SIII<sub>5</sub>-TS) and  $\text{N}_2\text{H}_5^+$  (III<sub>5</sub>-TS).

Acid assistance is required for the subsequent dehydration step ( $\text{III}_5 \rightarrow \text{IV}_5$ ), as the calculated barrier decreases from 44.3 kcal/mol in the absence of acid assistance to 11.9 kcal/mol in the presence of hydrazinium salts.

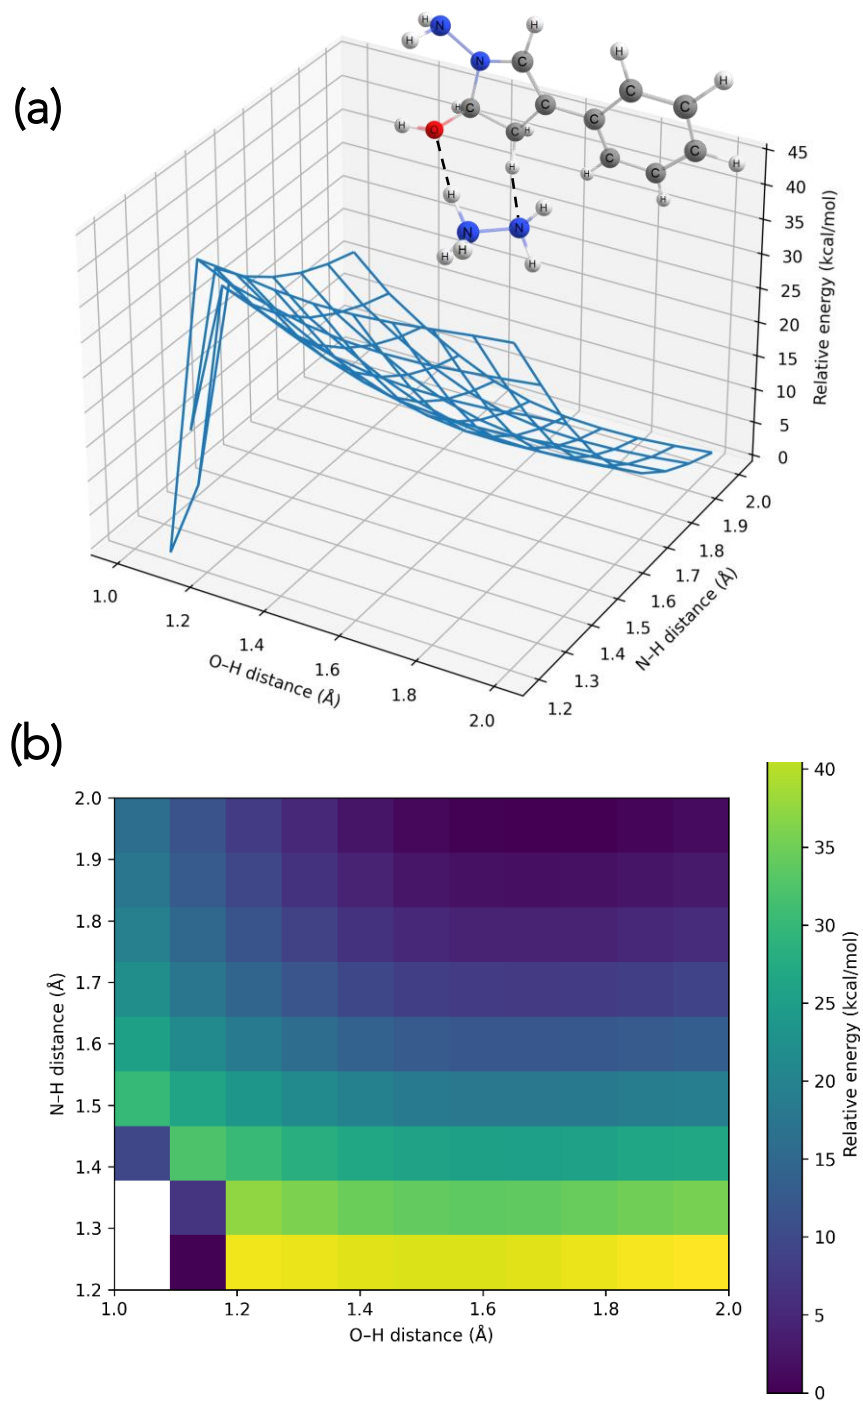

**Figure S7.** Validation of the dehydration transition-state assignment using two-dimensional relaxed scans. (a) 3D wireframe plot and (b) energy heatmap of the relaxed potential energy surface along the proton-transfer and water-elimination coordinates. The scans were performed using the LooseOpt keyword.

Two-dimensional relaxed scans were performed along the proton-transfer and water-elimination coordinates to examine the dehydration region (**Figure S7**). The resulting surfaces indicate that this region is highly sensitive to local electrostatic stabilization after water elimination, leading to abrupt stabilization in the product-like region rather than a smooth, well-separated concerted pathway. Concerted TS-like structures relaxed toward the corresponding stepwise intermediate upon further optimization. Therefore, the dehydration/proton-transfer sequence is best described as a stepwise dehydration process followed by rapid, essentially barrierless N–H deprotonation.

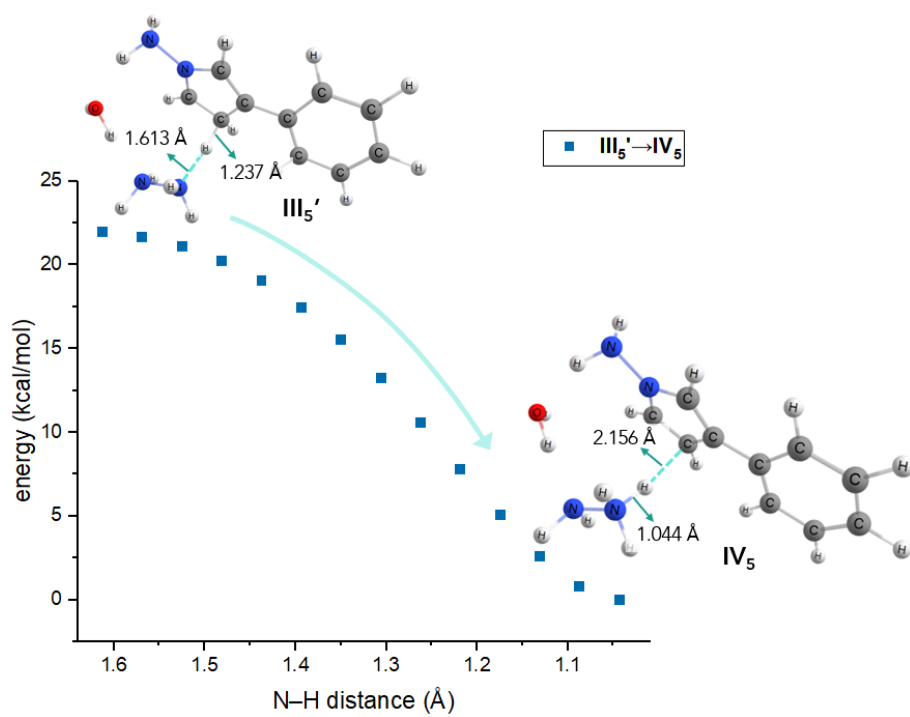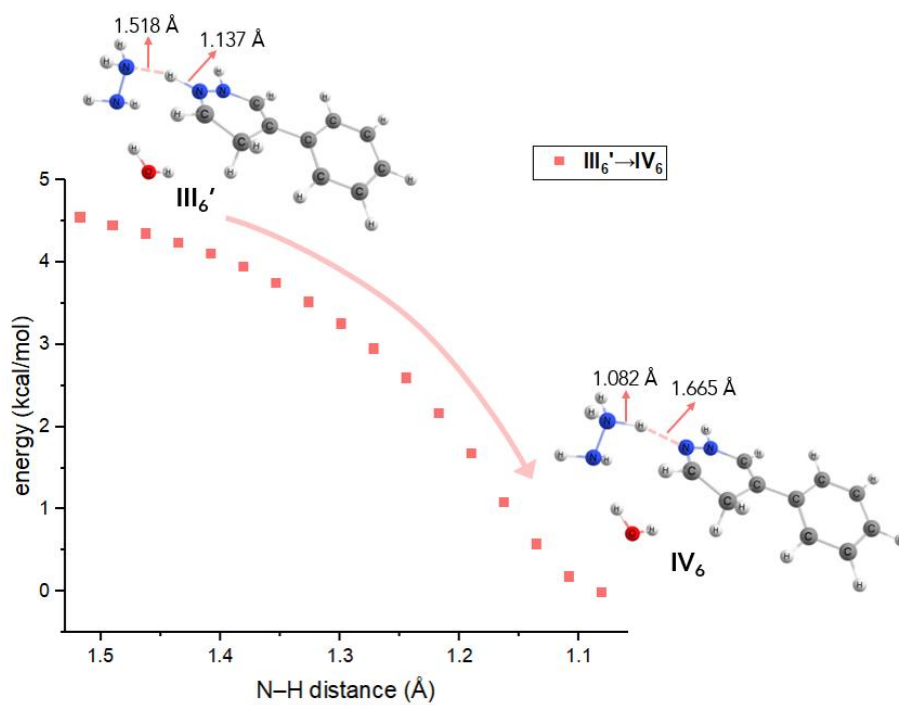

**Figure S8.** Potential energy surface (PES) scan of the conversion from **III<sub>5</sub>'** and **III<sub>6</sub>'** to **IV<sub>5</sub>** and **IV<sub>6</sub>**.

During the PES scan, **III<sub>5</sub>'** and **III<sub>6</sub>'** converged to **IV<sub>5</sub>** and **IV<sub>6</sub>**, respectively.

## V. Mechanistic Studies

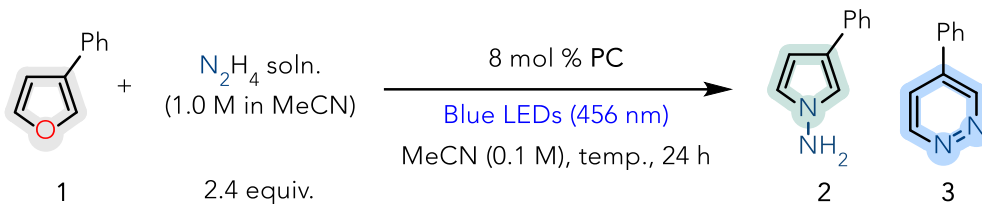

**General procedure for the control experiments to determine ring topology.** In an  $\text{N}_2$ -filled glovebox, 3-phenylfuran **1** (0.1 mmol, 1.0 equiv.), photocatalyst (0.008 mmol, 0.08 equiv.), and proper reagent were added to an oven-dried 4 mL vial. After the addition of the proper reagent, acetonitrile was added to the vial. A magnetic stir bar was charged, sealed with a screw cap and electrical tape, then removed from the glovebox. Under an  $\text{N}_2$  atmosphere, hydrazine solution (1.0 M in MeCN) (0.24 mL, 2.4 equiv.) was added to the vial, and the mixture was stirred for 24 h under irradiation with Kessil™ PR160L 456 nm blue lamps (40 W, 100% intensity) using a household fan. After completion, about 10 mg of 1,3,5-trimethoxybenzene was added to the reaction mixture under an ambient atmosphere. Then, an aliquot of 0.05 mL of the resulting crude mixture was taken and directly transferred to an NMR tube. An additional 0.6 mL of  $\text{CDCl}_3$  was added to the NMR cell, and the crude yield was analyzed by either 400 MHz or 500 MHz  $^1\text{H}$  NMR spectroscopy using 1,3,5-trimethoxybenzene as an internal standard. The relaxation delay (d1), scan numbers (ns), and dummy scans (ds) were set to 20 seconds, 3 scans, and 1 scan, respectively, to accurately quantify the yield using  $^1\text{H}$  NMR spectra.

**Table S10.** Control experiment for ring topology.

| Entry          | Photocatalyst | Temperature | <sup>1</sup> H NMR Yield of <b>2</b> (%) | <sup>1</sup> H NMR Yield of <b>3</b> (%) | Unreacted furan <b>1</b> (%) |
|----------------|---------------|-------------|------------------------------------------|------------------------------------------|------------------------------|
| 1              | <b>PC1</b>    | 23 °C       | 6                                        | 11                                       | 37                           |
| 2              | <b>PC2</b>    | 23 °C       | 7                                        | 44                                       | 0                            |
| 3 <sup>a</sup> | <b>PC1</b>    | 23 °C       | 0                                        | 13                                       | 75                           |
| 4 <sup>a</sup> | <b>PC2</b>    | 23 °C       | 0                                        | 48                                       | 0                            |
| 5              | <b>PC1</b>    | 80 °C       | 71                                       | 16                                       | 7                            |
| 6              | <b>PC2</b>    | 80 °C       | 69                                       | 21                                       | 0                            |
| 7 <sup>a</sup> | <b>PC1</b>    | 80 °C       | 31                                       | 32                                       | 6                            |
| 8 <sup>a</sup> | <b>PC2</b>    | 80 °C       | 4                                        | 28                                       | 36                           |

<sup>a</sup> Use 1.0 equiv. of Na<sub>2</sub>S<sub>2</sub>O<sub>3</sub> · 5H<sub>2</sub>O with MeCN:H<sub>2</sub>O (4:1) as a solvent.

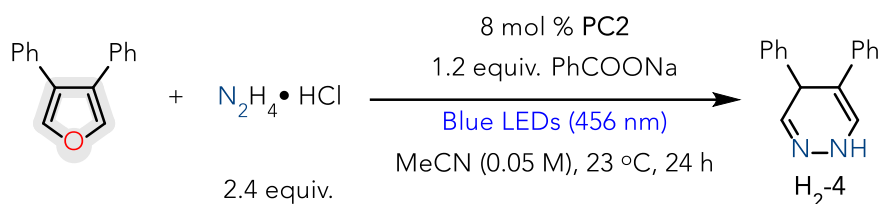

**General procedure for the H<sub>2</sub>-4 synthesis.** In an N<sub>2</sub>-filled glovebox, an oven-dried 4 mL vial was charged with 3,4-diphenyl furan (0.1 mmol, 1.0 equiv.), hydrazine monohydrochloride (0.24 mmol, 2.4 equiv.), and sodium benzoate (0.12 mmol, 1.2 equiv.), followed by 8 mol % of **PC2** (0.008 mmol, 0.08 equiv.). After the addition of the proper reagent, acetonitrile (2.0 mL) was added to the vial. A magnetic stir bar was charged, sealed with a screw cap and electrical tape, then removed from the glovebox. The reaction mixture was stirred for 24 h under irradiation at 23 °C with Kessil™ PR160L 456 nm blue lamps (40 W, 100% intensity) using a household fan. After completion, the crude mixture was concentrated under reduced pressure, then purified with silica gel flash column chromatography to afford the **H<sub>2</sub>-4**.

#### 4,5-diphenyl-1,4-dihydropyridazine (**H<sub>2</sub>-4**)

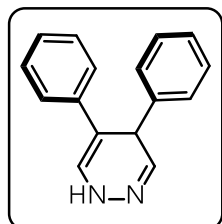

Light yellow solid (21.3 mg, 91%); Purified by silica chromatography with EtOAc/*n*-hexane (1:4) eluent; **<sup>1</sup>H NMR (600 MHz, DMSO-*d*<sub>6</sub>)** δ 9.57 (d, *J* = 3.9 Hz, 1H), 7.33 – 7.26 (m, 7H), 7.21 – 7.17 (m, 3H), 7.05 (t, *J* = 7.3 Hz, 1H), 6.71 (d, *J* = 4.3 Hz, 1H), 4.61 (d, *J* = 4.3 Hz, 1H); **<sup>13</sup>C{<sup>1</sup>H} NMR (151 MHz, DMSO-*d*<sub>6</sub>)** δ 143.13, 137.68, 135.40, 128.78, 128.32, 127.21, 126.67, 125.62, 125.13, 123.38, 103.65; **HRMS** (ESI) *m/z* calcd. for C<sub>16</sub>H<sub>14</sub>N<sub>2</sub> [M+H]<sup>+</sup>: 235.1230, found: 235.1238; Solid-state structure and its absolute configuration was characterized by X-ray diffraction analysis (CCDC 2554883).

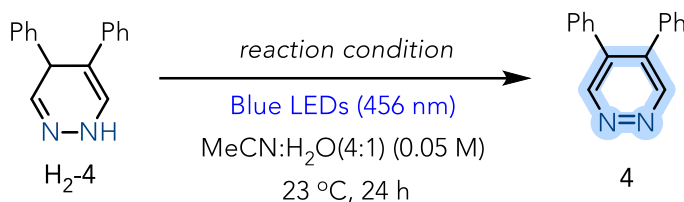

#### General procedure for the control experiments: synthesis of pyridazine **4** from **H<sub>2</sub>-4**.

In an N<sub>2</sub>-filled glovebox, **H<sub>2</sub>-4** (0.03 mmol, 1.0 equiv.), and proper reagents were added to an oven-dried 4 mL vial. After the addition of the proper reagent, acetonitrile was added to the vial. A magnetic stir bar was charged, sealed with a screw cap and electrical tape, then removed from the glovebox. Under an N<sub>2</sub> atmosphere, degassed water (0.4 mL) was added to the vial, and the mixture was stirred for 24 h under irradiation at 23 °C with Kessil™ PR160L 456 nm blue lamps (40 W, 100% intensity) using a household fan. After completion, about 5 mg of 1,3,5-trimethoxybenzene was added to the reaction mixture under an ambient atmosphere. Then, an aliquot of 0.05 mL of the resulting crude mixture was taken and directly transferred to an NMR tube. An additional 0.6 mL of DMSO-*d*<sub>6</sub> was added to the NMR cell, and the crude yield was analyzed by either 400 MHz or 500 MHz <sup>1</sup>H NMR spectroscopy using 1,3,5-trimethoxybenzene as an internal standard. The relaxation delay (d1), scan numbers (ns), and dummy scans (ds)

were set to 20 seconds, 3 scans, and 1 scan, respectively, to accurately quantify the yield using  $^1\text{H}$  NMR spectra.

**Table S11.** Control experiments for pyridazine synthesis

| Entry | Deviation from optimal conditions                                                         | $^1\text{H}$ NMR Yield of <b>4</b> (%) | Unreacted <b>H<sub>2</sub>-4</b> (%) |
|-------|-------------------------------------------------------------------------------------------|----------------------------------------|--------------------------------------|
| 1     | none                                                                                      | 99                                     | 0                                    |
| 2     | MeCN                                                                                      | 3                                      | 66                                   |
| 3     | dark                                                                                      | 0                                      | 99                                   |
| 4     | 8 mol % <b>PC2</b>                                                                        | 6                                      | 0                                    |
| 5     | 20 mol % $\text{Na}_2\text{S}_2\text{O}_3 \cdot 5\text{H}_2\text{O}$                      | 80                                     | 27                                   |
| 6     | 8 mol % <b>PC2</b> , 20 mol % $\text{Na}_2\text{S}_2\text{O}_3 \cdot 5\text{H}_2\text{O}$ | 29                                     | 0                                    |

### UV-Vis Absorption Analysis

**General procedure for the UV-Vis measurement of **H<sub>2</sub>-4** and **4**.** Acetonitrile ( $\text{CH}_3\text{CN}$ ) was used from SPS, followed by drying under 3 Å molecular sieves. All vials and quartz cells were dried in an oven prior to use. In an  $\text{N}_2$ -filled glovebox, 208, 104, 52, 26, and 13  $\mu\text{M}$  of **H<sub>2</sub>-4** and **4** solutions in acetonitrile are prepared and transferred to a custom-made fluorescence 10 mm cuvette cell with J-Young valves. The UV-Vis absorbance was measured with freshly made samples.

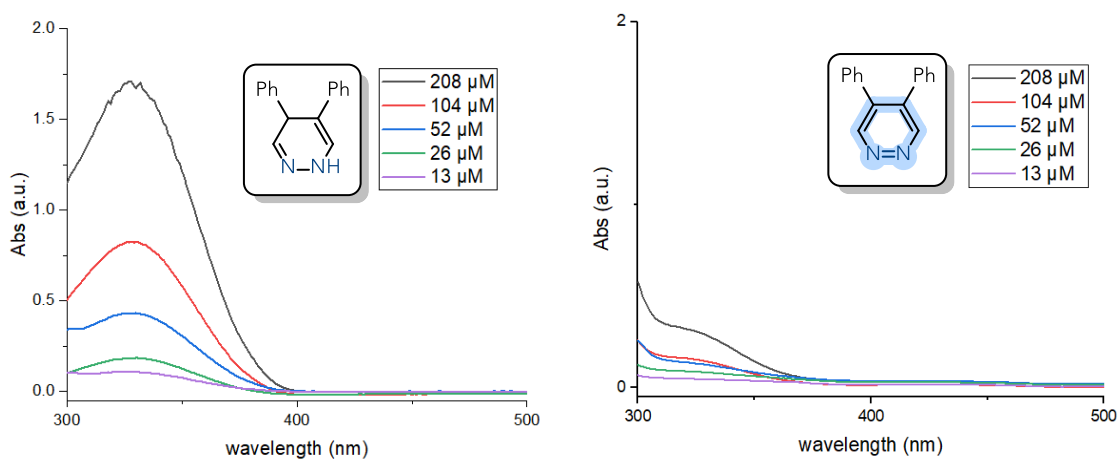

**Figure S9.** UV-vis absorption spectra of **H<sub>2</sub>-4** (left) and **4** (right). \*The sample was measured with a custom-made fluorescence 10 mm cuvette cell with J-Young valves in degassed acetonitrile.

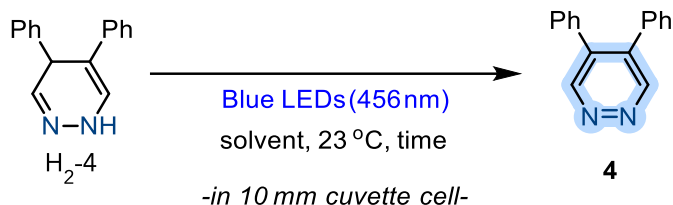

**General procedure for the UV-Vis analysis of H<sub>2</sub>-4 after irradiation.** Acetonitrile (CH<sub>3</sub>CN) was used from SPS, followed by drying under 3 Å molecular sieves. All vials and quartz cells were dried in an oven prior to use. In an N<sub>2</sub>-filled glovebox, 104 μM of H<sub>2</sub>-4 solutions in acetonitrile are prepared and transferred to a custom-made fluorescence 10 mm cuvette cell with J-Young valves. Under an N<sub>2</sub> atmosphere, degassed water was added to a custom-made fluorescence 10 mm cuvette cell with J-Young valves, and the mixture was irradiated at 23 °C with Kessil™ PR160L 456 nm blue lamps (40 W, 100% intensity) using a household fan.

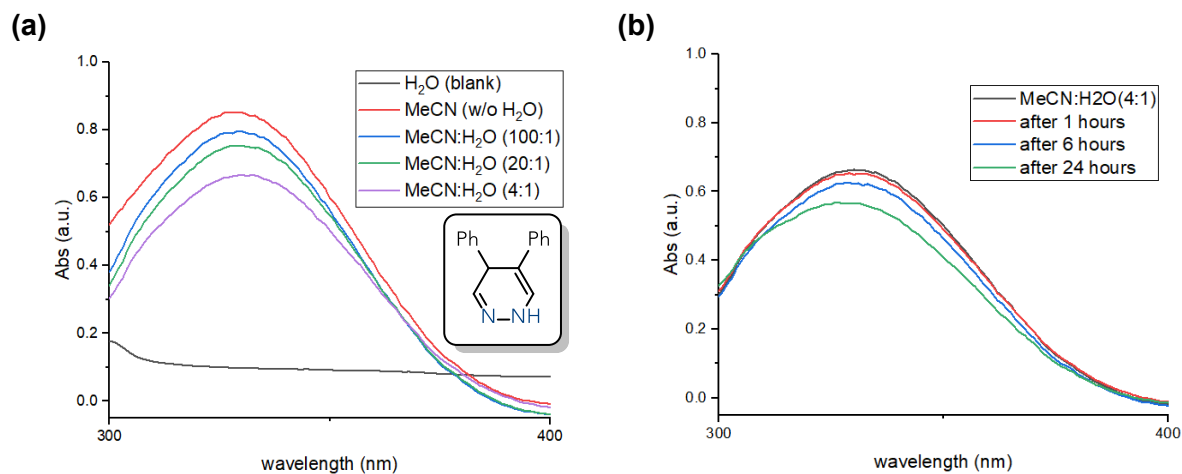

**Figure S10.** (a) UV-vis absorption spectra of H<sub>2</sub>-4 in MeCN, and MeCN:H<sub>2</sub>O. (b) UV-vis absorption spectra of H<sub>2</sub>-4 in MeCN:H<sub>2</sub>O (4:1) under 456 nm Blue LEDs irradiation in different time intervals. \*The sample was measured with a custom-made fluorescence 10 mm cuvette cell with J-Young valves in degassed acetonitrile, and N<sub>2</sub>-bubbled water.

## VI. Crystallographic Data

### 1. Data for 2 (CCDC 2554884)

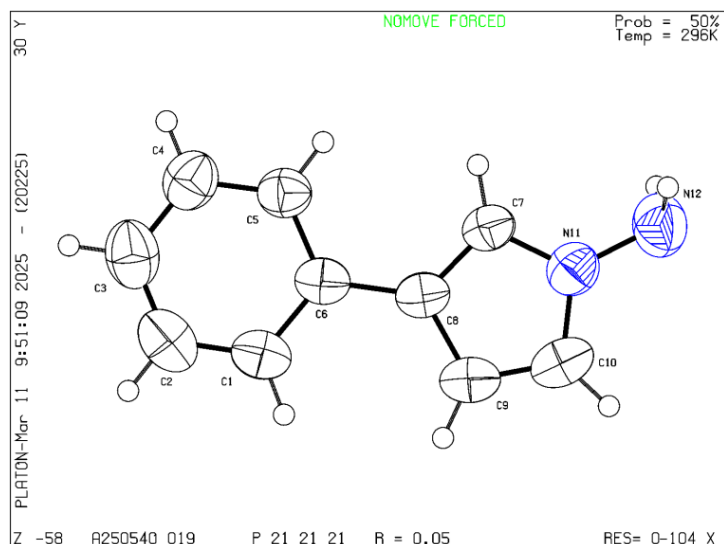

Figure S11. CheckCIF copy for 2.

Table S12. Crystal data and structure refinement for 2.

|                                   |                                                                                             |
|-----------------------------------|---------------------------------------------------------------------------------------------|
| Empirical formula                 | C <sub>10</sub> H <sub>10</sub> N <sub>2</sub>                                              |
| Formula weight                    | 158.20                                                                                      |
| Temperature                       | 296(2) K                                                                                    |
| Wavelength                        | 0.71073 Å                                                                                   |
| Crystal system                    | Orthorhombic                                                                                |
| Space group                       | <i>P</i> 2 <sub>1</sub> 2 <sub>1</sub> 2 <sub>1</sub>                                       |
| Unit cell dimensions              | a = 5.8167(4) Å<br>b = 7.6196(6) Å<br>c = 19.0009(16) Å<br>α = 90 °<br>β = 90 °<br>γ = 90 ° |
| Volume                            | 842.14(11) Å <sup>3</sup>                                                                   |
| Z                                 | 4                                                                                           |
| Density (calculated)              | 1.248 Mg/m <sup>3</sup>                                                                     |
| Absorption coefficient            | 0.076 mm <sup>-1</sup>                                                                      |
| F(000)                            | 336                                                                                         |
| Crystal size                      | 0.089 x 0.056 x 0.022 mm <sup>3</sup>                                                       |
| Theta range for data collection   | 2.880 to 28.063 °                                                                           |
| Index ranges                      | -7 ≤ h ≤ 7, -10 ≤ k ≤ 10, -25 ≤ l ≤ 25                                                      |
| Reflections collected             | 12298                                                                                       |
| Independent reflections           | 2027 [R(int) = 0.0599]                                                                      |
| Completeness to theta = 25.242 °  | 99.1 %                                                                                      |
| Absorption correction             | Semi-empirical from equivalents                                                             |
| Max. and min. transmission        | 0.7456 and 0.6787                                                                           |
| Refinement method                 | Full-matrix least-squares on F <sup>2</sup>                                                 |
| Data / restraints / parameters    | 2027 / 0 / 115                                                                              |
| Goodness-of-fit on F <sup>2</sup> | 1.102                                                                                       |
| Final R indices [I > 2σ(I)]       | R1 = 0.0531, wR2 = 0.0930                                                                   |
| R indices (all data)              | R1 = 0.1012, wR2 = 0.1113                                                                   |
| Largest diff. peak and hole       | 0.106 and -0.135 e·Å <sup>-3</sup>                                                          |

## 2. Data for H<sub>2</sub>-4 (CCDC 2554883)

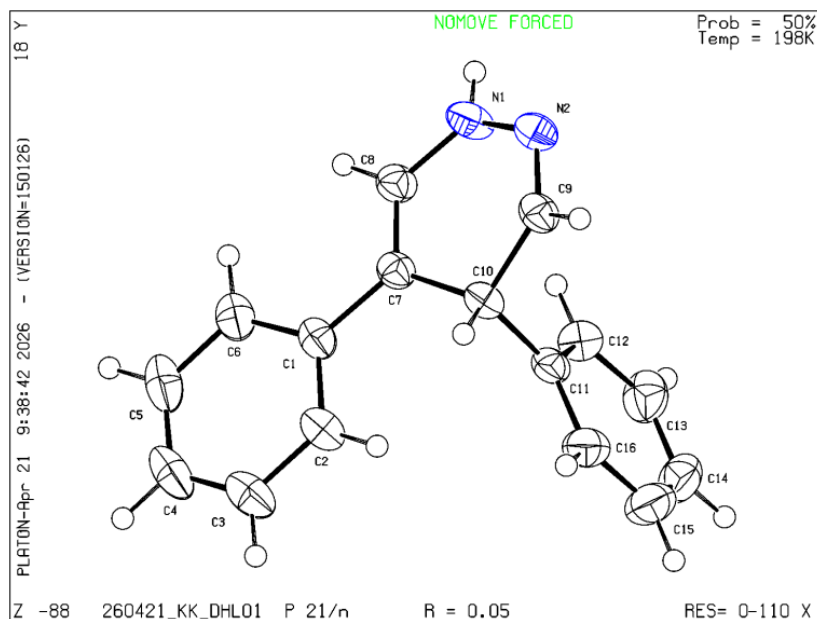

Figure S12. CheckCIF copy for H<sub>2</sub>-4 .

Table S13. Crystal data and structure refinement for H<sub>2</sub>-4 .

|                                   |                                                                                                                                                |
|-----------------------------------|------------------------------------------------------------------------------------------------------------------------------------------------|
| Empirical formula                 | C <sub>16</sub> H <sub>14</sub> N <sub>2</sub>                                                                                                 |
| Formula weight                    | 234.29                                                                                                                                         |
| Temperature                       | 198(2) K                                                                                                                                       |
| Wavelength                        | 0.71073 Å                                                                                                                                      |
| Crystal system                    | Monoclinic                                                                                                                                     |
| Space group                       | <i>P</i> 2 <sub>1</sub> / <i>n</i>                                                                                                             |
| Unit cell dimensions              | <i>a</i> = 13.9944(14) Å<br><i>b</i> = 5.6941(5) Å<br><i>c</i> = 16.6956(19) Å<br>$\alpha$ = 90 °<br>$\beta$ = 112.349(4) °<br>$\gamma$ = 90 ° |
| Volume                            | 1230.5(2) Å <sup>3</sup>                                                                                                                       |
| Z                                 | 4                                                                                                                                              |
| Density (calculated)              | 1.265 Mg/m <sup>3</sup>                                                                                                                        |
| Absorption coefficient            | 0.075 mm <sup>-1</sup>                                                                                                                         |
| F(000)                            | 496                                                                                                                                            |
| Crystal size                      | 0.170 x 0.080 x 0.060 mm <sup>3</sup>                                                                                                          |
| Theta range for data collection   | 2.407 to 26.430 °                                                                                                                              |
| Index ranges                      | -17 ≤ <i>h</i> ≤ 17, -7 ≤ <i>k</i> ≤ 7, -20 ≤ <i>l</i> ≤ 20                                                                                    |
| Reflections collected             | 38751                                                                                                                                          |
| Independent reflections           | 2512 [R(int) = 0.1266]                                                                                                                         |
| Completeness to theta = 25.242 °  | 100.0 %                                                                                                                                        |
| Absorption correction             | Semi-empirical from equivalents                                                                                                                |
| Max. and min. transmission        | 0.7454 and 0.4800                                                                                                                              |
| Refinement method                 | Full-matrix least-squares on F <sup>2</sup>                                                                                                    |
| Data / restraints / parameters    | 2512 / 0 / 163                                                                                                                                 |
| Goodness-of-fit on F <sup>2</sup> | 1.020                                                                                                                                          |
| Final R indices [I > 2σ(I)]       | R1 = 0.0462, wR2 = 0.1230                                                                                                                      |
| R indices (all data)              | R1 = 0.0676, wR2 = 0.1456                                                                                                                      |
| Largest diff. peak and hole       | 0.240 and -0.280 e·Å <sup>-3</sup>                                                                                                             |

### 3. Data for 4 (CCDC 2554882)

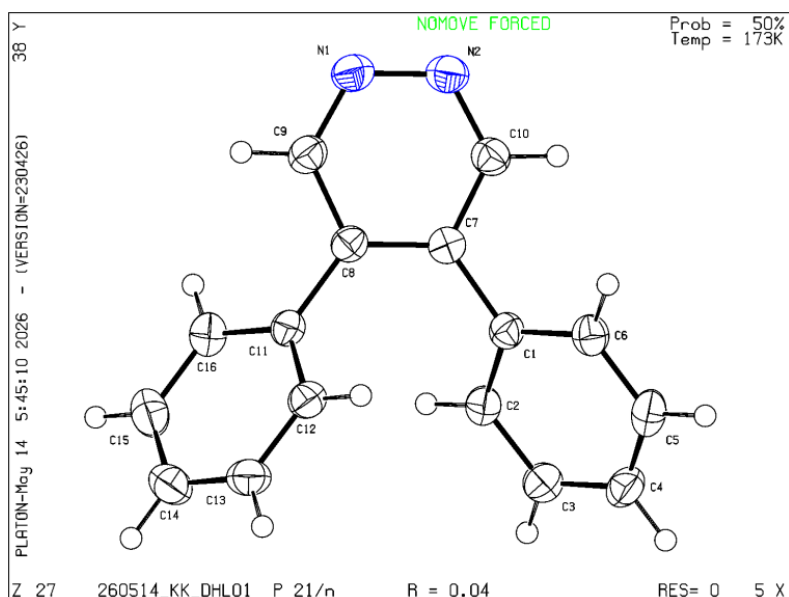

Figure S13. CheckCIF copy for 4.

Table S14. Crystal data and structure refinement for 4.

|                                   |                                                                                                  |
|-----------------------------------|--------------------------------------------------------------------------------------------------|
| Empirical formula                 | C <sub>16</sub> H <sub>12</sub> N <sub>2</sub>                                                   |
| Formula weight                    | 232.28                                                                                           |
| Temperature                       | 173(2) K                                                                                         |
| Wavelength                        | 0.71073 Å                                                                                        |
| Crystal system                    | Monoclinic                                                                                       |
| Space group                       | <i>P</i> 2 <sub>1</sub> / <i>n</i>                                                               |
| Unit cell dimensions              | a = 6.5221(3) Å<br>b = 12.6675(7) Å<br>c = 14.7843(8) Å<br>α = 90°<br>β = 100.902(2)°<br>γ = 90° |
| Volume                            | 1199.41(11) Å <sup>3</sup>                                                                       |
| Z                                 | 4                                                                                                |
| Density (calculated)              | 1.286 Mg/m <sup>3</sup>                                                                          |
| Absorption coefficient            | 0.077 mm <sup>-1</sup>                                                                           |
| F(000)                            | 488                                                                                              |
| Crystal size                      | 0.150 x 0.070 x 0.070 mm <sup>3</sup>                                                            |
| Theta range for data collection   | 2.806 to 26.401°                                                                                 |
| Index ranges                      | -8 ≤ h ≤ 8, -15 ≤ k ≤ 15, -18 ≤ l ≤ 18                                                           |
| Reflections collected             | 28739                                                                                            |
| Independent reflections           | 2459 [R(int) = 0.0688]                                                                           |
| Completeness to theta = 25.242°   | 99.9 %                                                                                           |
| Absorption correction             | Semi-empirical from equivalents                                                                  |
| Max. and min. transmission        | 0.7454 and 0.7094                                                                                |
| Refinement method                 | Full-matrix least-squares on F <sup>2</sup>                                                      |
| Data / restraints / parameters    | 2459 / 0 / 164                                                                                   |
| Goodness-of-fit on F <sup>2</sup> | 1.013                                                                                            |
| Final R indices [I > 2σ(I)]       | R1 = 0.0357, wR2 = 0.1117                                                                        |
| R indices (all data)              | R1 = 0.0420, wR2 = 0.1210                                                                        |
| Largest diff. peak and hole       | 0.184 and -0.159 e·Å <sup>-3</sup>                                                               |

#### 4. Data for 45 (CCDC 2554885)

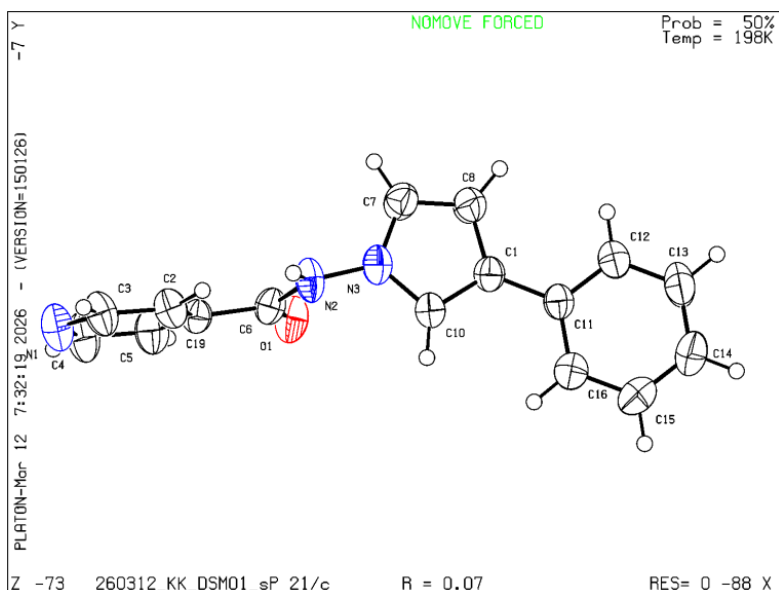

**Figure S14.** CheckCIF copy for **45**.

**Table S15.** Crystal data and structure refinement for **45**.

|                                   |                                                                                                     |
|-----------------------------------|-----------------------------------------------------------------------------------------------------|
| Empirical formula                 | C <sub>16</sub> H <sub>13</sub> N <sub>3</sub> O                                                    |
| Formula weight                    | 263.29                                                                                              |
| Temperature                       | 198(2) K                                                                                            |
| Wavelength                        | 0.71073 Å                                                                                           |
| Crystal system                    | Monoclinic                                                                                          |
| Space group                       | <i>P</i> 2 <sub>1</sub> / <i>c</i>                                                                  |
| Unit cell dimensions              | a = 9.7927(6) Å<br>b = 9.7276(7) Å<br>c = 19.7920(14) Å<br>α = 90 °<br>β = 103.471(2) °<br>γ = 90 ° |
| Volume                            | 1833.5(2) Å <sup>3</sup>                                                                            |
| Z                                 | 4                                                                                                   |
| Density (calculated)              | 1.335 Mg/m <sup>3</sup>                                                                             |
| Absorption coefficient            | 0.506 mm <sup>-1</sup>                                                                              |
| F(000)                            | 728                                                                                                 |
| Crystal size                      | 0.200 x 0.120 x 0.090 mm <sup>3</sup>                                                               |
| Theta range for data collection   | 2.116 to 26.438 °                                                                                   |
| Index ranges                      | -12 ≤ h ≤ 11, -12 ≤ k ≤ 12, -24 ≤ l ≤ 24                                                            |
| Reflections collected             | 44124                                                                                               |
| Independent reflections           | 3779 [R(int) = 0.1043]                                                                              |
| Completeness to theta = 25.242 °  | 100.0 %                                                                                             |
| Absorption correction             | Semi-empirical from equivalents                                                                     |
| Max. and min. transmission        | 0.7454 and 0.5730                                                                                   |
| Refinement method                 | Full-matrix least-squares on F <sup>2</sup>                                                         |
| Data / restraints / parameters    | 3779 / 0 / 184                                                                                      |
| Goodness-of-fit on F <sup>2</sup> | 1.042                                                                                               |
| Final R indices [I > 2σ(I)]       | R1 = 0.0714, wR2 = 0.2372                                                                           |
| R indices (all data)              | R1 = 0.0926, wR2 = 0.2760                                                                           |
| Largest diff. peak and hole       | 0.531 and -0.483 e <sup>-</sup> Å <sup>-3</sup>                                                     |

## VII. NMR Spectral Copies

DSM-06-CDCl3-ISOLATED-avhd400-1H

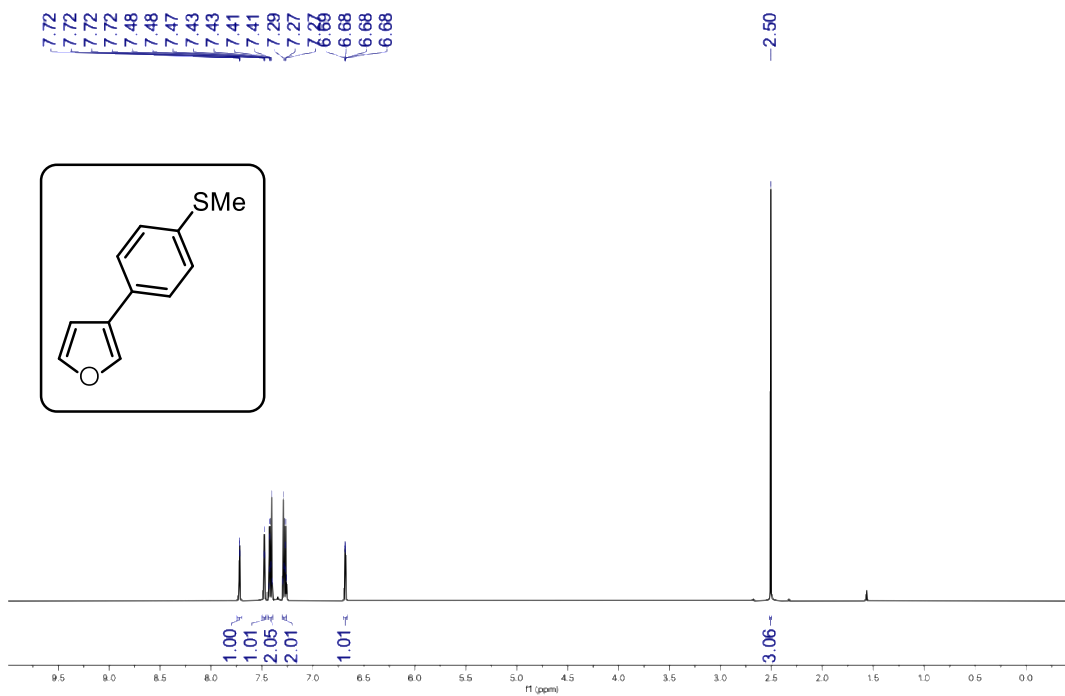

Figure S15. <sup>1</sup>H NMR spectrum of 3-(4-(methylthio)phenyl)furan in CDCl<sub>3</sub> at 25 °C.

DSM-06-ISOLATED-13C-CDCl3-IBS600

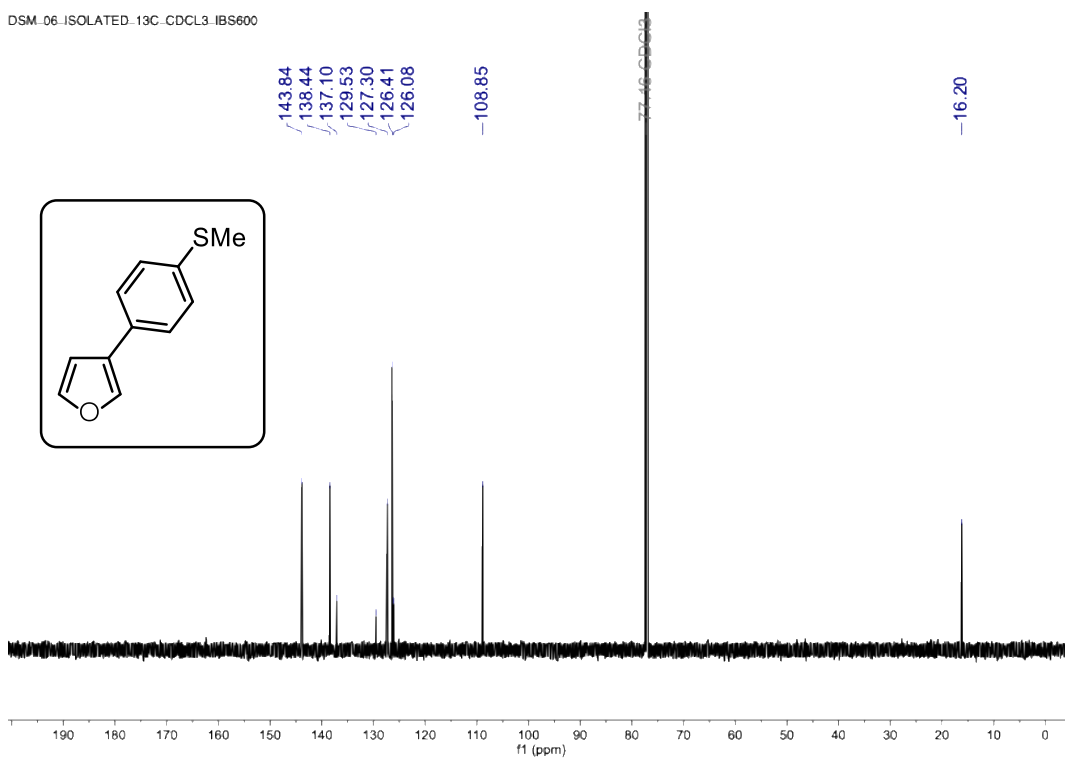

Figure S16. <sup>13</sup>C NMR spectrum of 3-(4-(methylthio)phenyl)furan in CDCl<sub>3</sub> at 25 °C.

DSM-157-ISOLATED-1H-IBS600-CDCL3

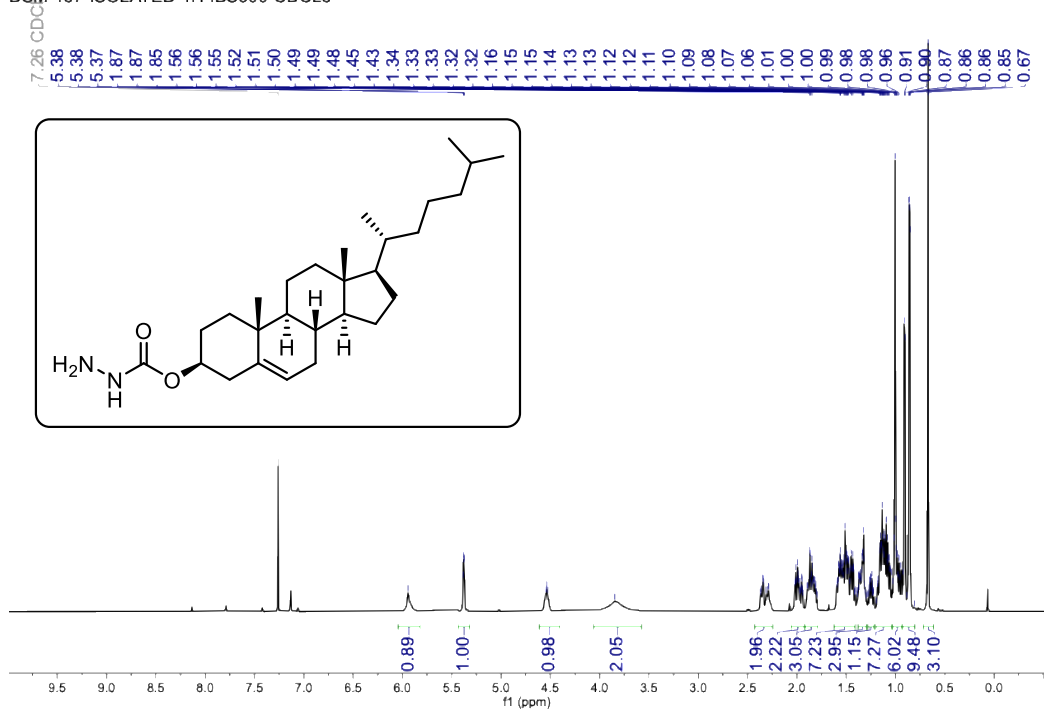

Figure S17. <sup>1</sup>H NMR spectrum of (3*S*,8*S*,9*S*,10*R*,13*R*,14*S*,17*R*)-10,13-dimethyl-17-((*R*)-6-methylheptan-2-yl)-2,3,4,7,8,9,10,11,12,13,14,15,16,17-tetradecahydro-1*H*-cyclopenta[*a*] phenanthren-3-yl hydrazinecarboxylate in CDCl<sub>3</sub> at 25 °C.

DSM-157-ISOLATED-13C-CDCL3

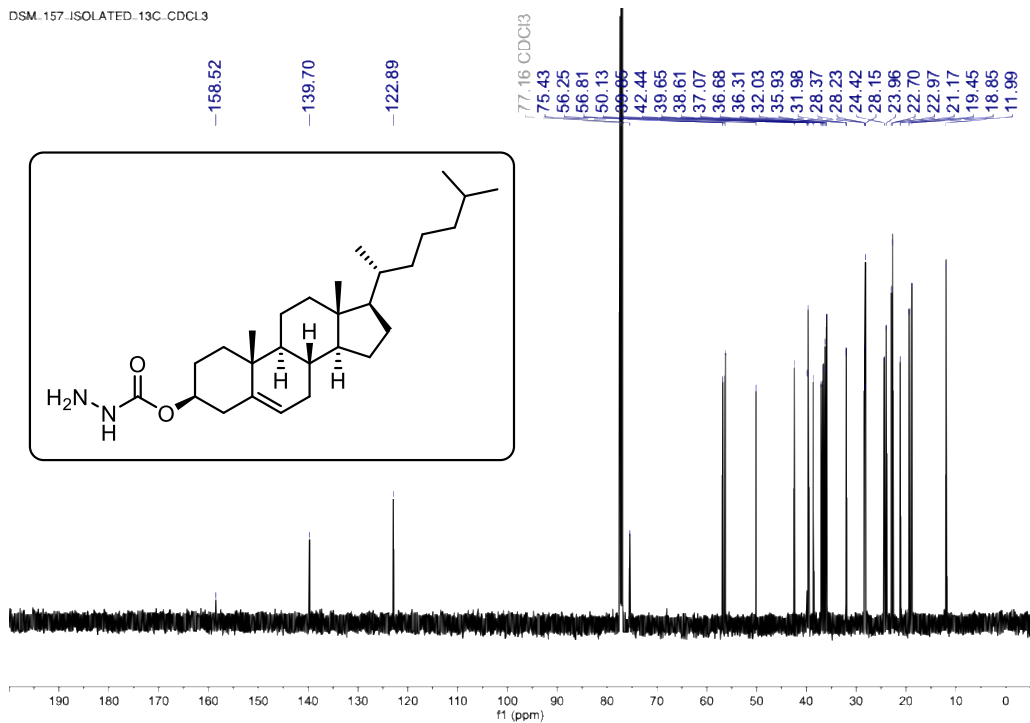

Figure S18. <sup>13</sup>C NMR spectrum of (3*S*,8*S*,9*S*,10*R*,13*R*,14*S*,17*R*)-10,13-dimethyl-17-((*R*)-6-methylheptan-2-yl)-2,3,4,7,8,9,10,11,12,13,14,15,16,17-tetradecahydro-1*H*-cyclopenta[*a*] phenanthren-3-yl hydrazinecarboxylate in CDCl<sub>3</sub> at 25 °C.

DSM-80-ISOLATED-1H-CDCL3-IBS600

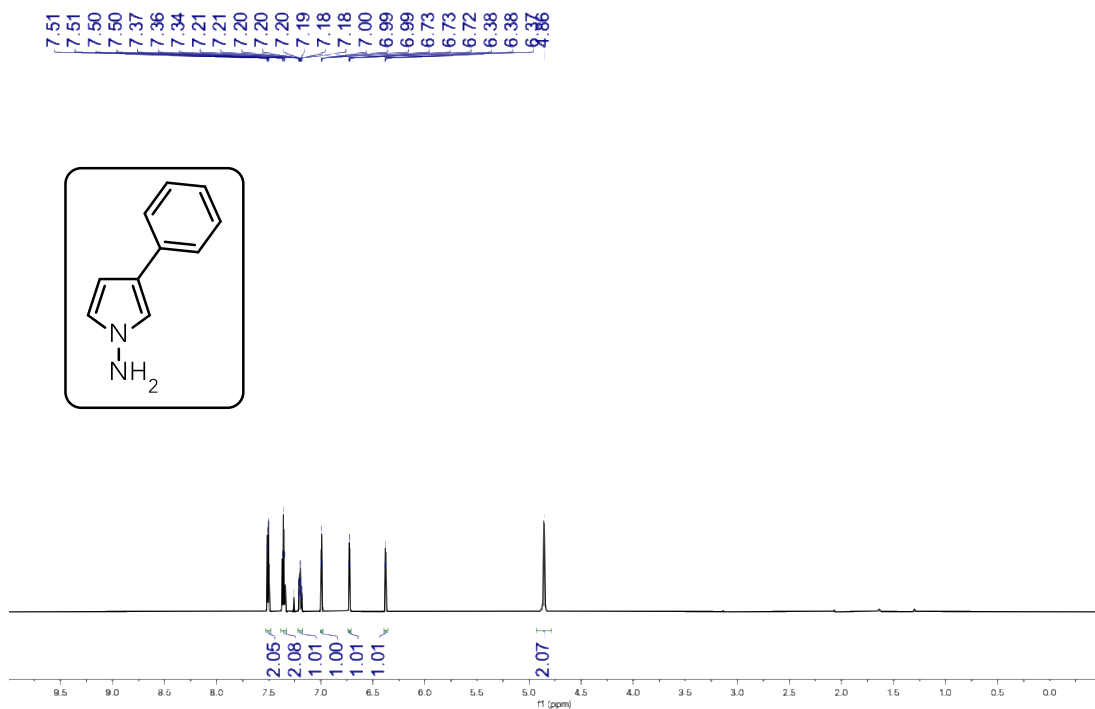

Figure S19. <sup>1</sup>H NMR spectrum of 2 in CDCl<sub>3</sub> at 25 °C.

DSM-80-CDCl3-ISOLATED-13C-IBS600

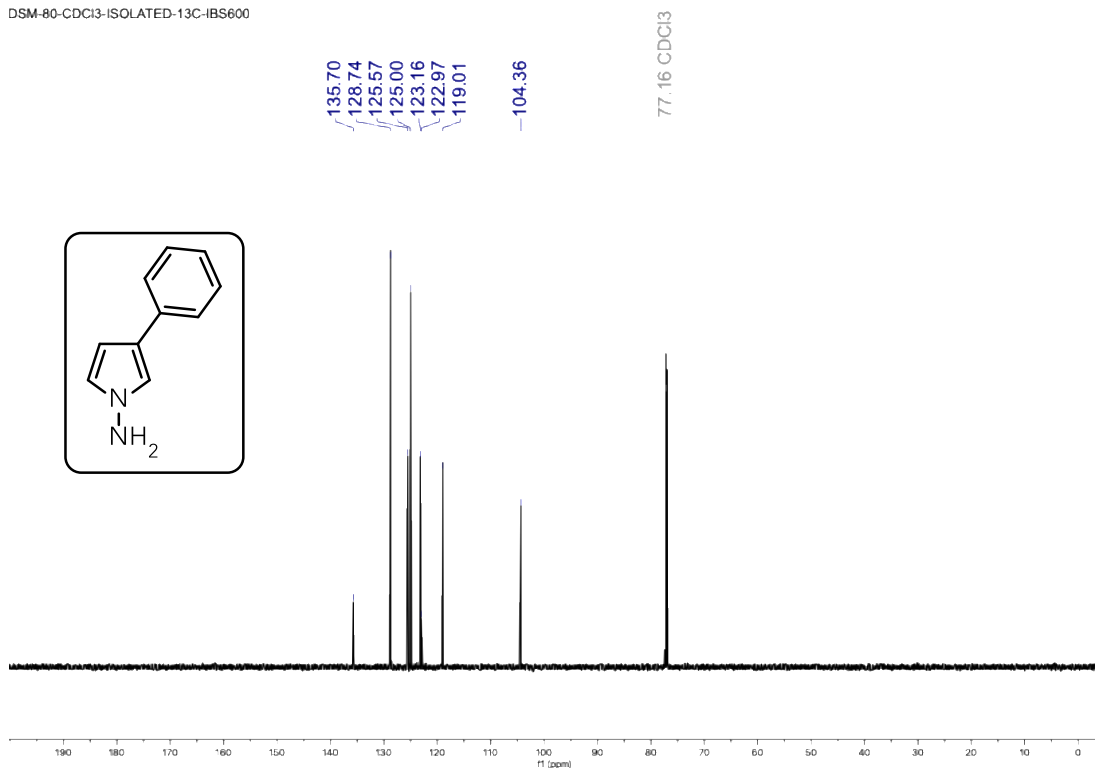

Figure S20. <sup>13</sup>C NMR spectrum of 2 in CDCl<sub>3</sub> at 25 °C.

DHL06-026-col-CDCl3-1HMRV500.347.fid  
DHL06-026-col-CDCl3-1HMRV500

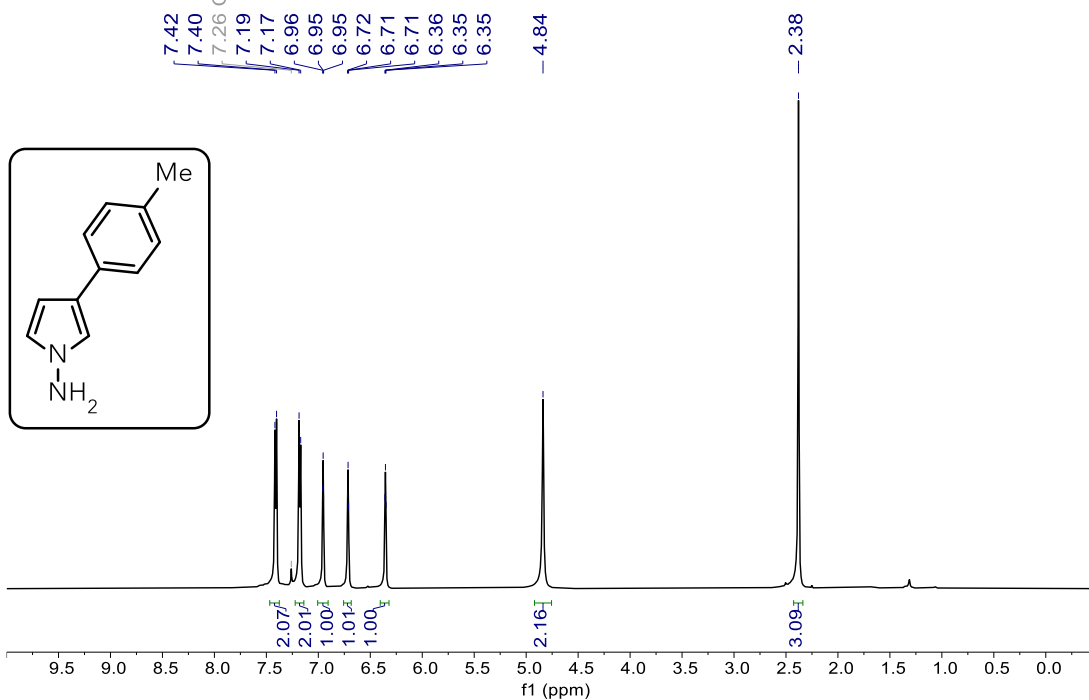

Figure S21. <sup>1</sup>H NMR spectrum of **5** in CDCl<sub>3</sub> at 25 °C.

DHL06-026-col-CDCl3-13CNMRV500.348.fid  
DHL06-026-col-CDCl3-13CNMRV500

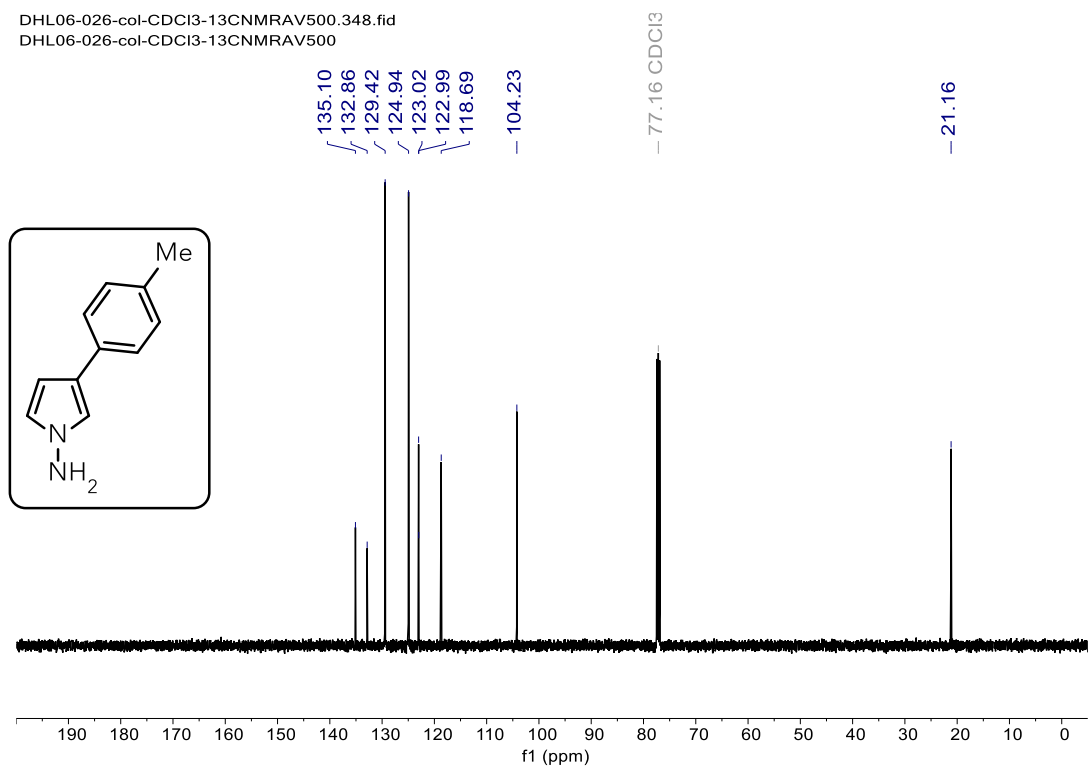

Figure S22. <sup>13</sup>C NMR spectrum of **5** in CDCl<sub>3</sub> at 25 °C.

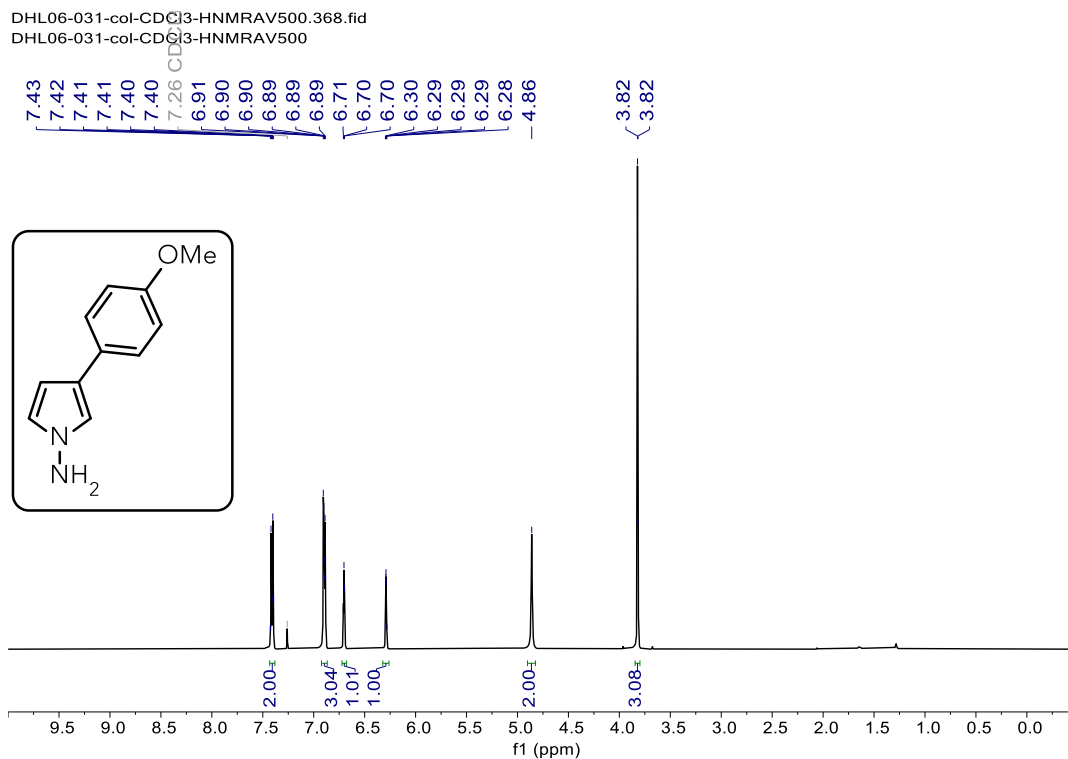

**Figure S23.**  $^1\text{H}$  NMR spectrum of **6** in  $\text{CDCl}_3$  at 25 °C.

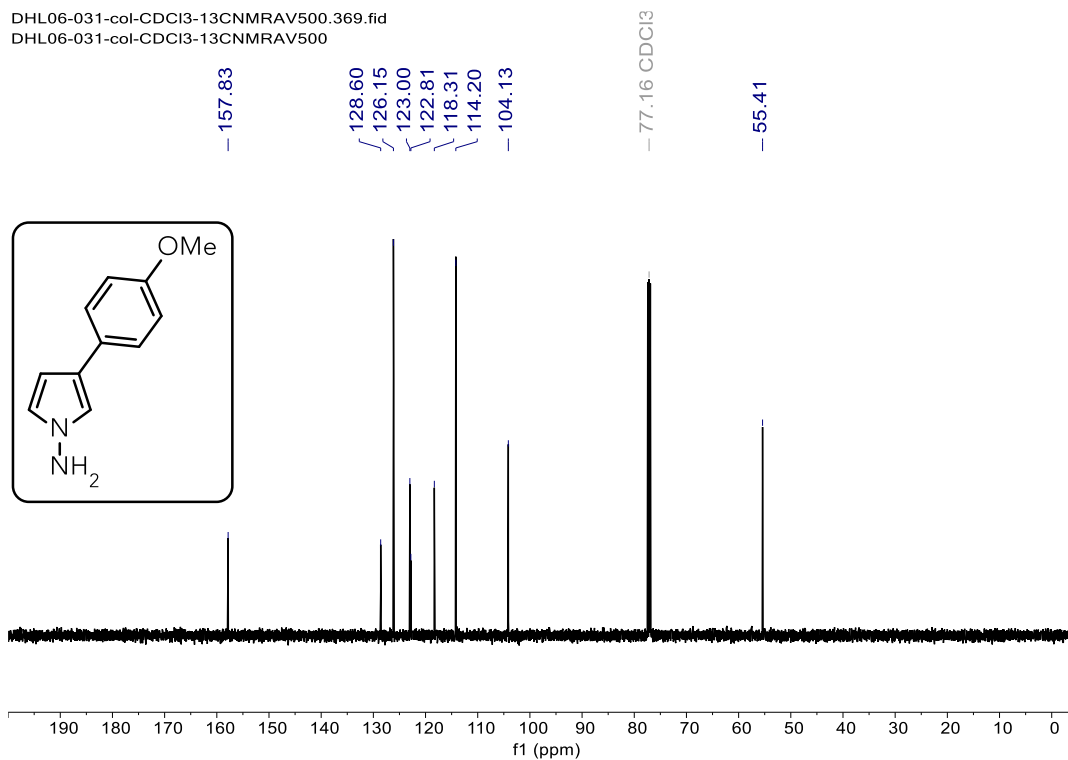

**Figure S24.**  $^{13}\text{C}$  NMR spectrum of **6** in  $\text{CDCl}_3$  at 25 °C.

DHL06-032-col-CDCl3-HNMRV500.370.fid  
DHL06-032-col-CDCl3-HNMRV500

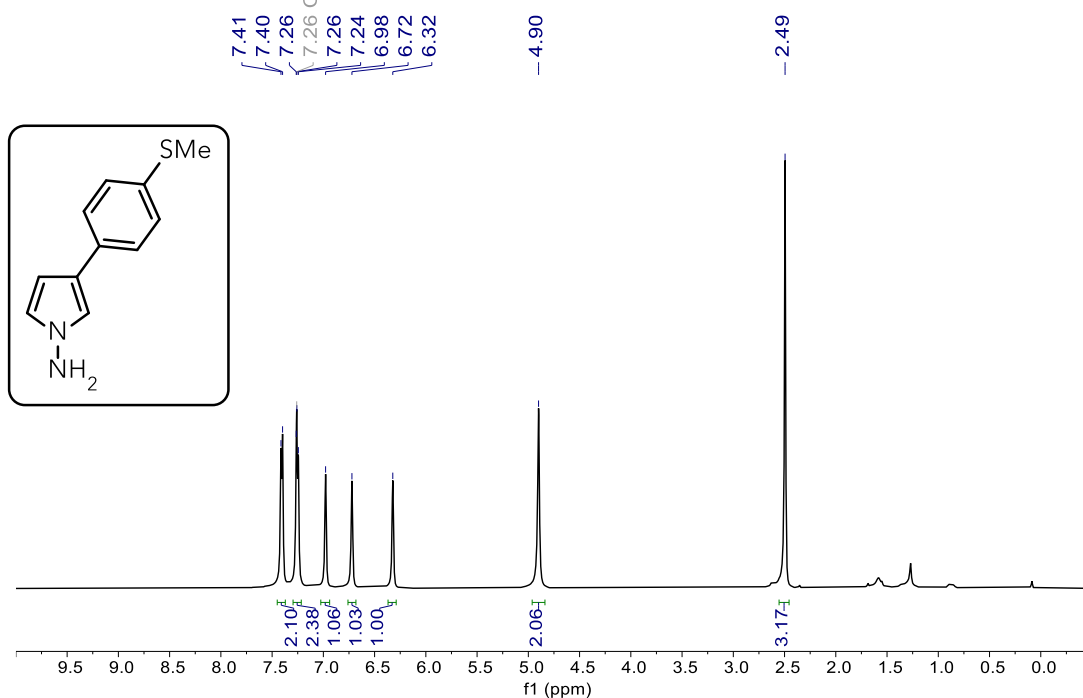

Figure S25.  $^1\text{H}$  NMR spectrum of 7 in  $\text{CDCl}_3$  at 25  $^\circ\text{C}$ .

DHL06-032-col-CDCl3-13CNMRV500.371.fid  
DHL06-032-col-CDCl3-13CNMRV500

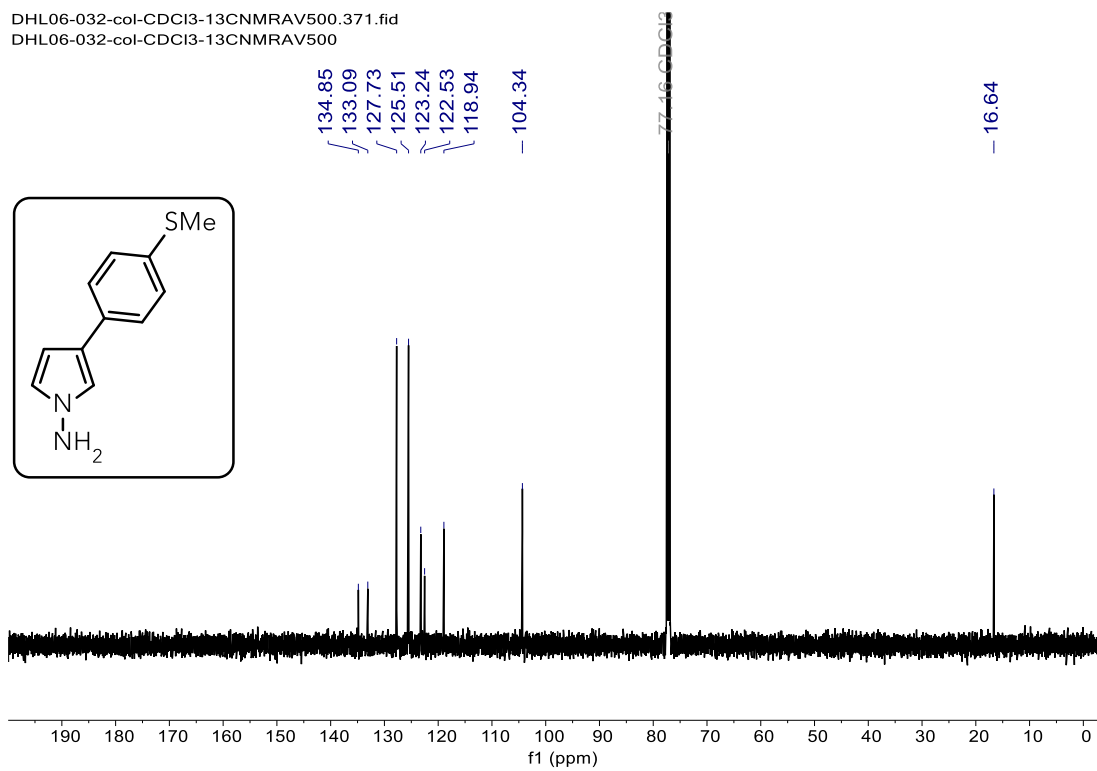

Figure S26.  $^{13}\text{C}$  NMR spectrum of 7 in  $\text{CDCl}_3$  at 25  $^\circ\text{C}$ .

DHL06-033-col-CDCl3-HNMRNEO400.201.fid  
DHL06-033-col-CDCl3-HNMRNEO400

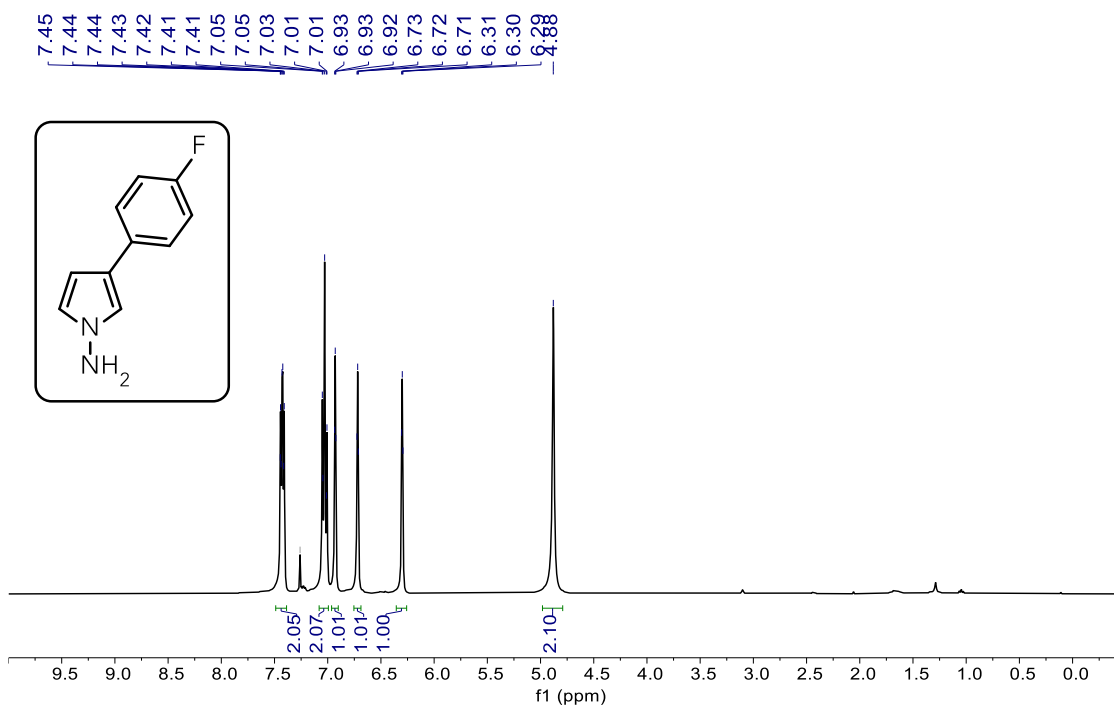

Figure S27.  $^1\text{H}$  NMR spectrum of **8** in  $\text{CDCl}_3$  at 25 °C.

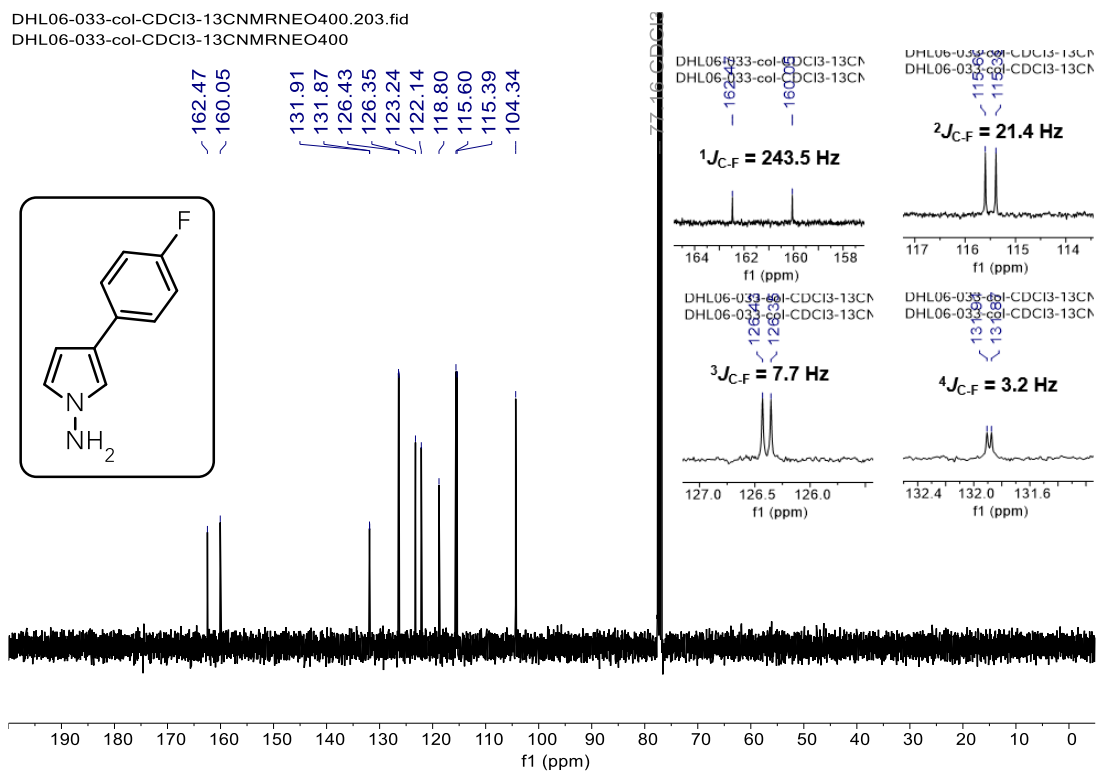

Figure S28.  $^{13}\text{C}$  NMR spectrum of **8** in  $\text{CDCl}_3$  at 25 °C.

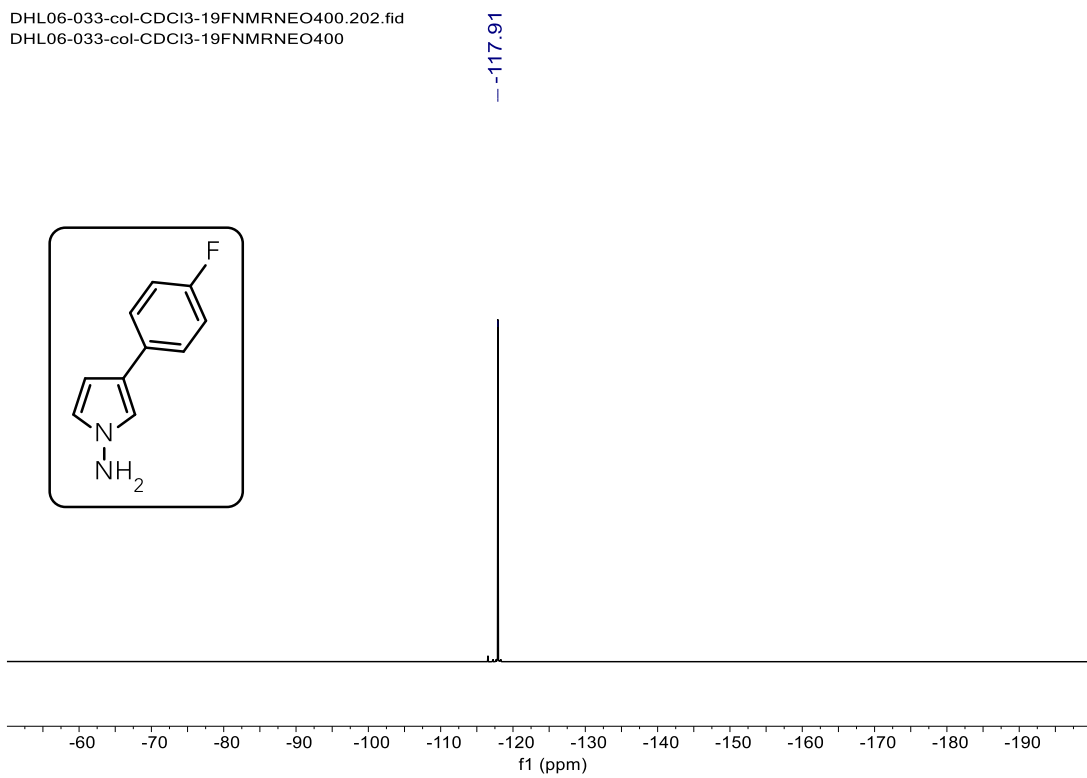

**Figure S29.**  $^{19}\text{F}$  NMR spectrum of **8** in  $\text{CDCl}_3$  at 25 °C.

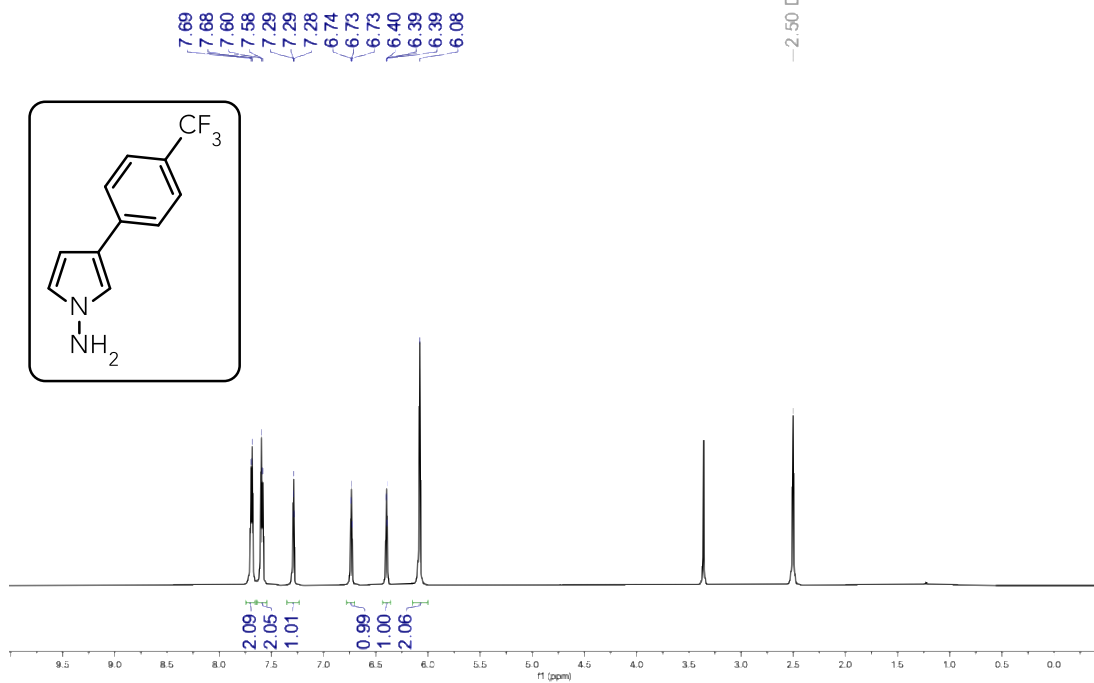

Figure S30. <sup>1</sup>H NMR spectrum of **9** in DMSO-d<sub>6</sub> at 25 °C.

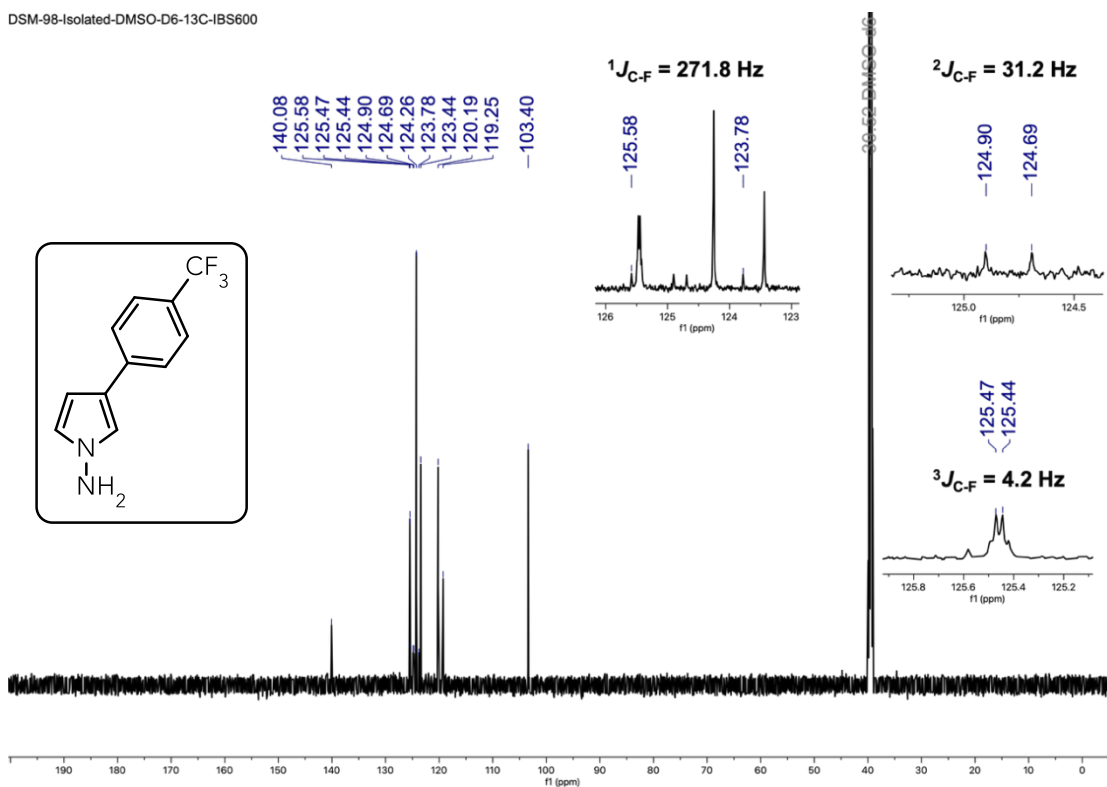

Figure S31. <sup>13</sup>C NMR spectrum of **9** in DMSO-d<sub>6</sub> at 25 °C.

-60.51

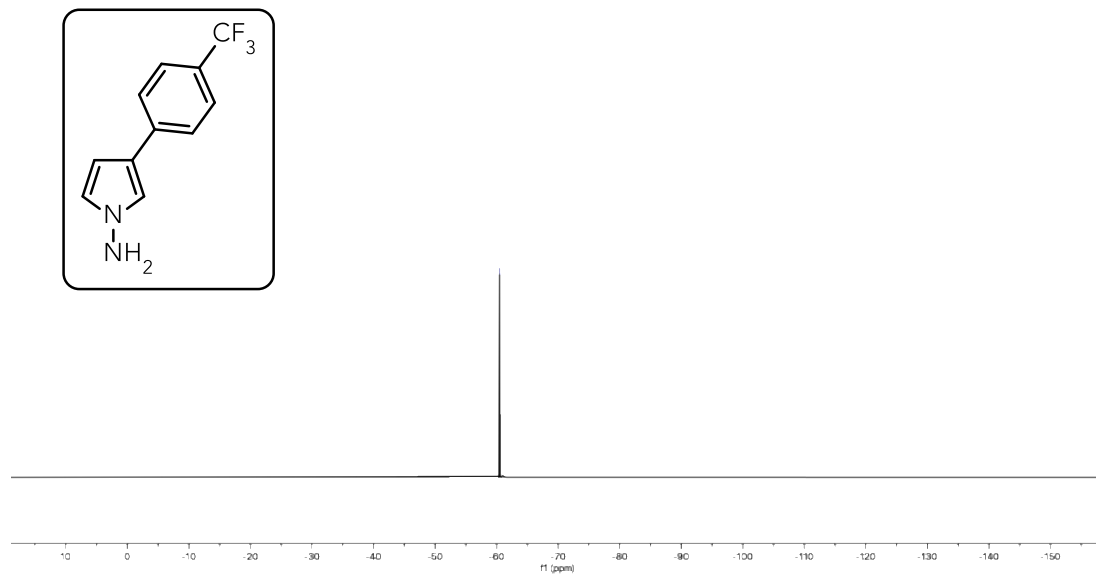

**Figure S32.** <sup>19</sup>F NMR spectrum of **9** in DMSO-d<sub>6</sub> at 25 °C.

DSM-81-CDCl3-ISOLATED-1H-IBS600

7.71  
7.71  
7.71  
7.67  
7.66  
7.41  
7.41  
7.40  
7.39  
7.26 CDCl<sub>3</sub>  
7.04  
7.04  
6.76  
6.75  
6.33  
6.33  
6.33  
-4.95

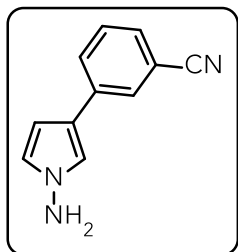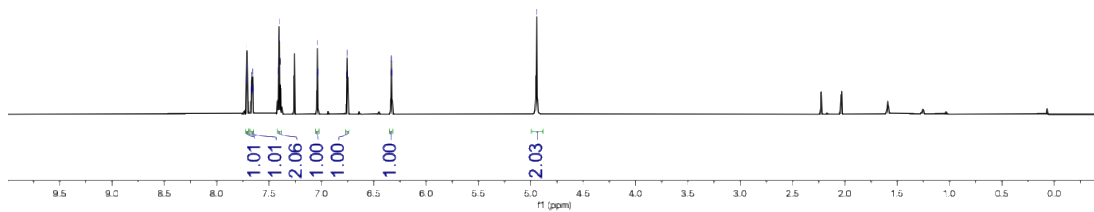

Figure S33. <sup>1</sup>H NMR spectrum of **10** in CDCl<sub>3</sub> at 25 °C.

DSM-81-CDCl3-ISOLATED-13C-IBS600

137.05  
129.50  
129.12  
128.83  
128.34  
123.83  
120.85  
119.73  
119.39  
112.75  
104.49  
77.46 CDCl<sub>3</sub>

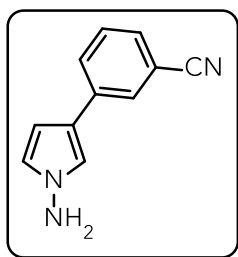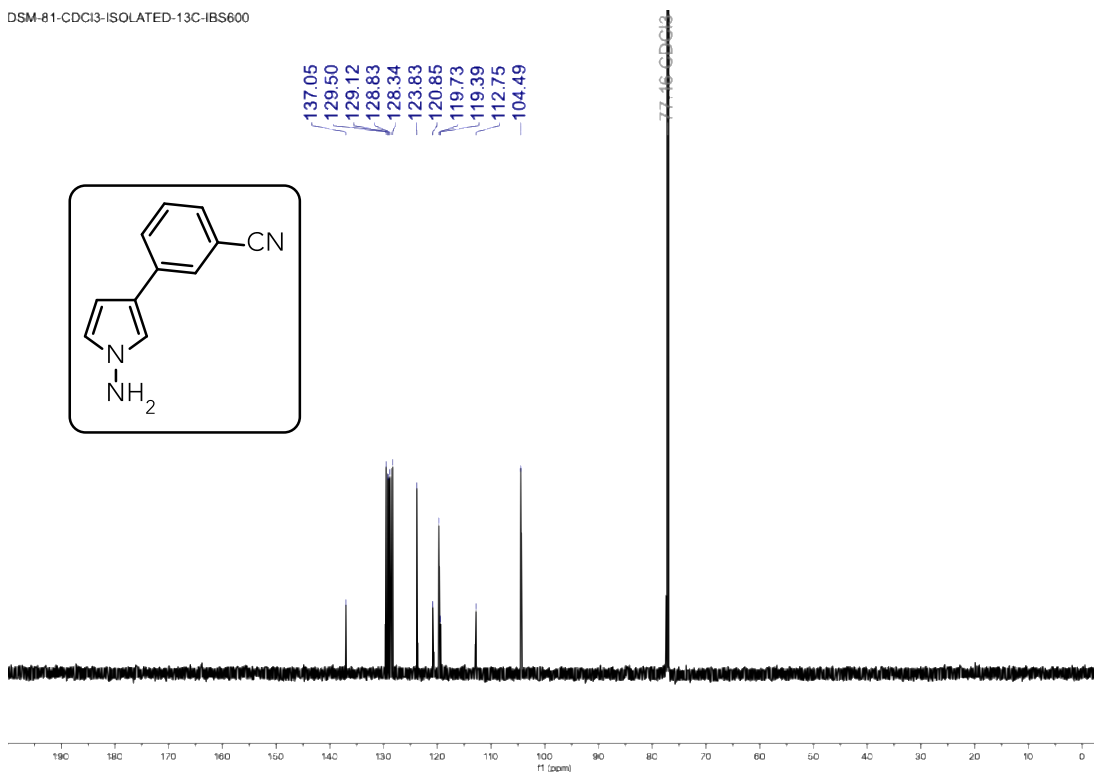

Figure S34. <sup>13</sup>C NMR spectrum of **10** in CDCl<sub>3</sub> at 25 °C.

DSM-83-CDCl3-ISOLATED-1H-IBS600

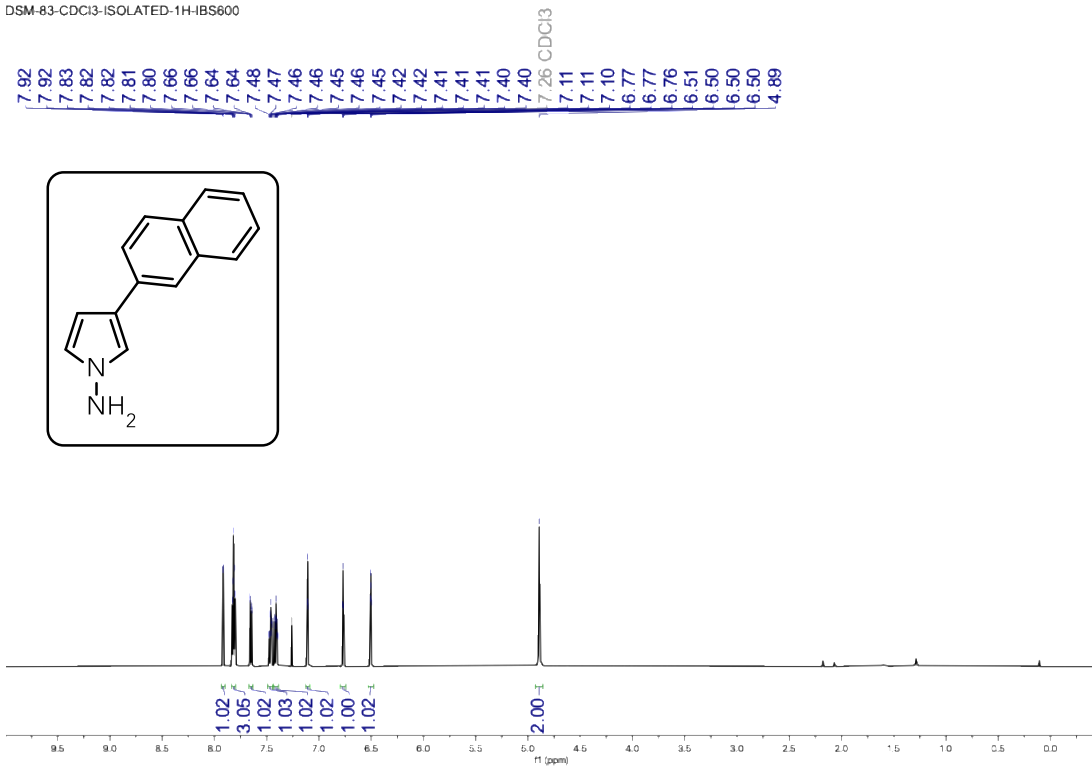

Figure S35. <sup>1</sup>H NMR spectrum of **11** in CDCl<sub>3</sub> at 25 °C.

DSM-83-CDCl3-ISOLATED-13C-IBS600

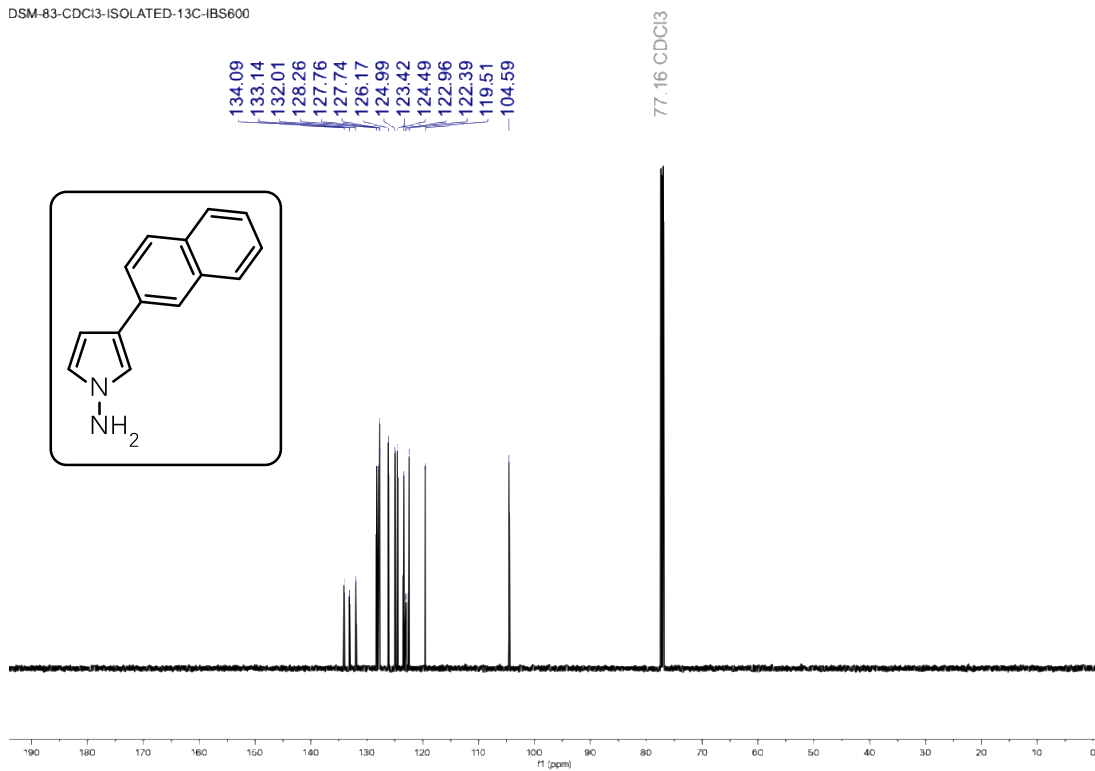

Figure S36. <sup>13</sup>C NMR spectrum of **11** in CDCl<sub>3</sub> at 25 °C.

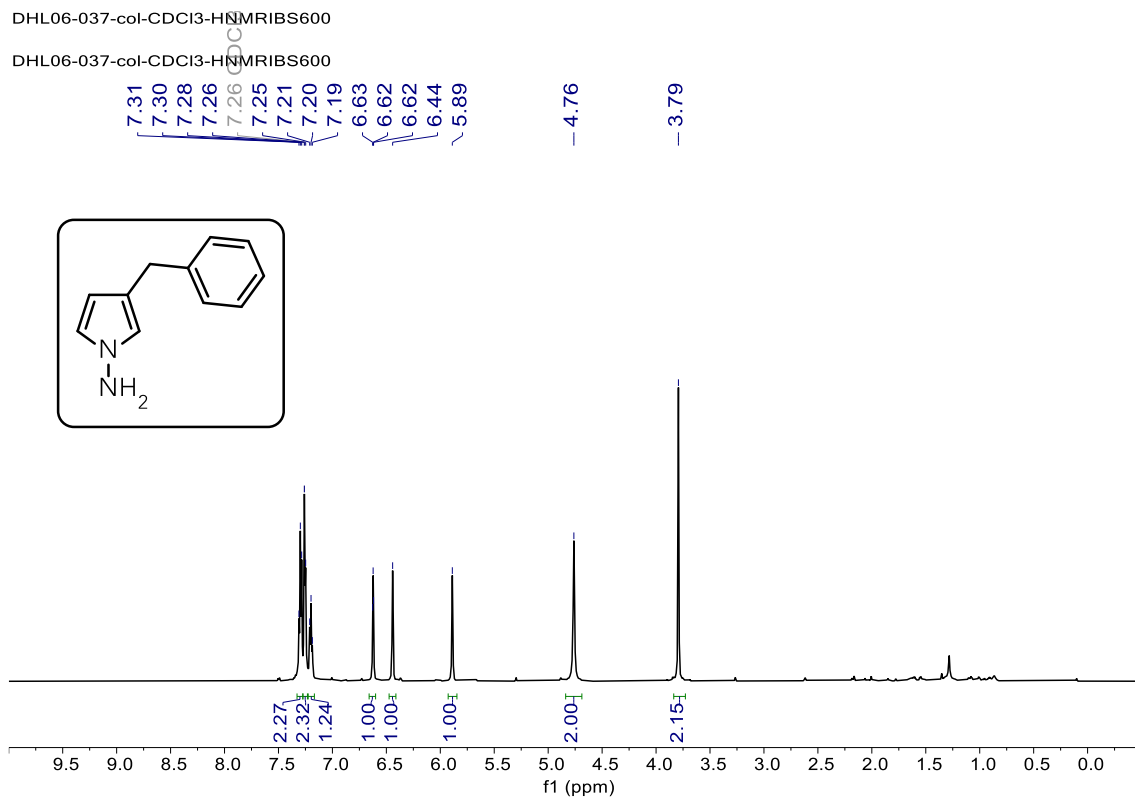

**Figure S37.**  $^1\text{H}$  NMR spectrum of **12** in  $\text{CDCl}_3$  at  $25\text{ }^\circ\text{C}$ .

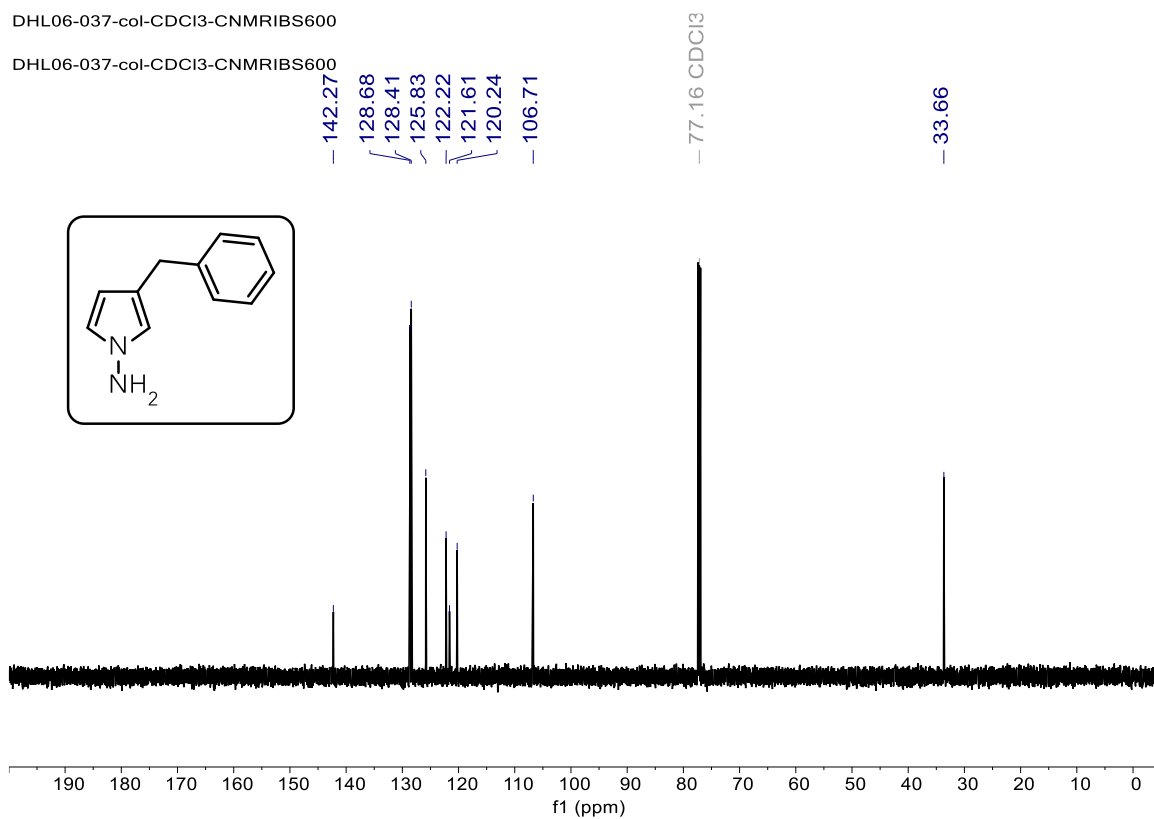

**Figure S38.**  $^{13}\text{C}$  NMR spectrum of **12** in  $\text{CDCl}_3$  at  $25\text{ }^\circ\text{C}$ .

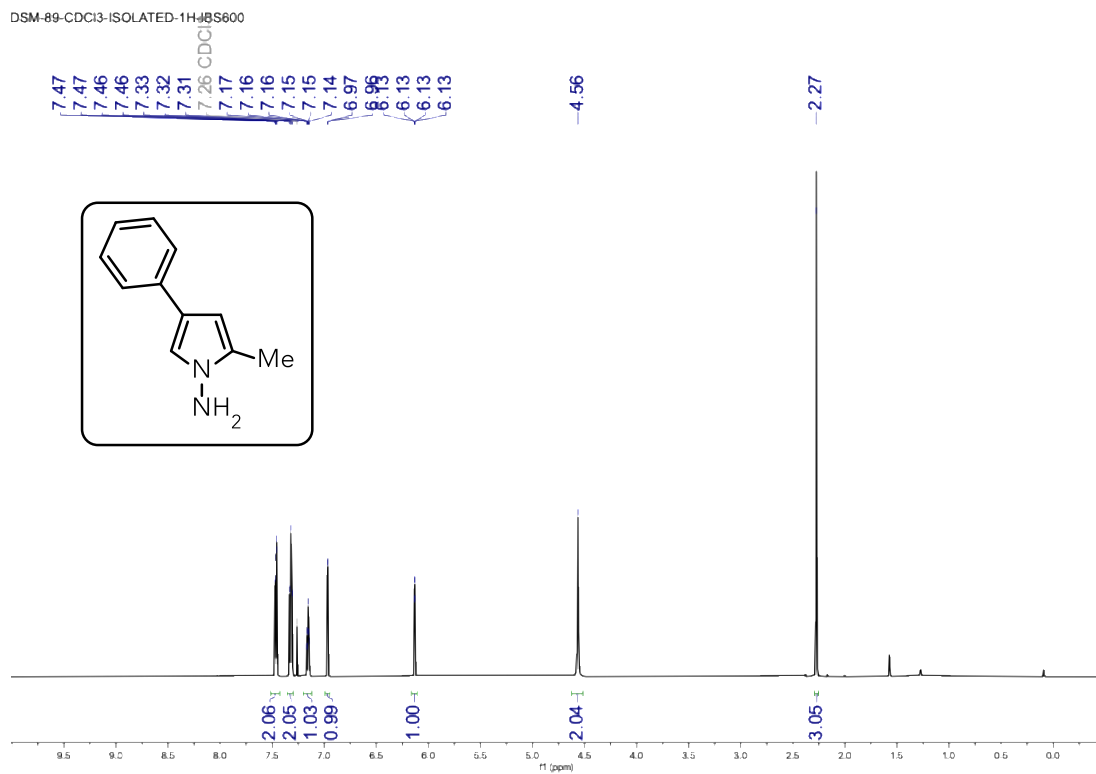

Figure S39. <sup>1</sup>H NMR spectrum of **13** in CDCl<sub>3</sub> at 25 °C.

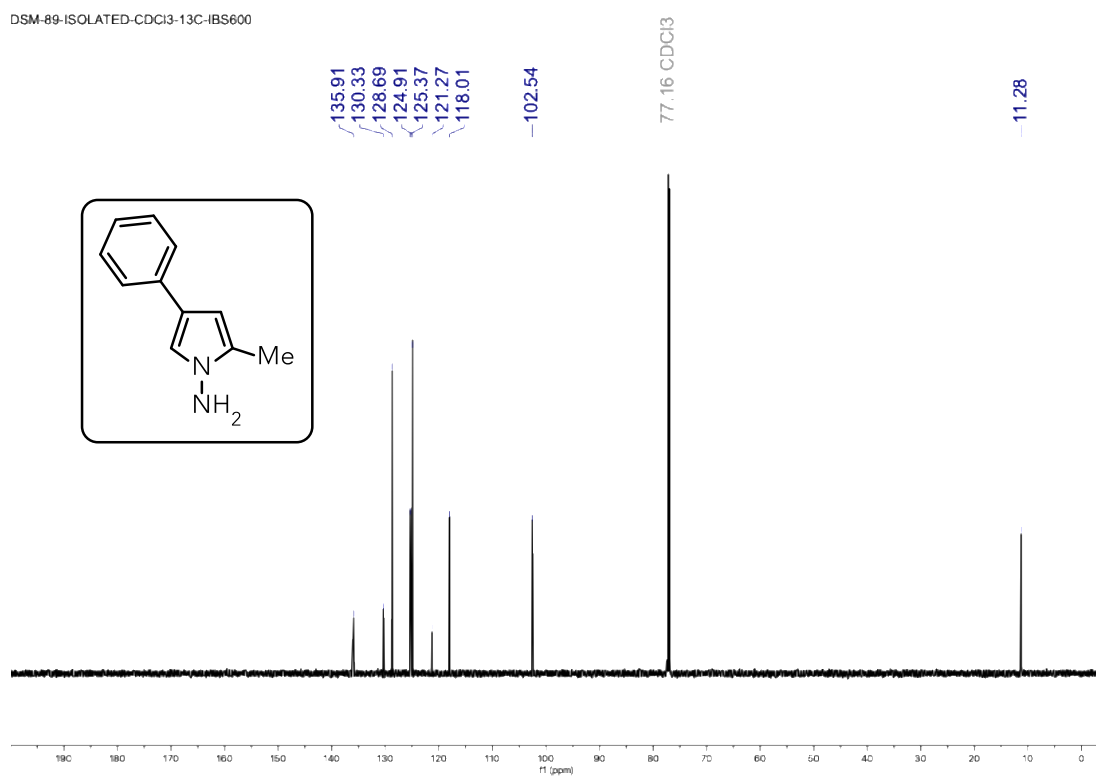

Figure S40. <sup>13</sup>C NMR spectrum of **13** in CDCl<sub>3</sub> at 25 °C.

DSM-242R-CDCl3-IBS600MHz-Isolated-1H

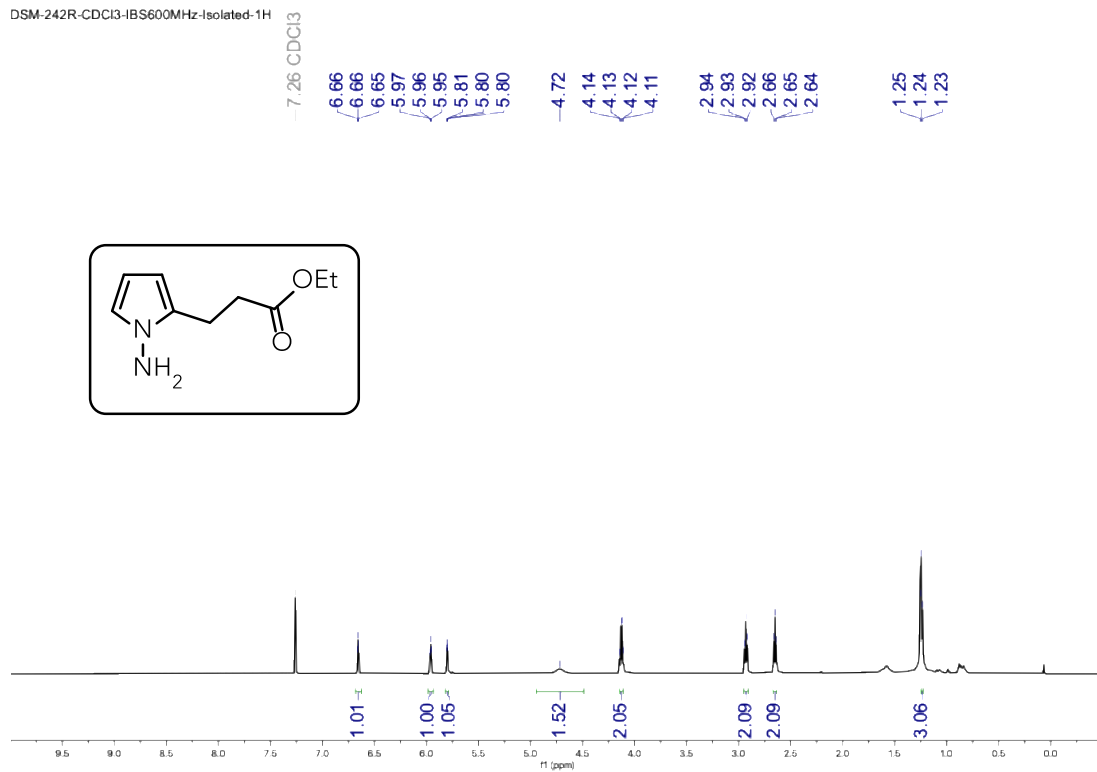

Figure S41. <sup>1</sup>H NMR spectrum of **14** in CDCl<sub>3</sub> at 25 °C.

DSM-242R-CDCl3-IBS600MHz-Isolated-13C

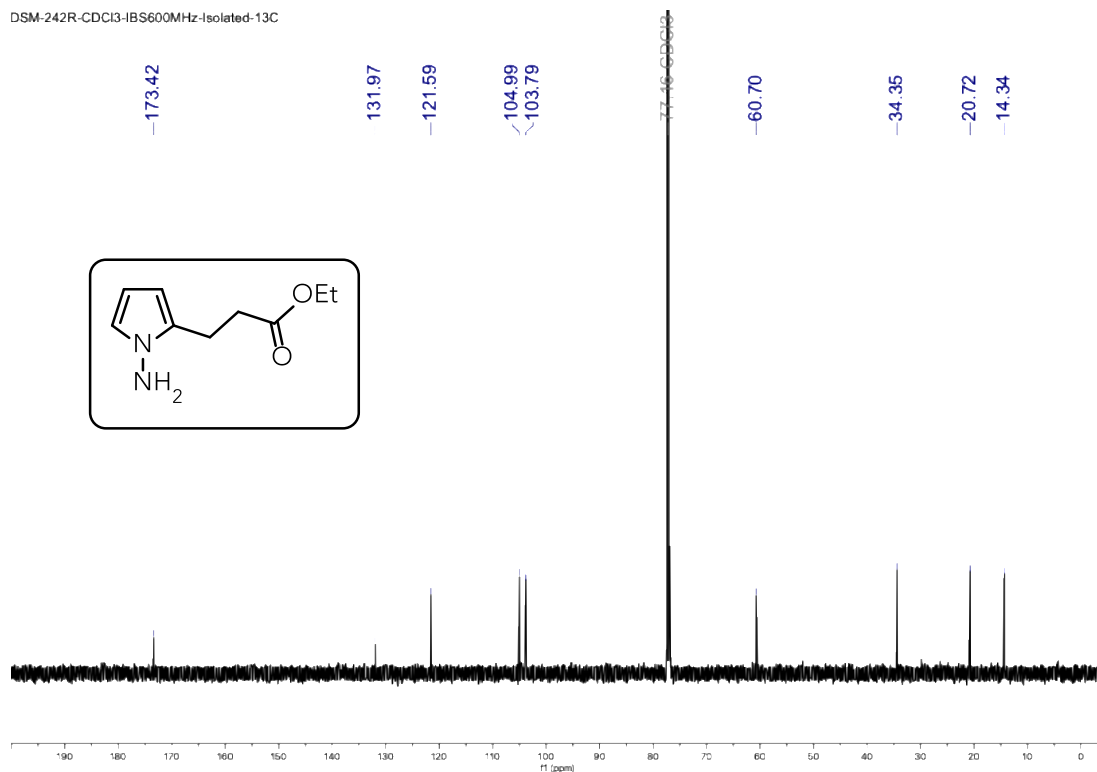

Figure S42. <sup>13</sup>C NMR spectrum of **14** in CDCl<sub>3</sub> at 25 °C.

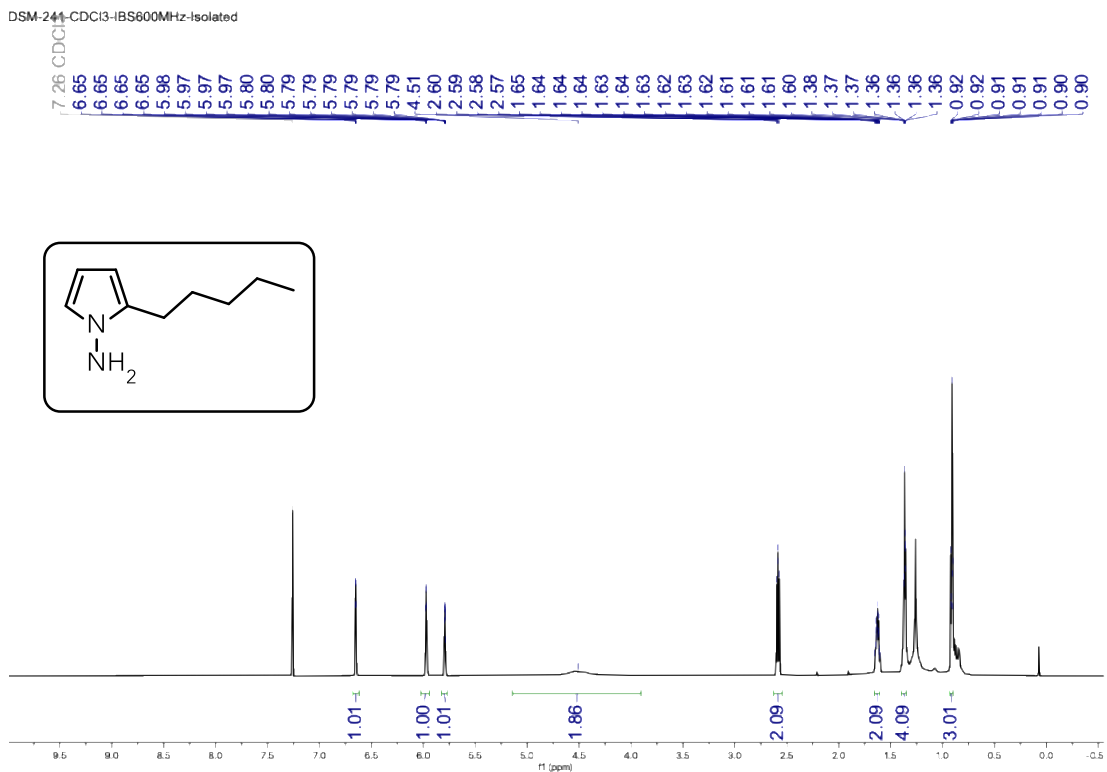

**Figure S43.** <sup>1</sup>H NMR spectrum of **15** in CDCl<sub>3</sub> at 25 °C.

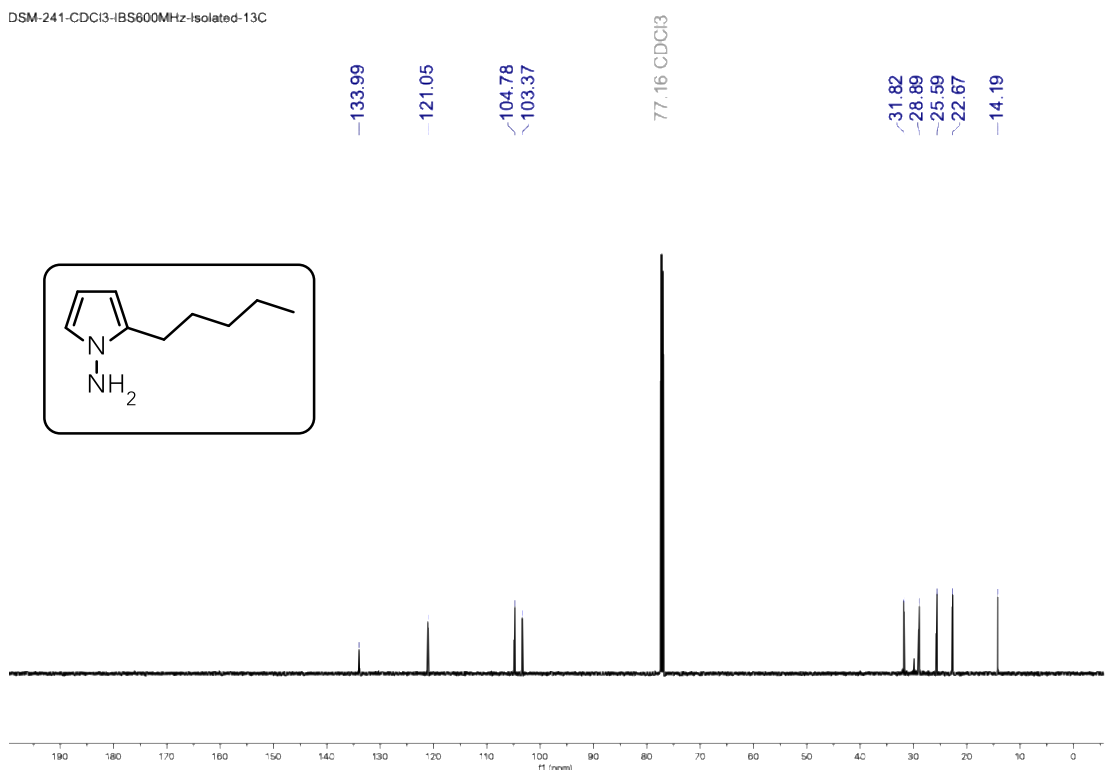

**Figure S44.** <sup>13</sup>C NMR spectrum of **15** in CDCl<sub>3</sub> at 25 °C.

DSM-148-Isolated-cdcl3-1H-IBS600

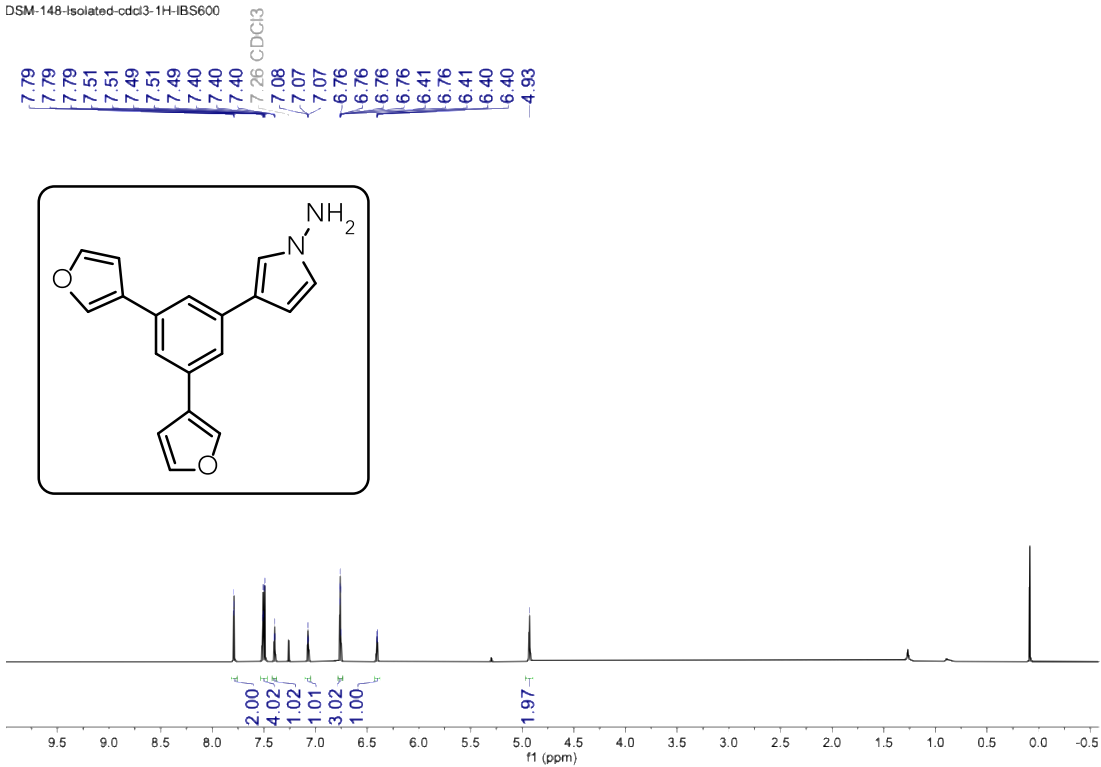

Figure S45. <sup>1</sup>H NMR spectrum of **16** in CDCl<sub>3</sub> at 25 °C.

DSM-148-Isolated-cdcl3-13C-IBS600

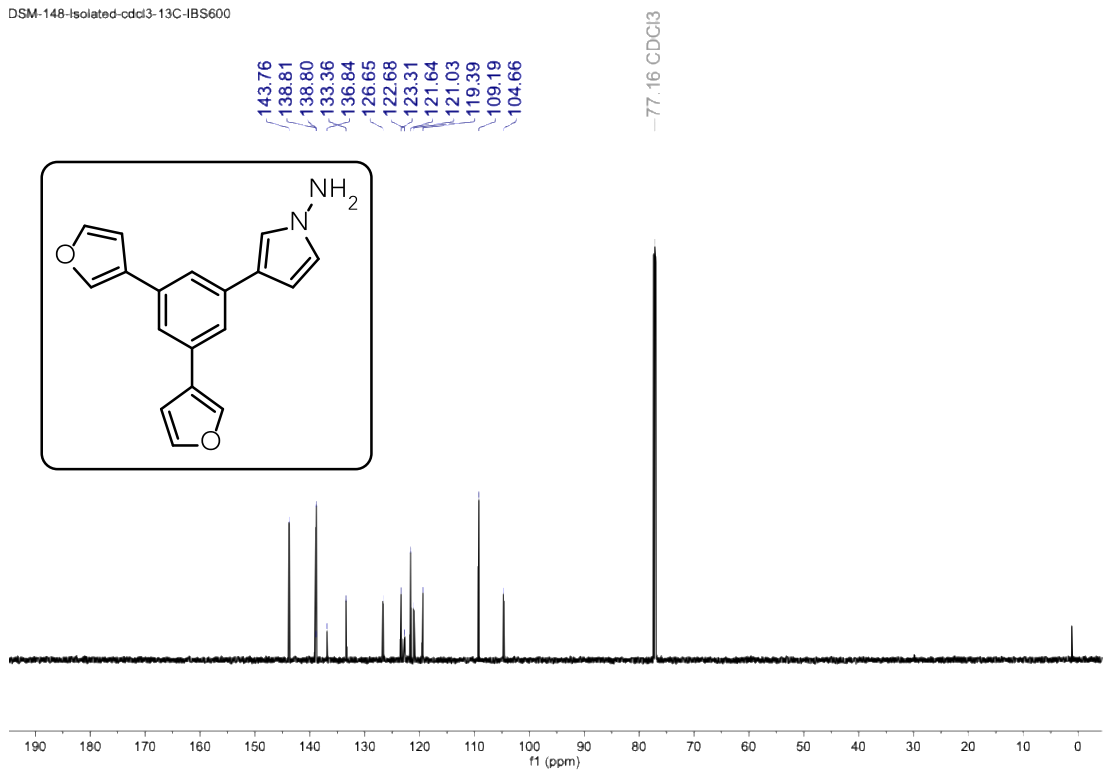

Figure S46. <sup>13</sup>C NMR spectrum of **16** in CDCl<sub>3</sub> at 25 °C.

DSM-164-Isolated-cdcl3-1H-IBS600

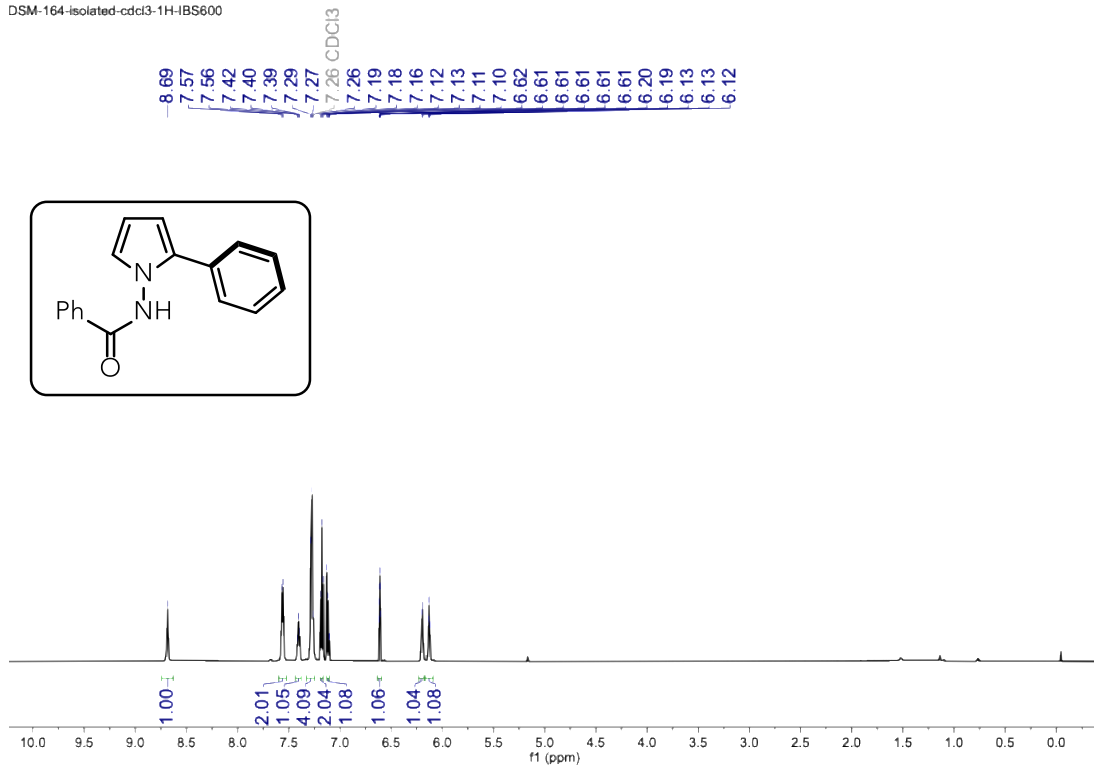

Figure S47. <sup>1</sup>H NMR spectrum of **17** in CDCl<sub>3</sub> at 25 °C.

DSM-164-Isolated-13C-IBS600

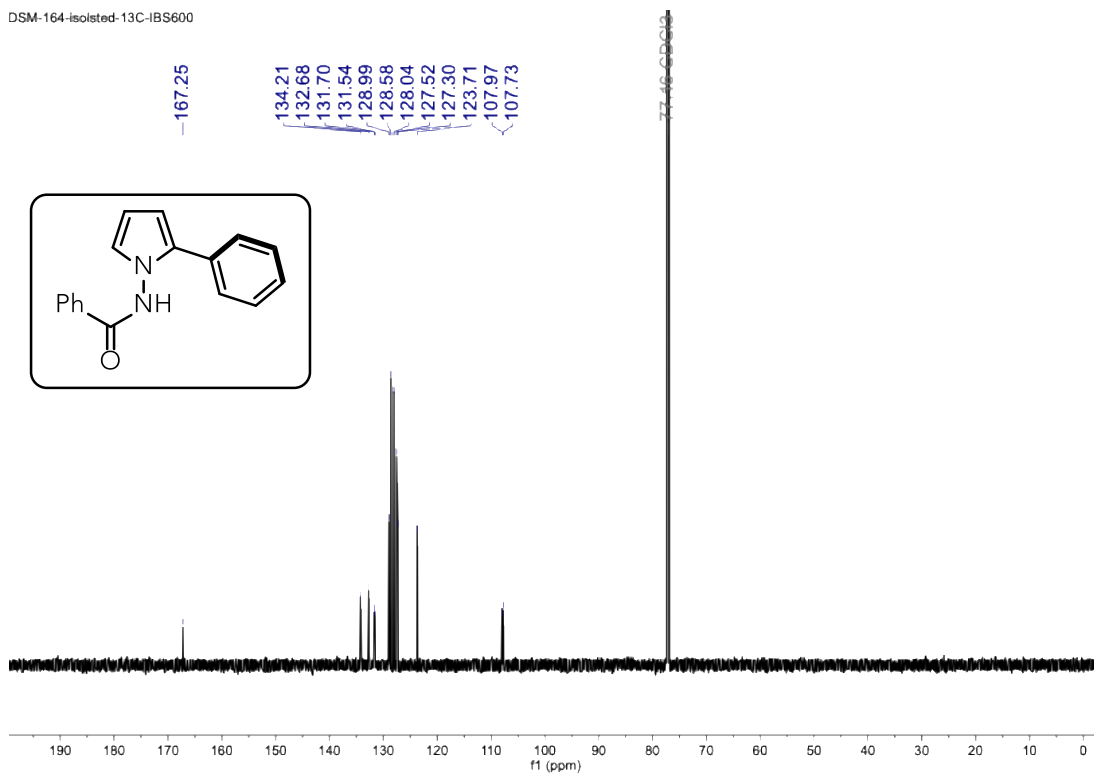

Figure S48. <sup>13</sup>C NMR spectrum of **17** in CDCl<sub>3</sub> at 25 °C.

DSM-41-DMSO-d6-ISOLATED-1H\_AVNEO400

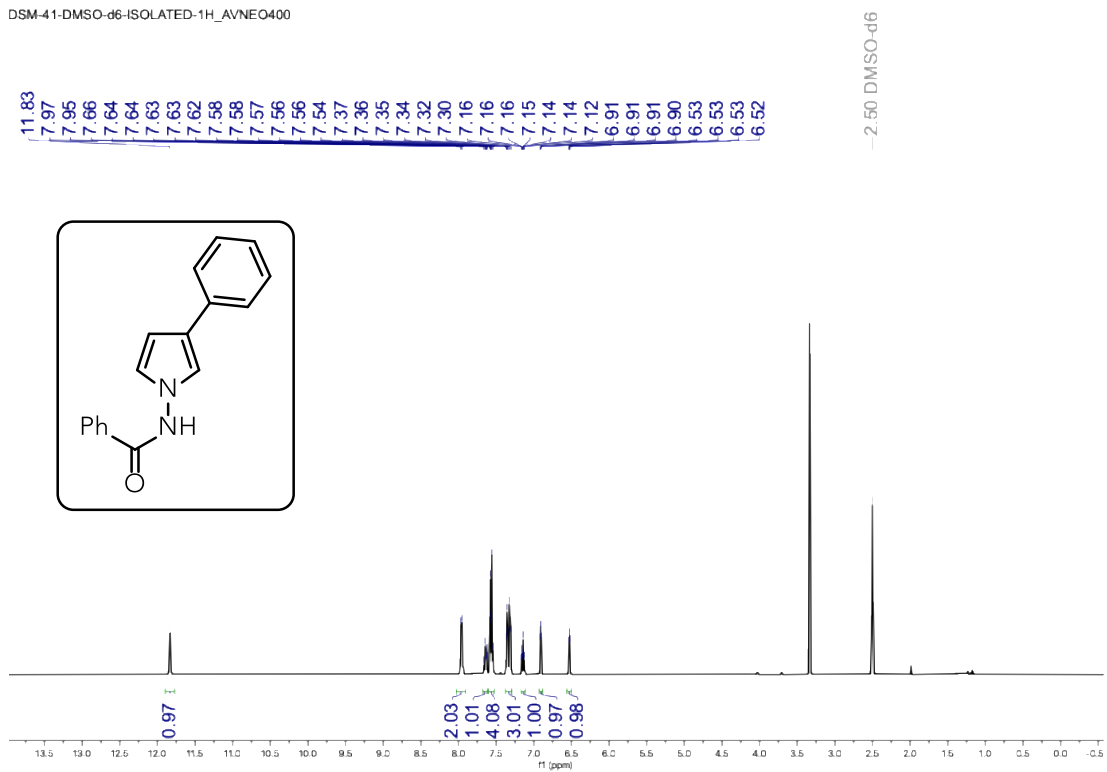

Figure S49. <sup>1</sup>H NMR spectrum of **18** in DMSO-d<sub>6</sub> at 25 °C.

DSM-41-DMSO-d6-ISOLATED-13C\_AVNEO400

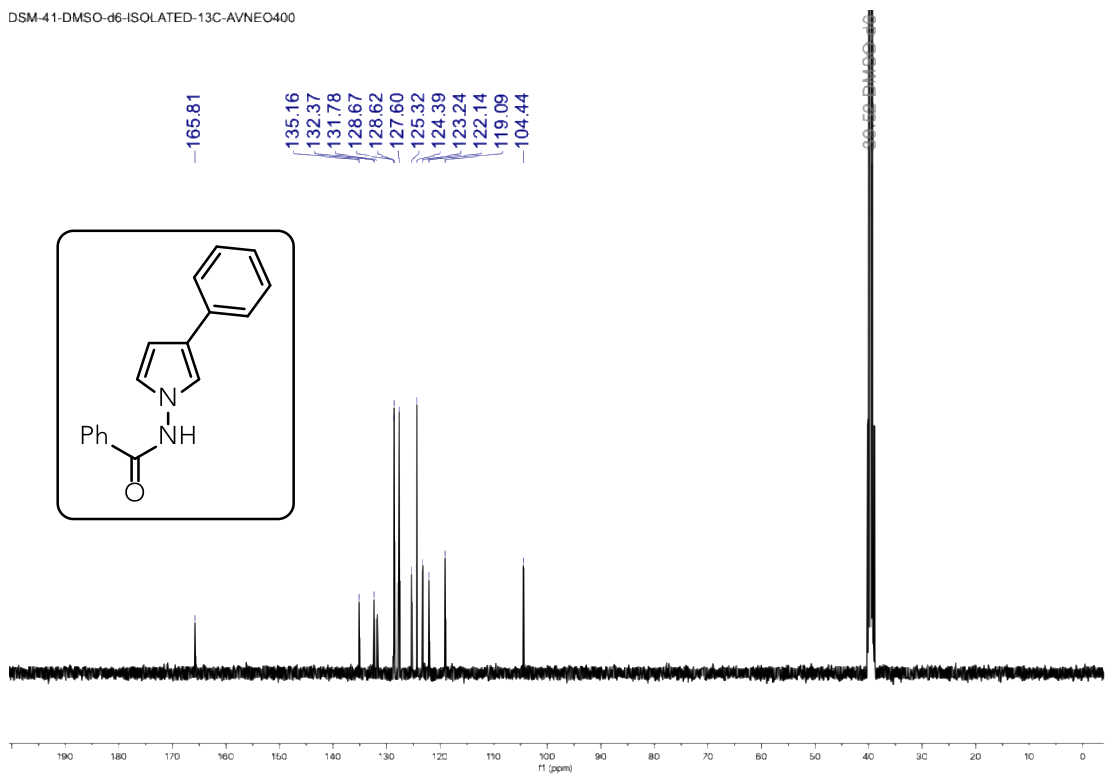

Figure S50. <sup>13</sup>C NMR spectrum of **18** in DMSO-d<sub>6</sub> at 25 °C.

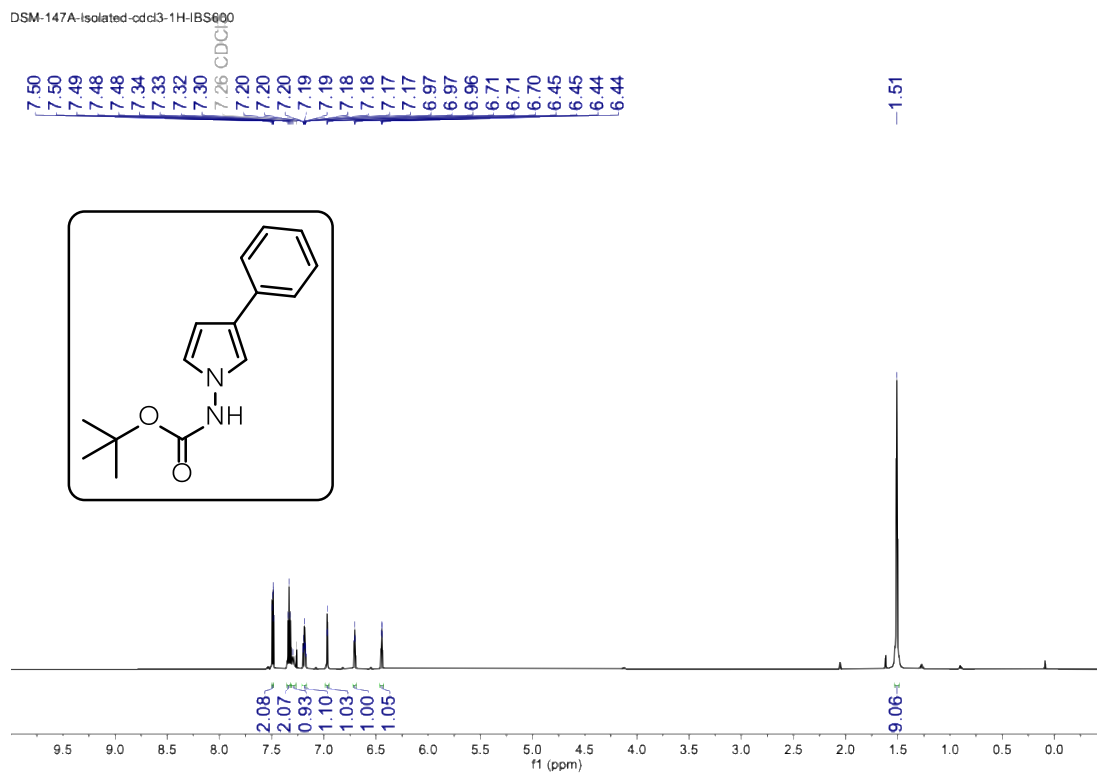

**Figure S51.** <sup>1</sup>H NMR spectrum of **19** in CDCl<sub>3</sub> at 25 °C.

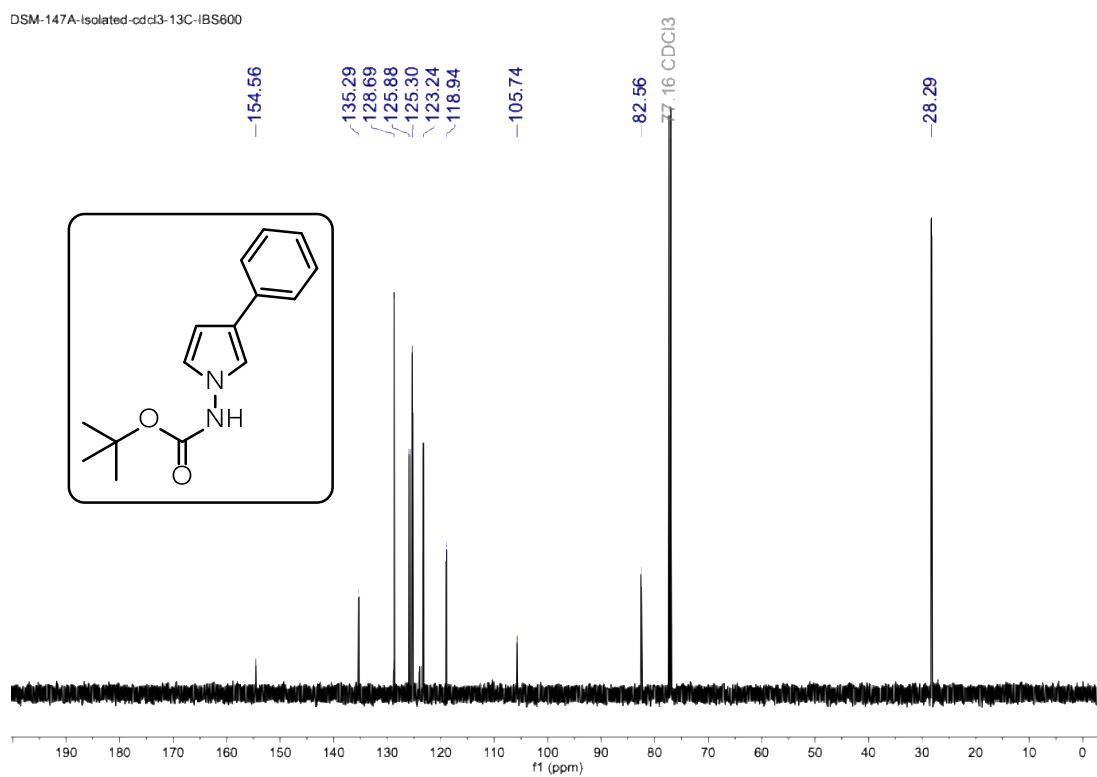

**Figure S52.** <sup>13</sup>C NMR spectrum of **19** in CDCl<sub>3</sub> at 25 °C.

DHL06-062-col-CDCl3-HNMRAV500\_426.fid  
DHL06-062-col-CDCl3-HNMRAV500

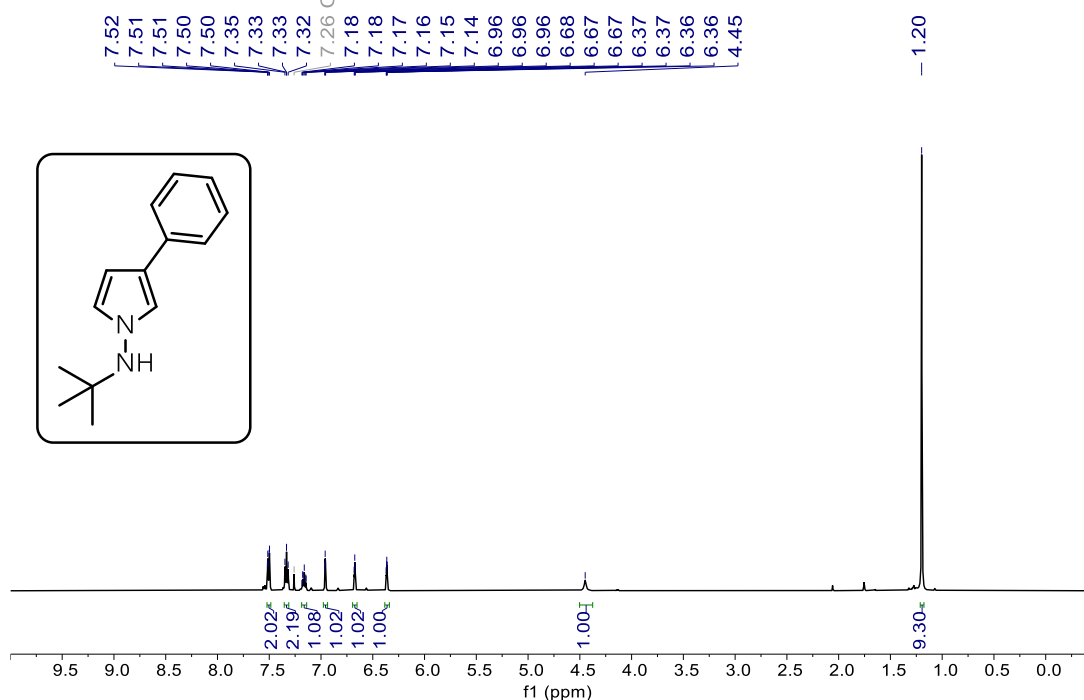

Figure S53.  $^1\text{H}$  NMR spectrum of **20** in  $\text{CDCl}_3$  at 25 °C.

DHL06-062-col-CDCl3-13CNMRAV500\_1\_428.fid  
DHL06-062-col-CDCl3-13CNMRAV500\_1

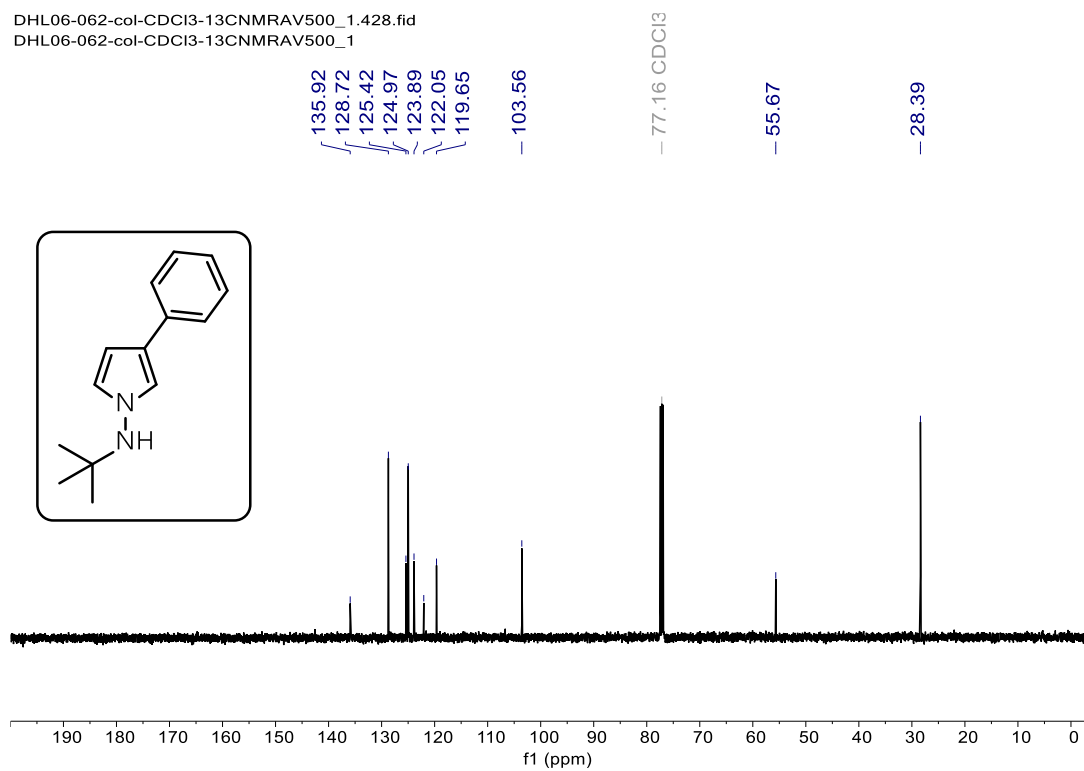

Figure S54.  $^{13}\text{C}$  NMR spectrum of **20** in  $\text{CDCl}_3$  at 25 °C.

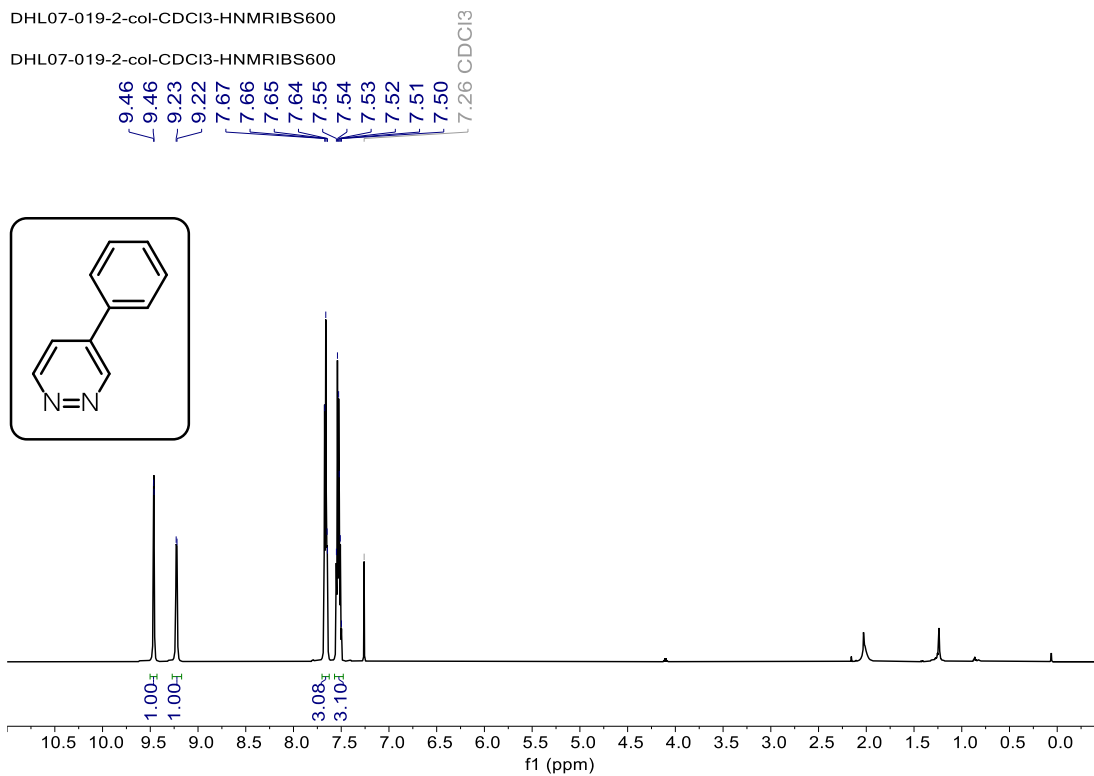

**Figure S55.**  $^1\text{H}$  NMR spectrum of **3** in  $\text{CDCl}_3$  at 25 °C.

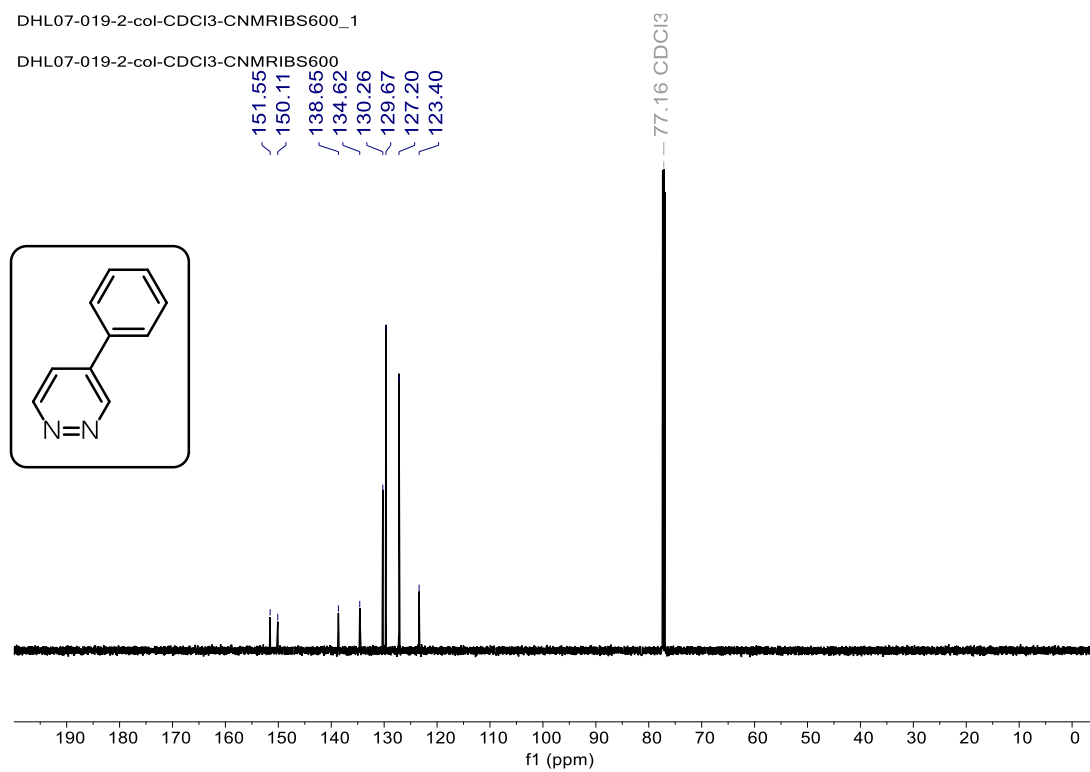

**Figure S56.**  $^{13}\text{C}$  NMR spectrum of **3** in  $\text{CDCl}_3$  at 25 °C.

DSM-08-CDCl3-1BS600MHz-Isolated

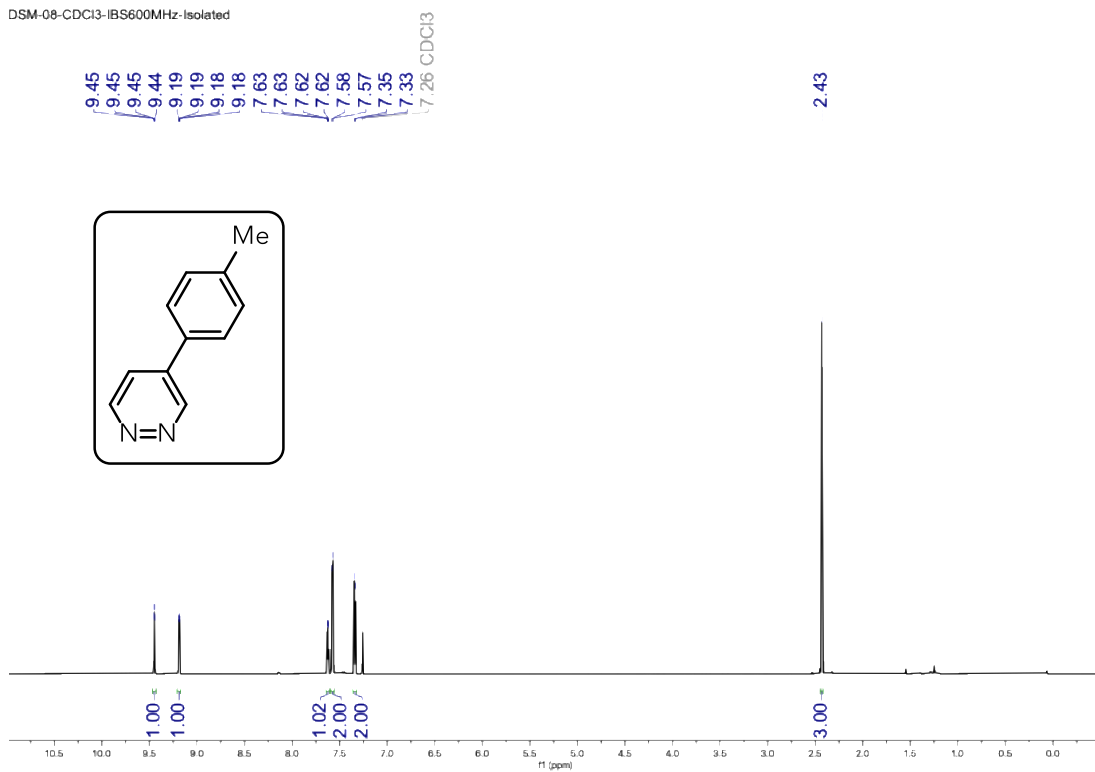

Figure S57. <sup>1</sup>H NMR spectrum of **21** in CDCl<sub>3</sub> at 25 °C.

DSM-08\_CDCl3-13C-600MHz-Isolated

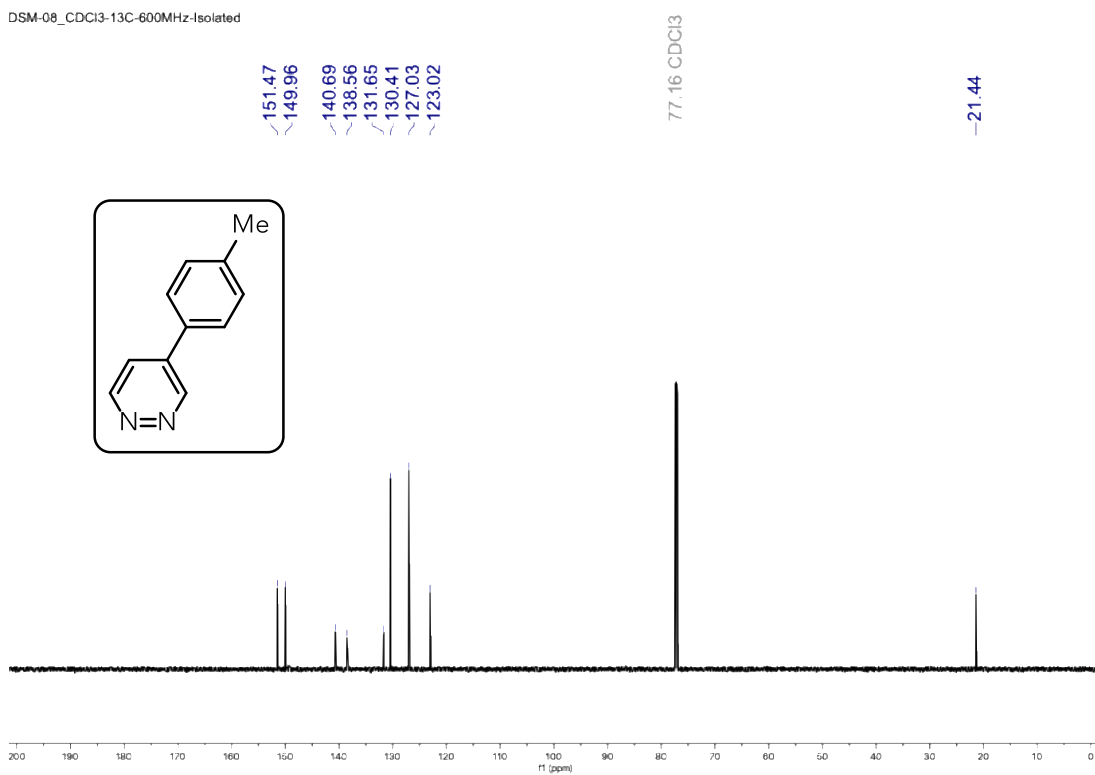

Figure S58. <sup>13</sup>C NMR spectrum of **21** in CDCl<sub>3</sub> at 25 °C.

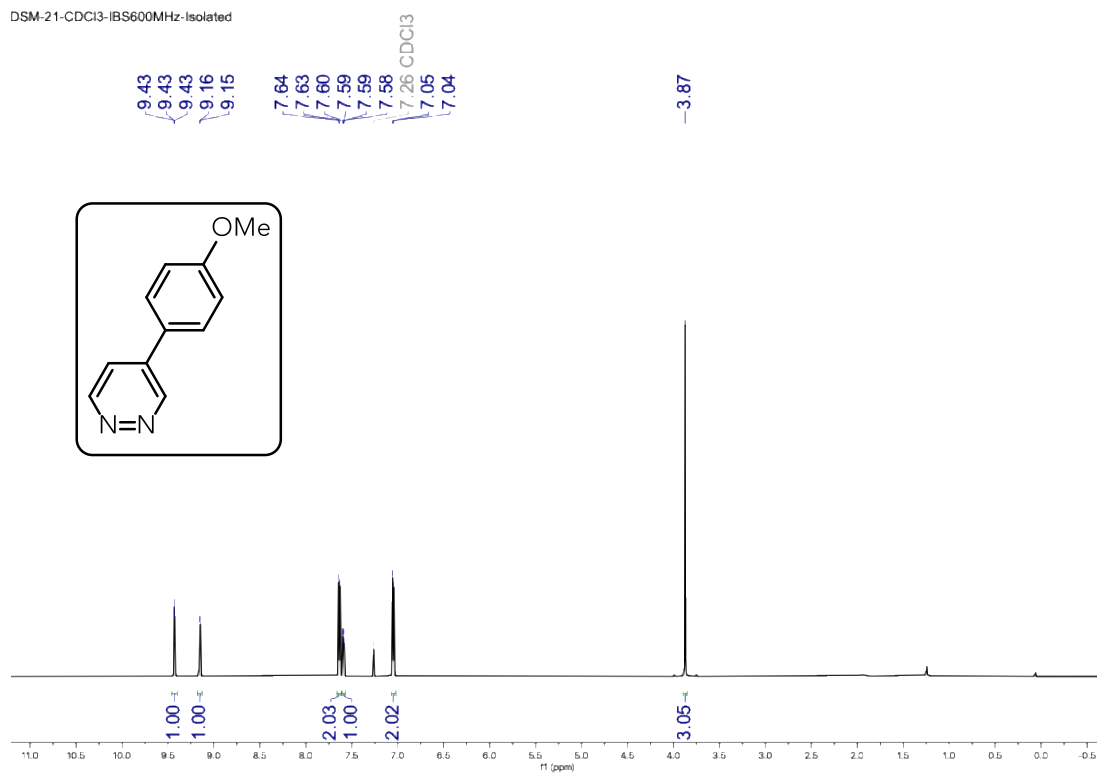

**Figure S59.** <sup>1</sup>H NMR spectrum of **22** in CDCl<sub>3</sub> at 25 °C.

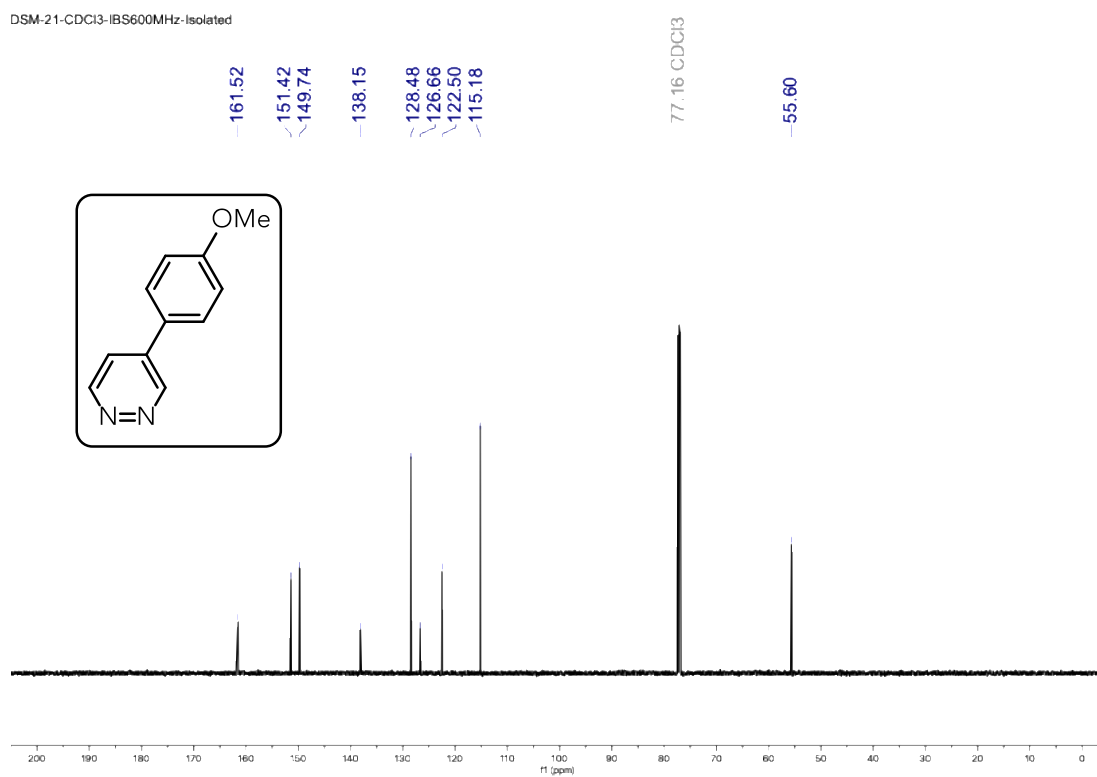

**Figure S60.** <sup>13</sup>C NMR spectrum of **22** in CDCl<sub>3</sub> at 25 °C.

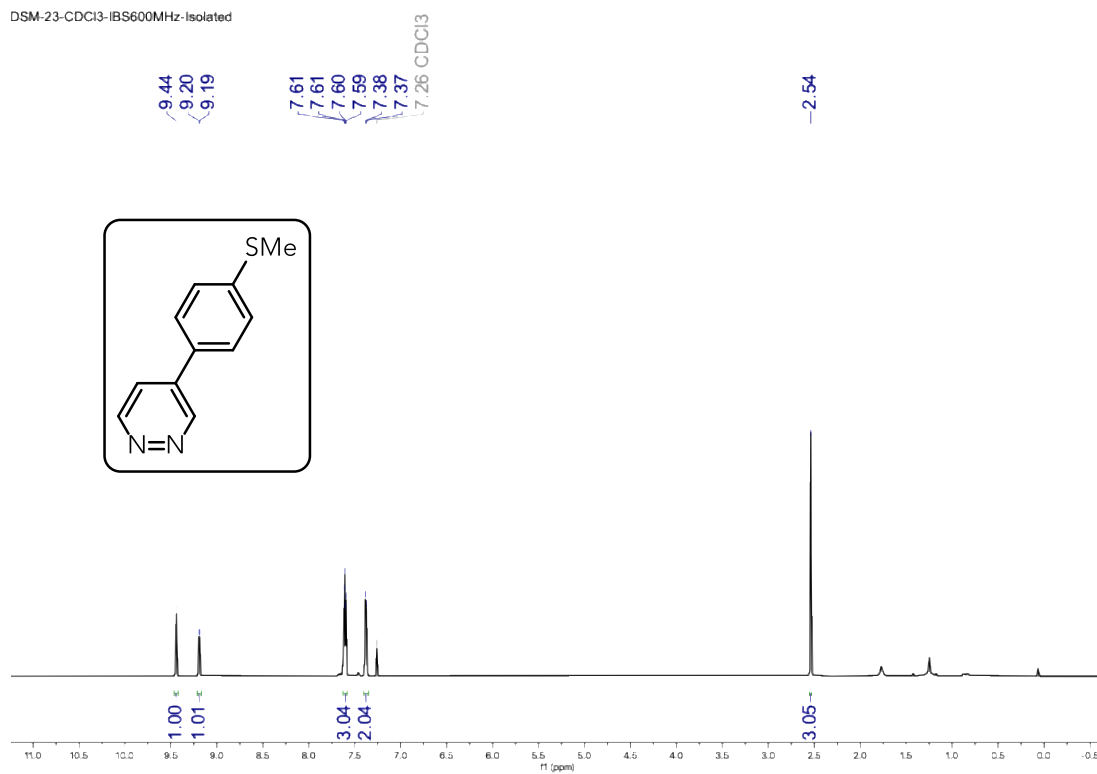

**Figure S61.**  $^1\text{H}$  NMR spectrum of **23** in  $\text{CDCl}_3$  at 25 °C.

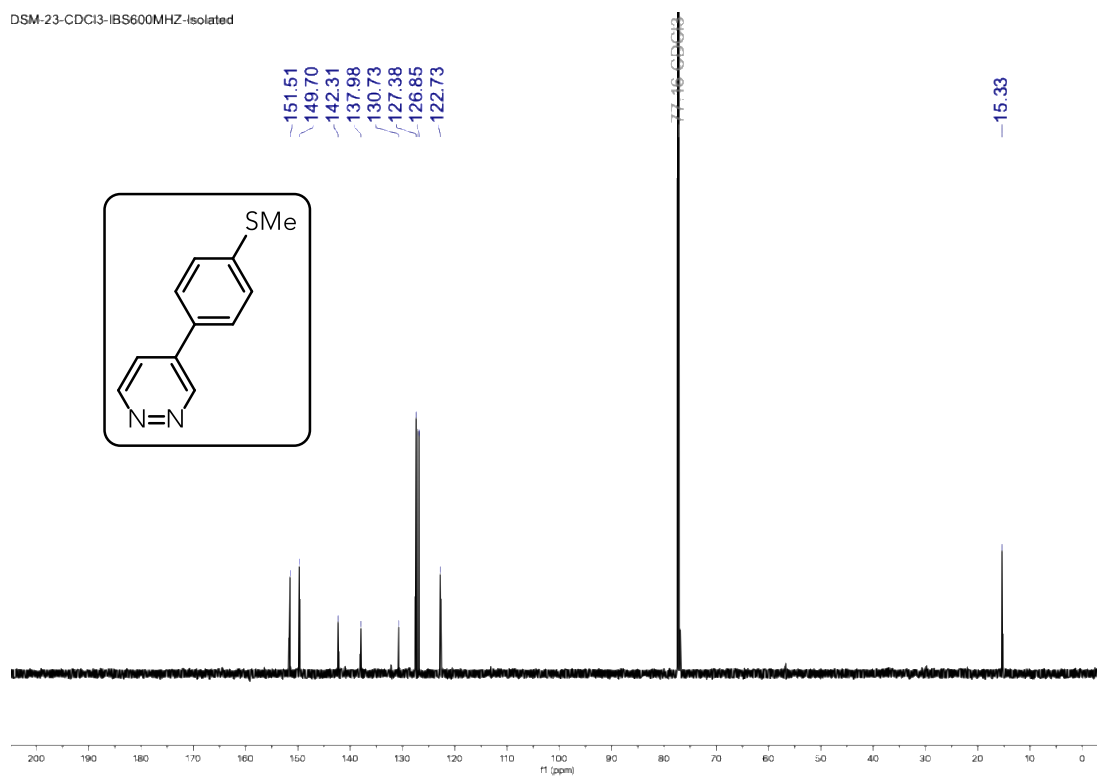

**Figure S62.**  $^{13}\text{C}$  NMR spectrum of **23** in  $\text{CDCl}_3$  at 25 °C.

DSM-26R-CDCl3-1H-IBS600MHz-Isolated

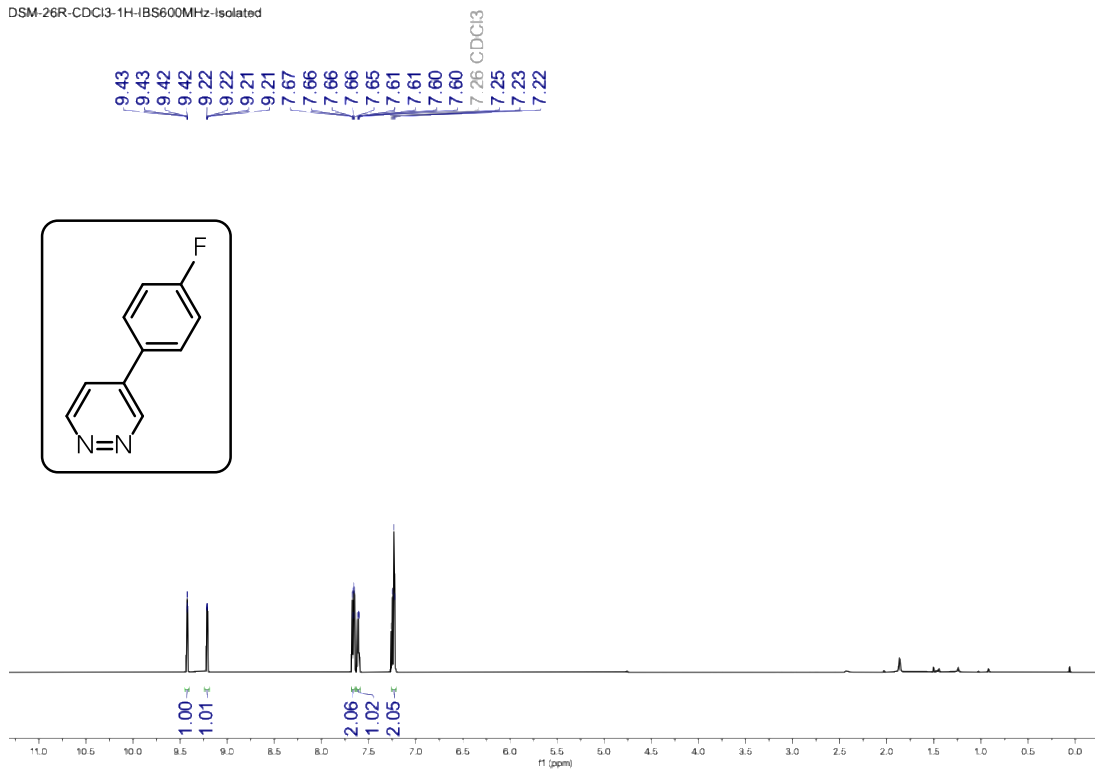

Figure S63.  $^1\text{H}$  NMR spectrum of **24** in  $\text{CDCl}_3$  at  $25\text{ }^\circ\text{C}$ .

DSM-26R-CDCl3-13C-IBS600MHz-Isolated

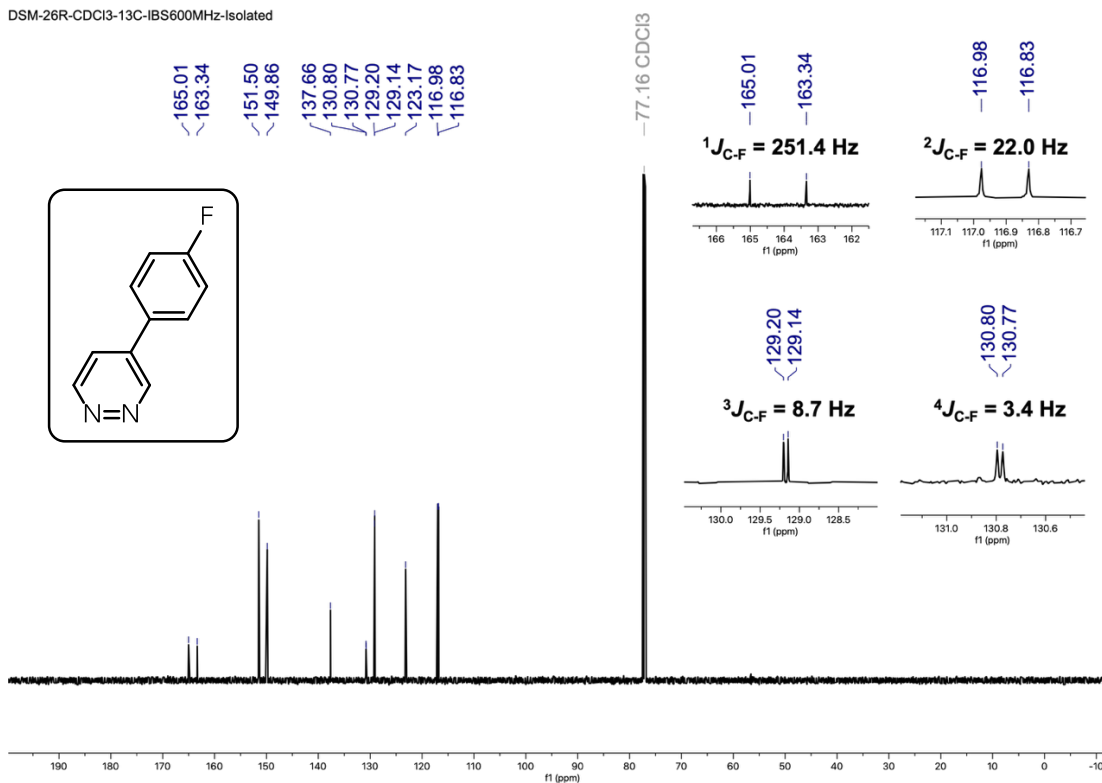

Figure S64.  $^{13}\text{C}$  NMR spectrum of **24** in  $\text{CDCl}_3$  at  $25\text{ }^\circ\text{C}$ .

---110.28

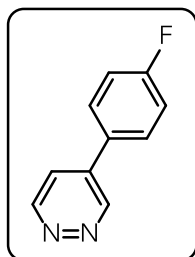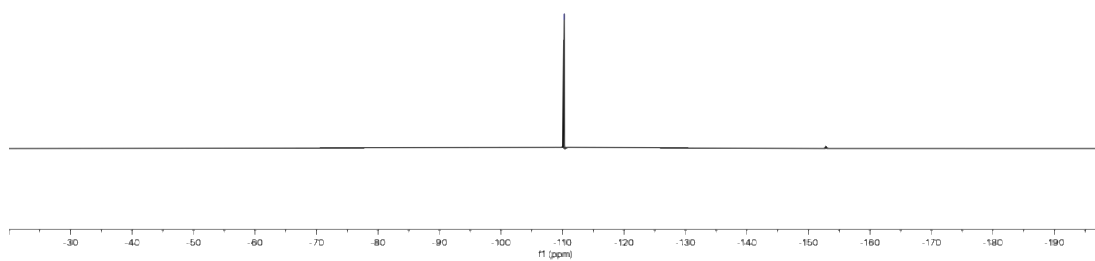

**Figure S65.**  $^{19}\text{F}$  NMR spectrum of **24** in  $\text{CDCl}_3$  at 25 °C.

DSM-77-CDCl3-IBS600MHz-Isolated

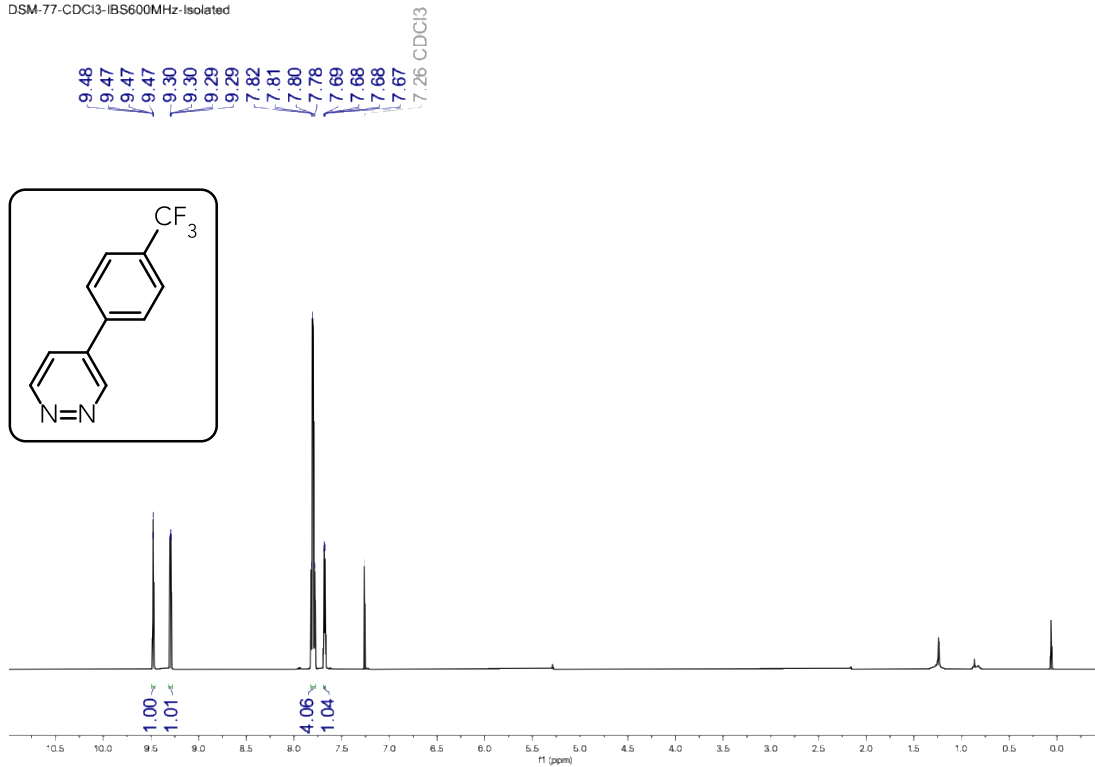

Figure S66. <sup>1</sup>H NMR spectrum of **25** in CDCl<sub>3</sub> at 25 °C.

DSM-77-CDCl3-IBS600MHz-Isolated

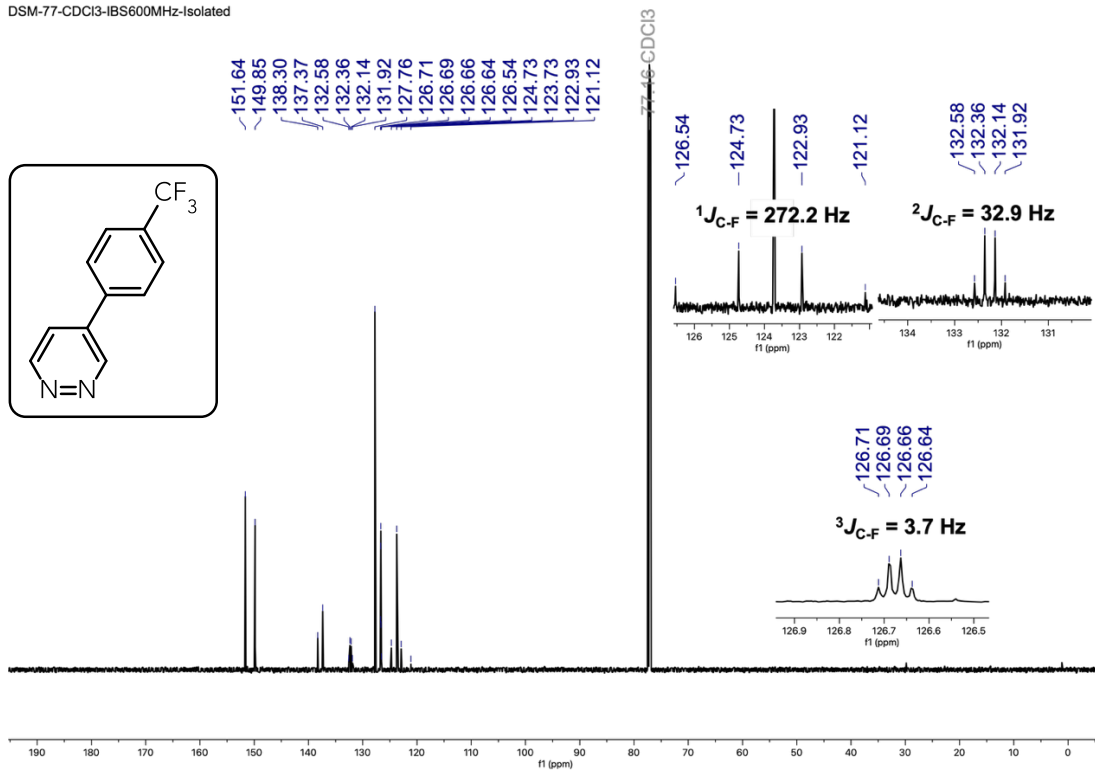

Figure S67. <sup>13</sup>C NMR spectrum of **25** in CDCl<sub>3</sub> at 25 °C.

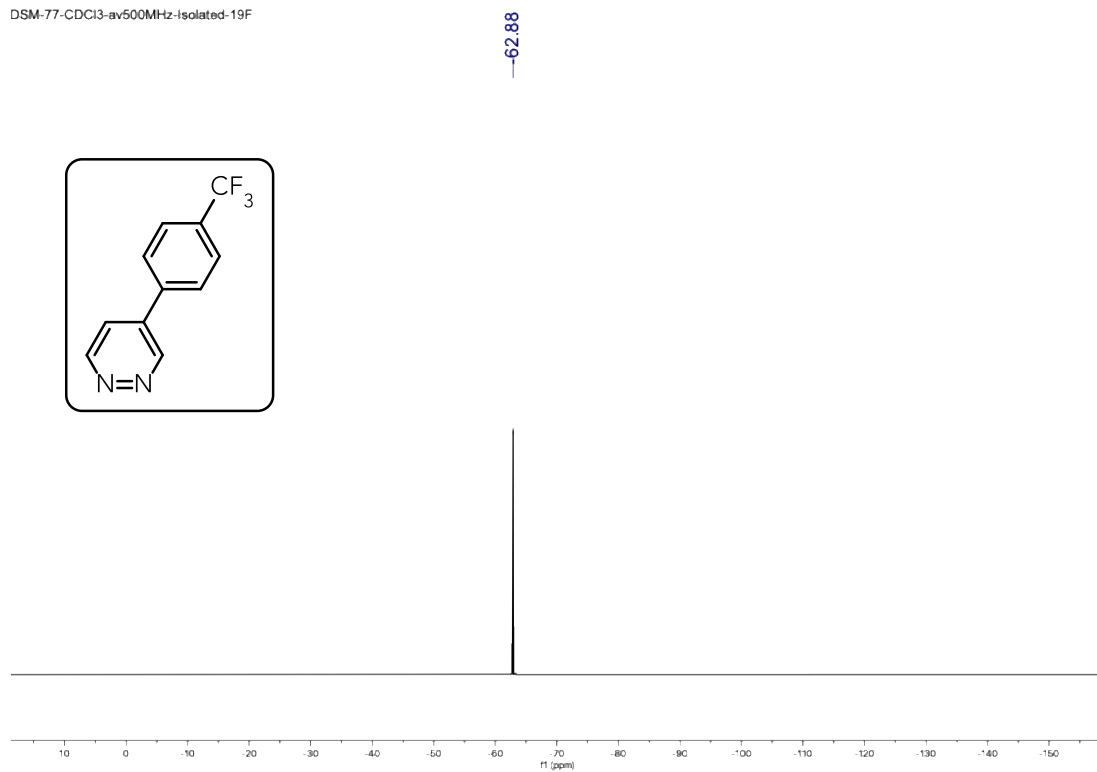

**Figure S68.**  $^{19}\text{F}$  NMR spectrum of **25** in  $\text{CDCl}_3$  at 25 °C.

DSM-34-CDCl3-1H-AVHD400-Isolated

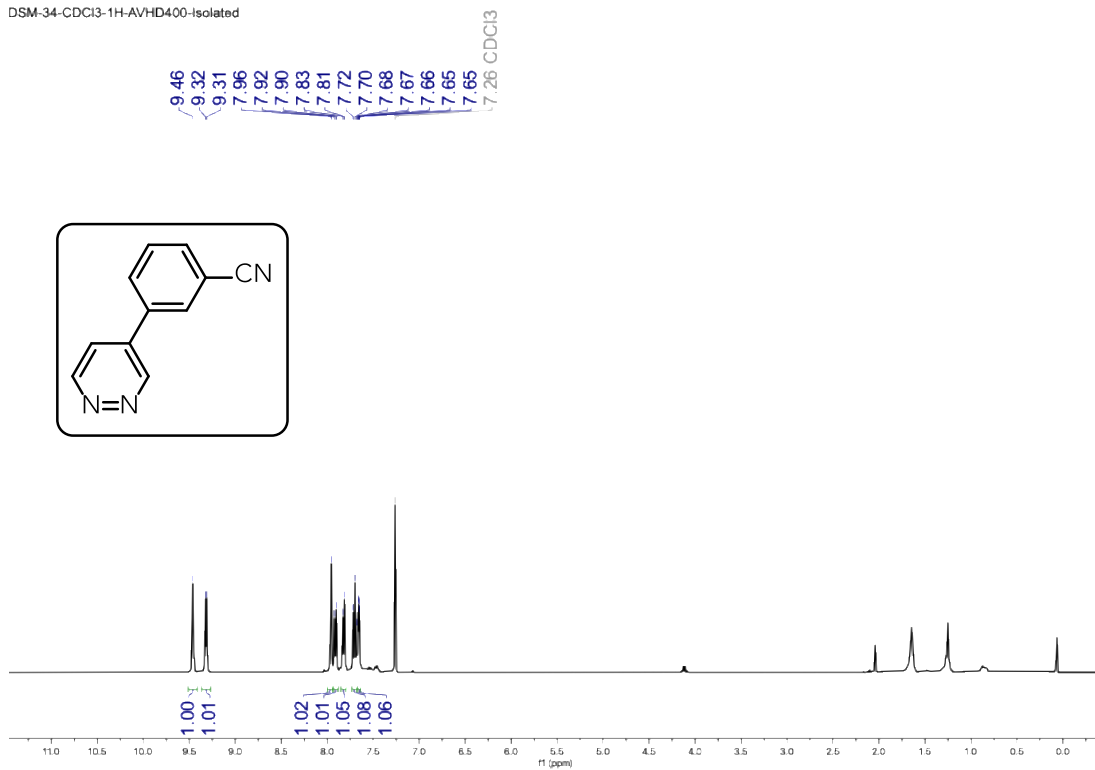

Figure S69. <sup>1</sup>H NMR spectrum of **26** in CDCl<sub>3</sub> at 25 °C.

DSM-34-CDCl3-13C-600MHz-Isolated-13C

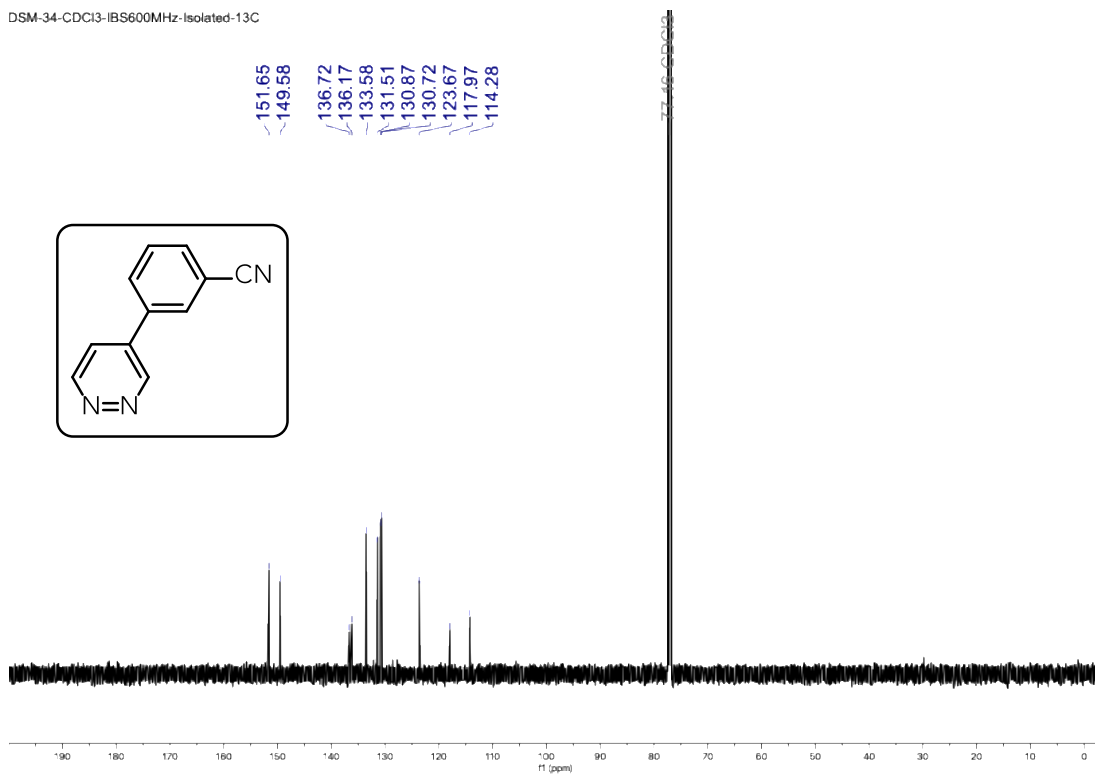

Figure S70. <sup>13</sup>C NMR spectrum of **26** in CDCl<sub>3</sub> at 25 °C.

DSM-28R-CDCl3-Isolated-1H-IBS600MHz

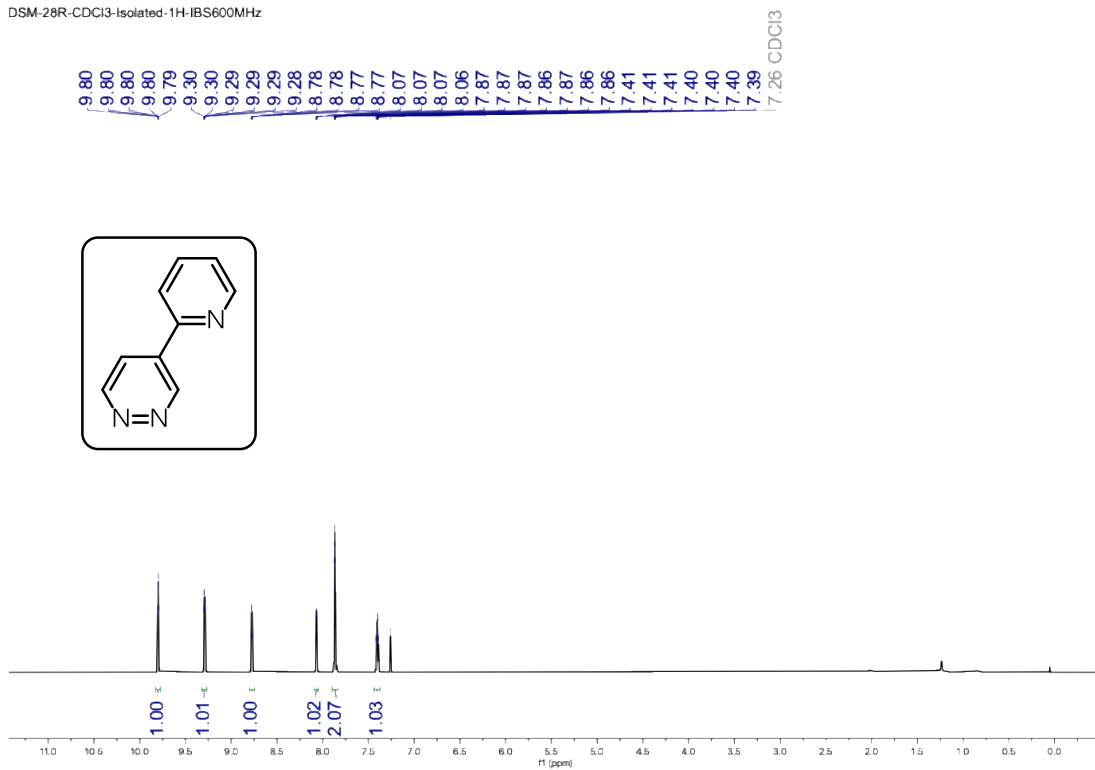

Figure S71. <sup>1</sup>H NMR spectrum of **27** in CDCl<sub>3</sub> at 25 °C.

DSM-28R-CDCl3-Isolated-13C-IBS600MHz

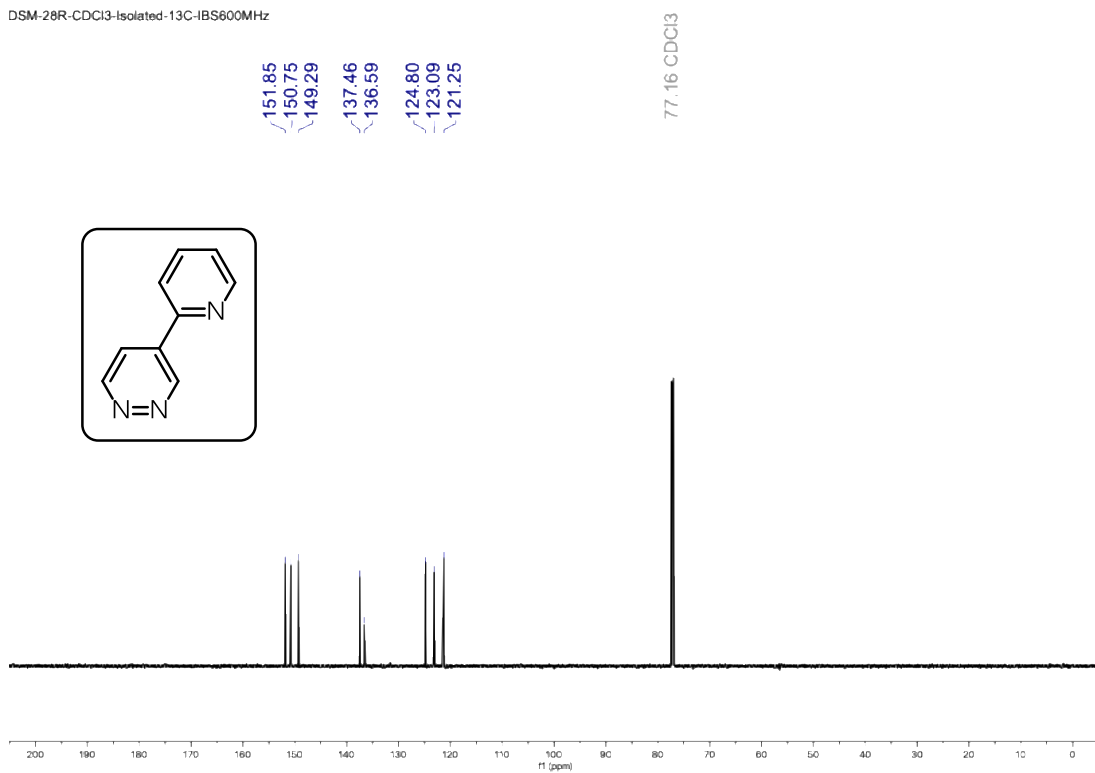

Figure S72. <sup>13</sup>C NMR spectrum of **27** in CDCl<sub>3</sub> at 25 °C.

DSM-58-CDCl3-Isolated-1H-IBS600MHz

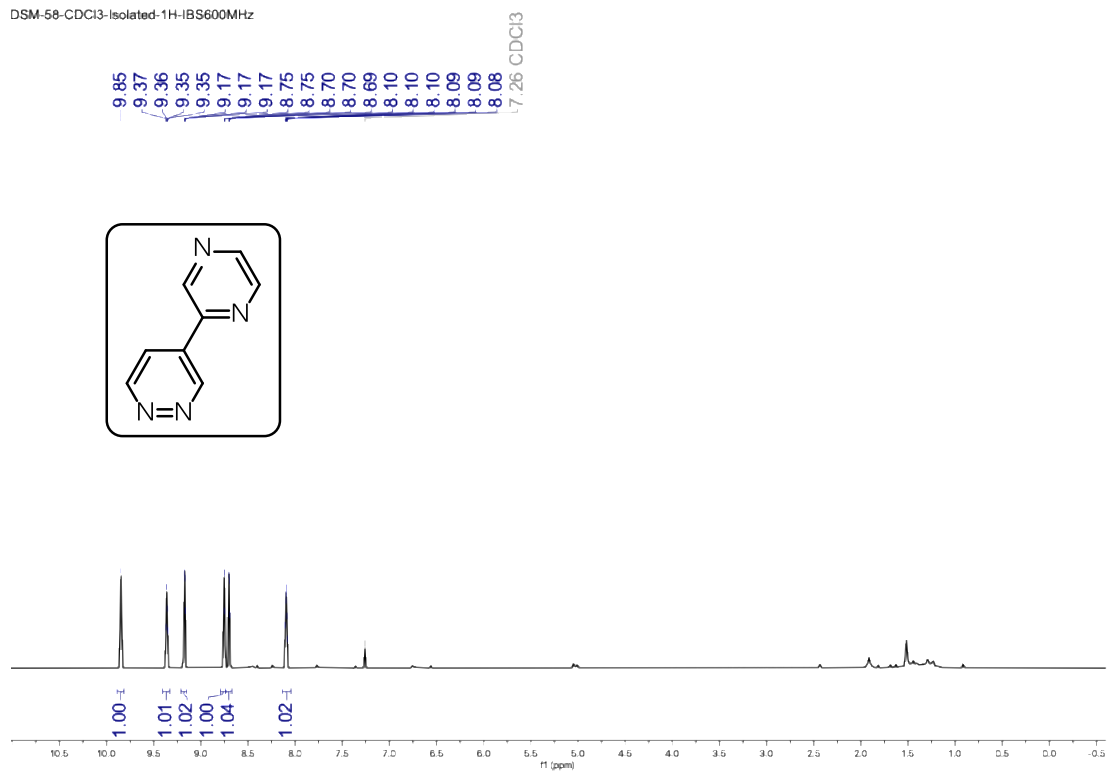

Figure S73.  $^1\text{H}$  NMR spectrum of **28** in  $\text{CDCl}_3$  at 25 °C.

Dsm-58-isolated-13C-cdcl3-IBS600

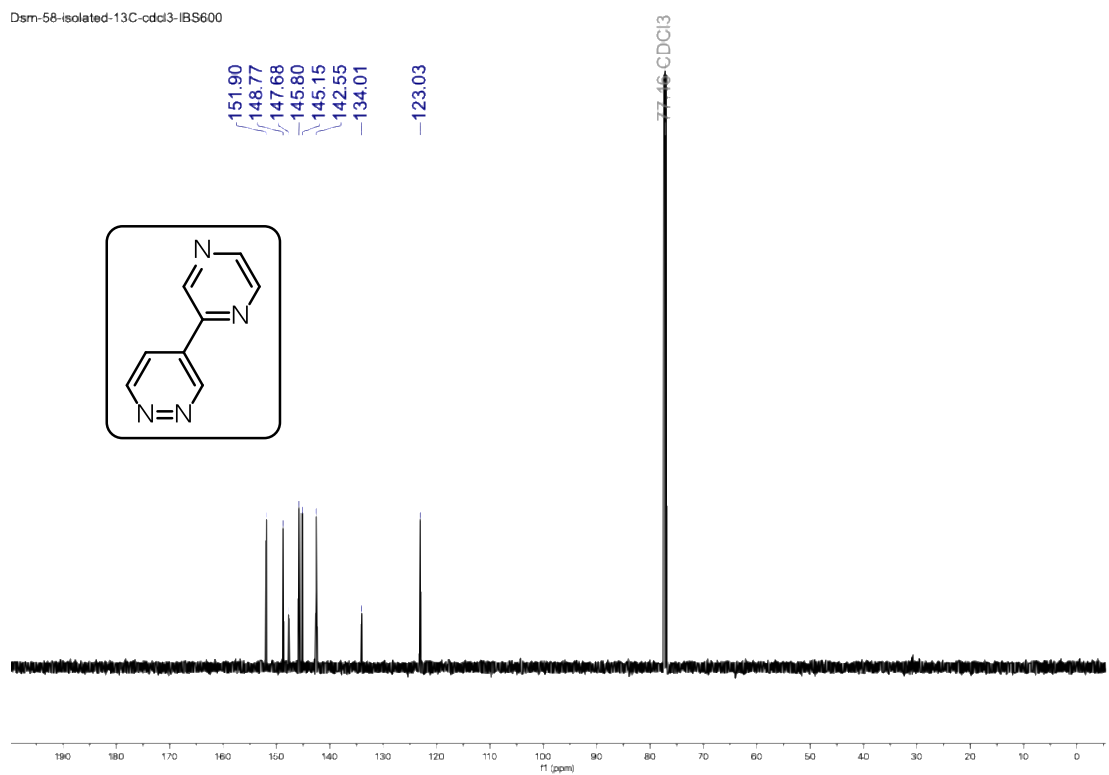

Figure S74.  $^{13}\text{C}$  NMR spectrum of **28** in  $\text{CDCl}_3$  at 25 °C.

DSM-09-CDCl3-1H-600MHz-Isolated

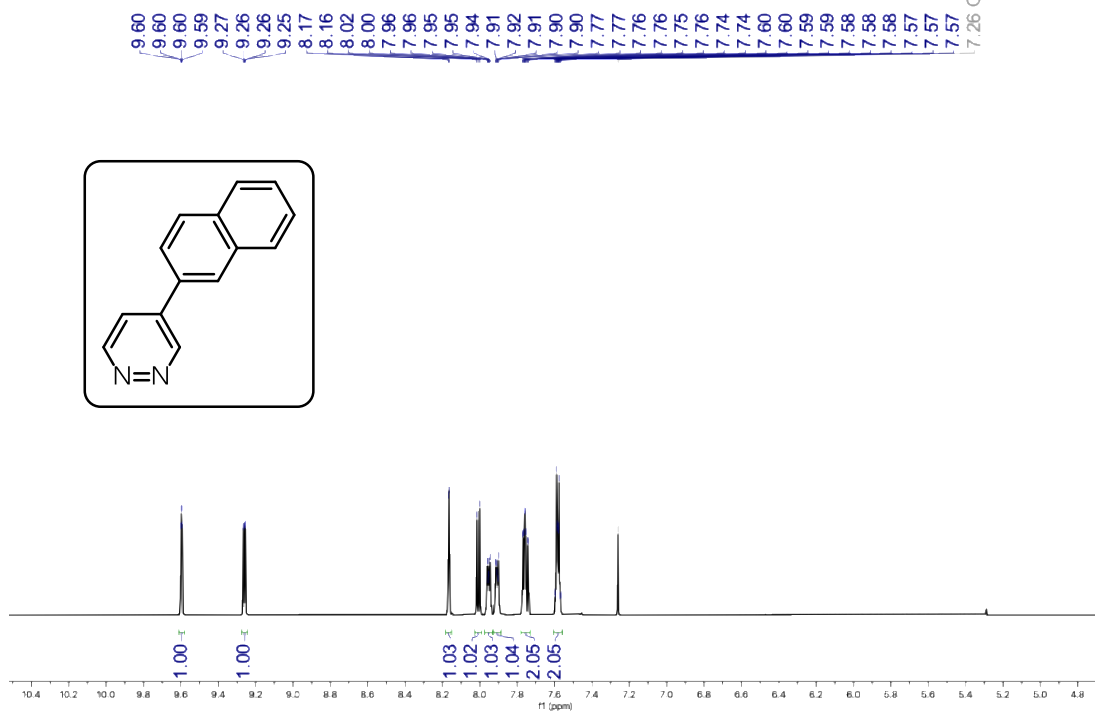

Figure S75. <sup>1</sup>H NMR spectrum of **29** in CDCl<sub>3</sub> at 25 °C.

DSM-09-CDCl3-13C-600MHz-Isolated

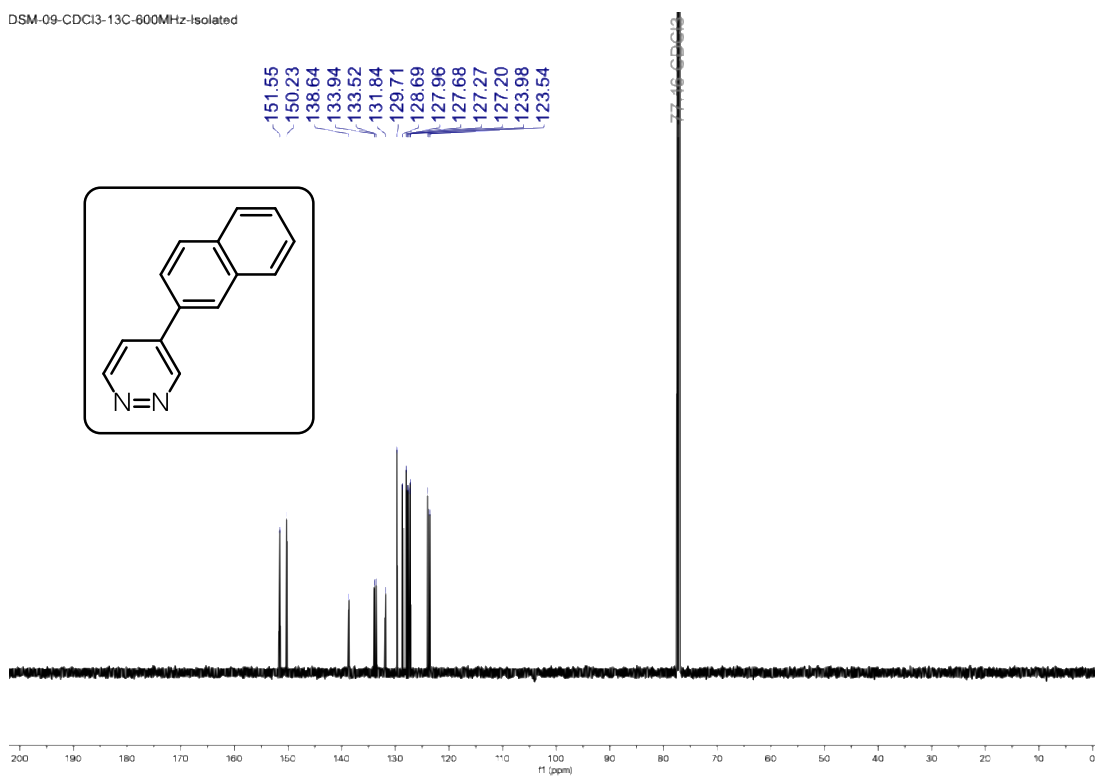

Figure S76. <sup>13</sup>C NMR spectrum of **29** in CDCl<sub>3</sub> at 25 °C.

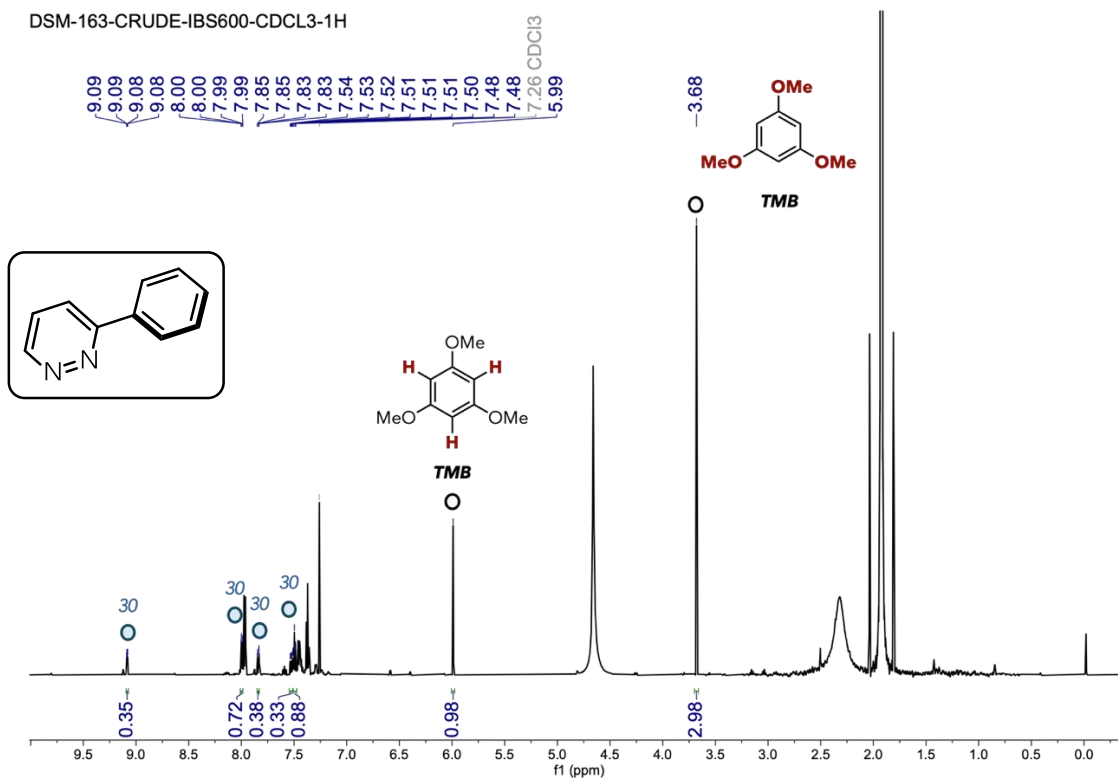

**Figure S77.**  $^1\text{H}$  NMR spectrum of **30** in  $\text{CDCl}_3$  at  $25^\circ\text{C}$ .

\* This NMR spectrum was obtained right after reaction completion with 1,3,5-trimethoxybenzene (TMB) as an internal standard.

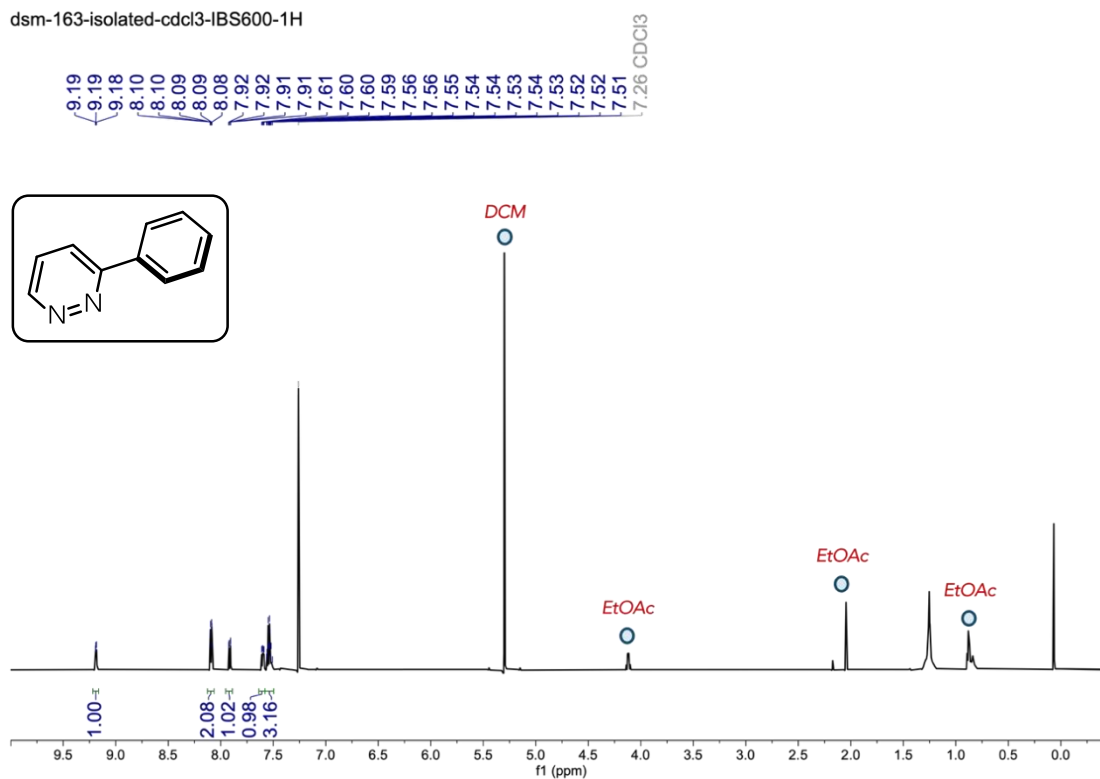

**Figure S78.**  $^1\text{H}$  NMR spectrum of **30** in  $\text{CDCl}_3$  at  $25^\circ\text{C}$ .

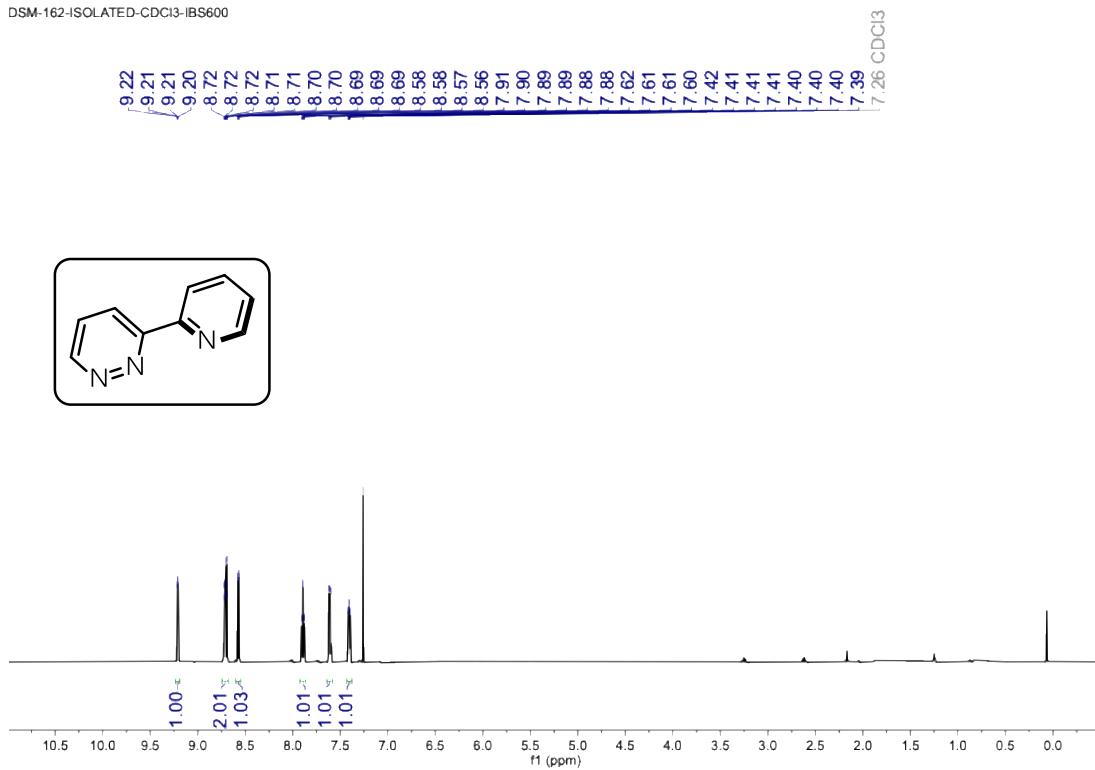

**Figure S79.** <sup>1</sup>H NMR spectrum of **31** in CDCl<sub>3</sub> at 25 °C.

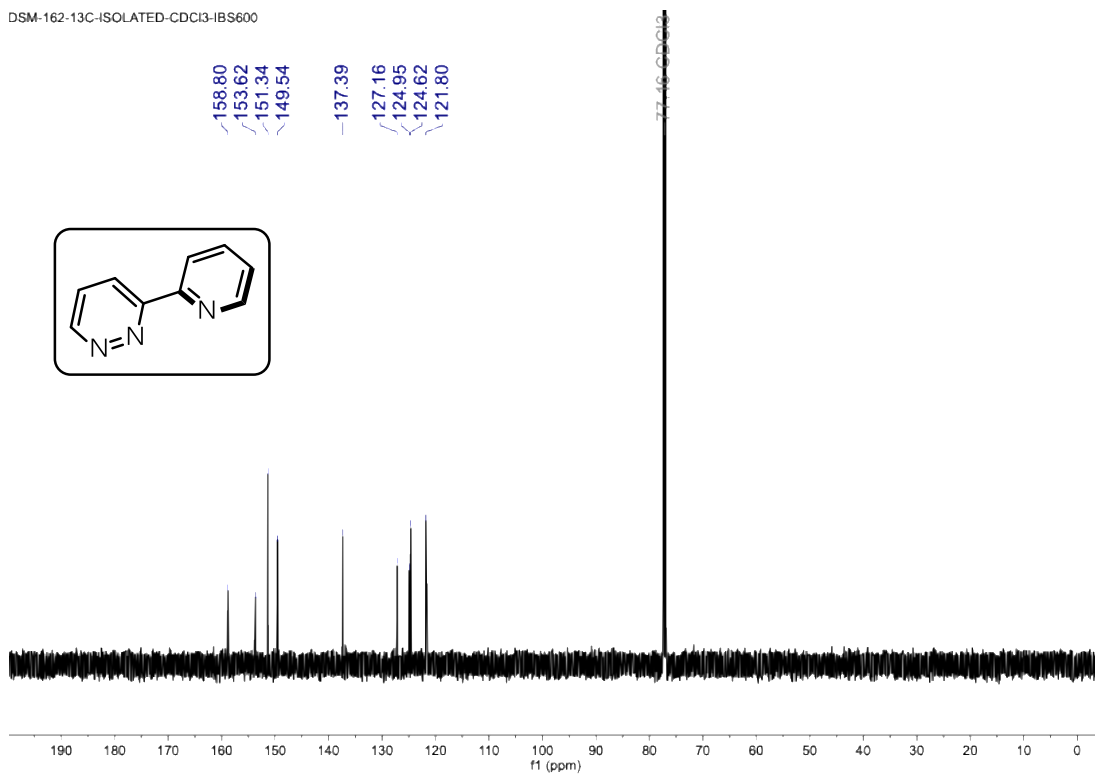

**Figure S80.** <sup>13</sup>C NMR spectrum of **31** in CDCl<sub>3</sub> at 25 °C.

DSM\_33A-Isolated-cdcl3-1H-IBS600

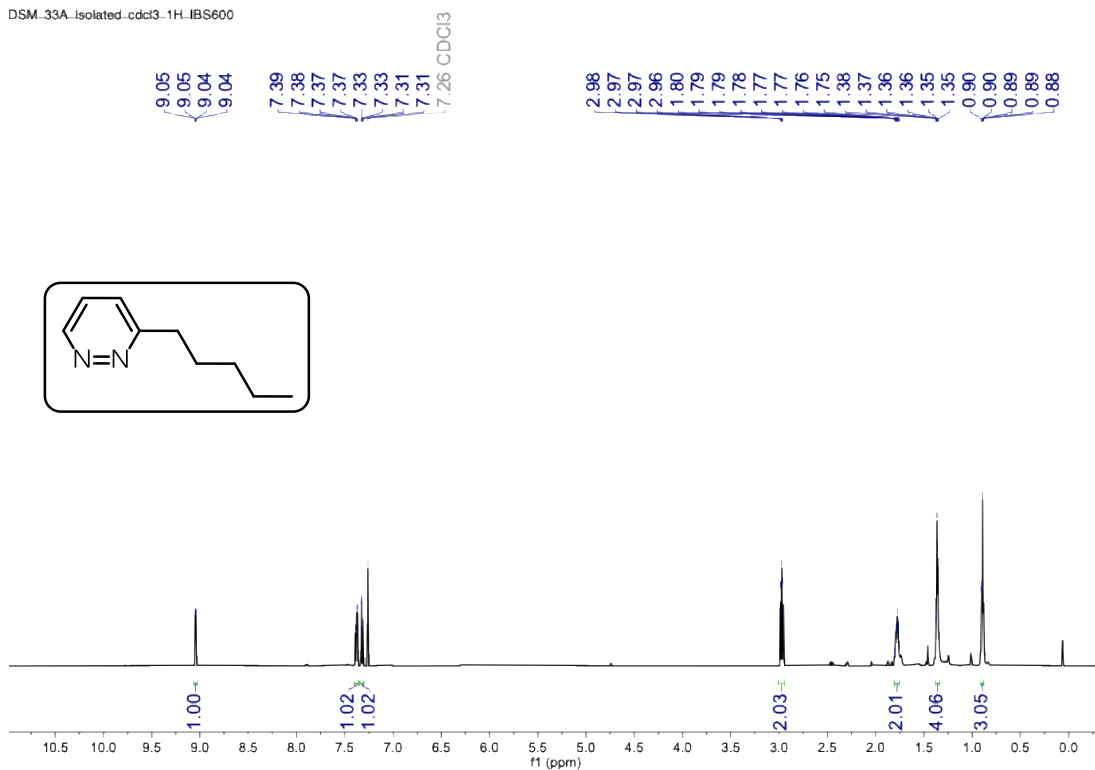

Figure S81. <sup>1</sup>H NMR spectrum of **32** in CDCl<sub>3</sub> at 25 °C.

DSM\_33A-Isolated-cdcl3-13C-AS400

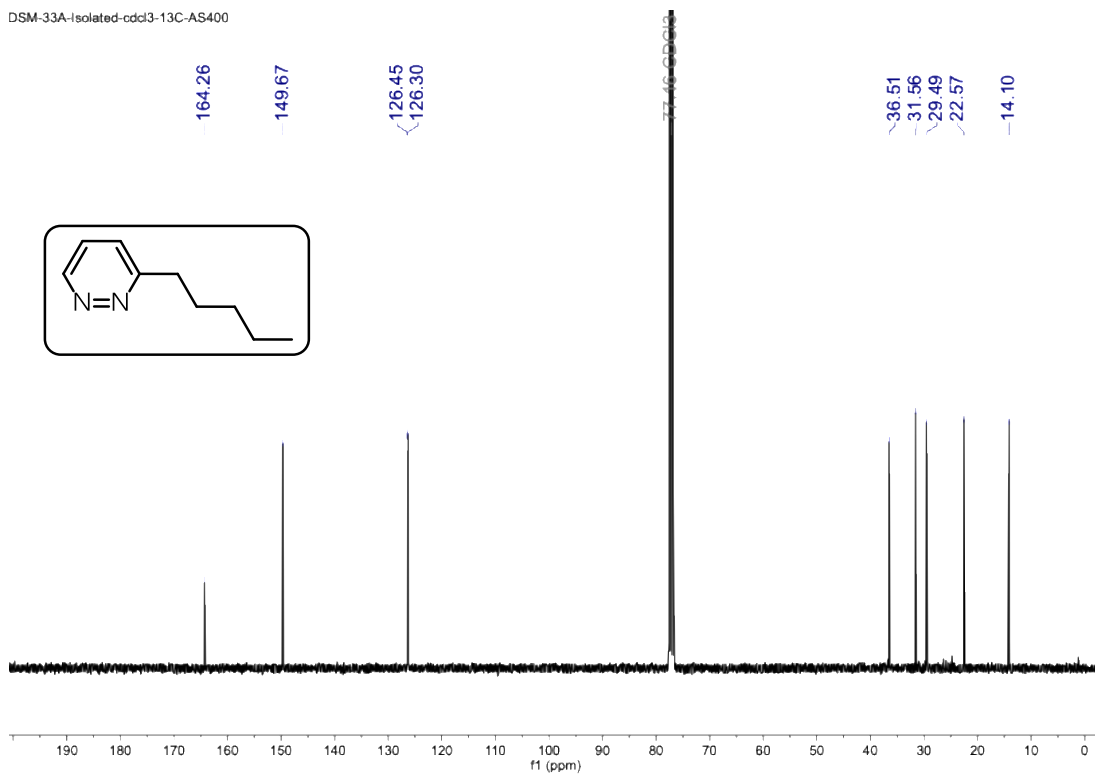

Figure S82. <sup>13</sup>C NMR spectrum of **32** in CDCl<sub>3</sub> at 25 °C.

DSM-36-Isolated-cdcl3-1H-IBS600

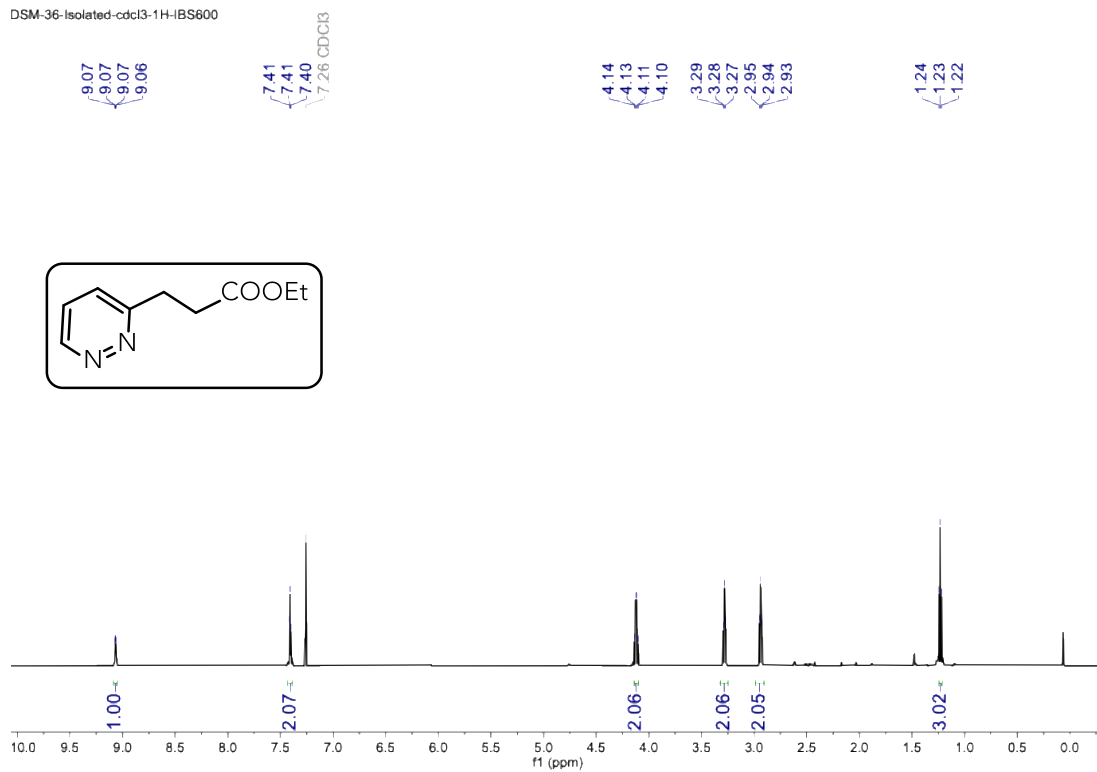

Figure S83.  $^1\text{H}$  NMR spectrum of **33** in  $\text{CDCl}_3$  at  $25\text{ }^\circ\text{C}$ .

DSM-36-Isolated-cdcl3-13C-AS400

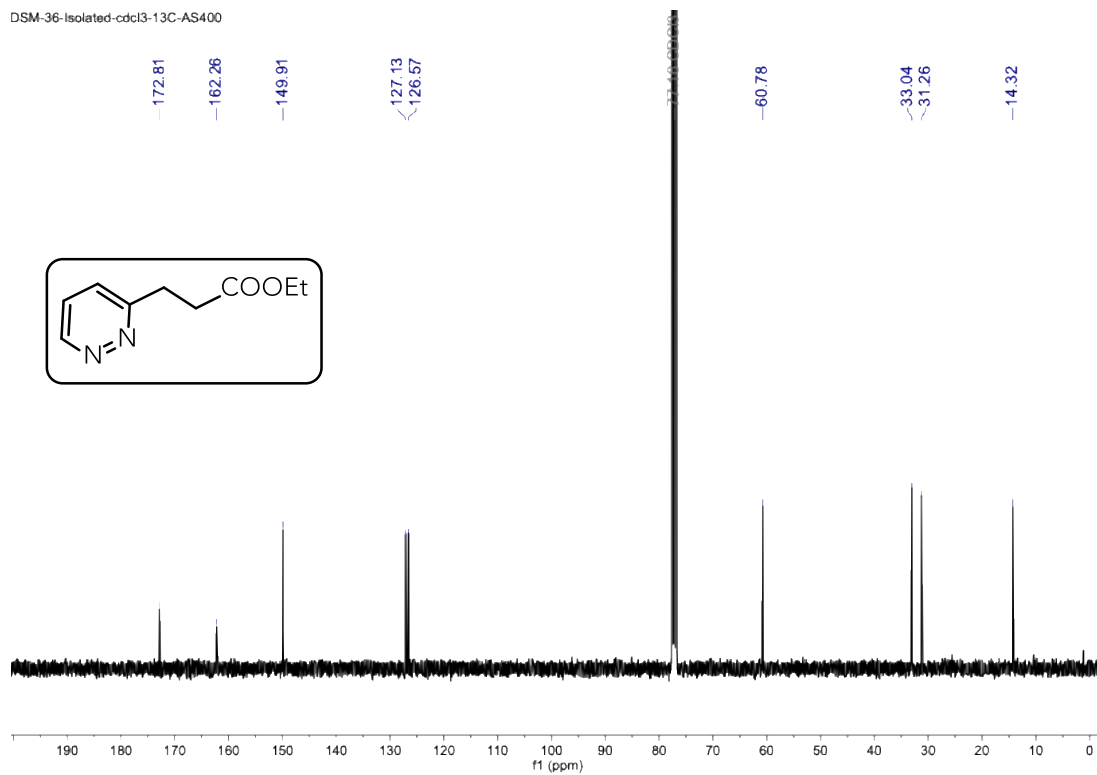

Figure S84.  $^{13}\text{C}$  NMR spectrum of **33** in  $\text{CDCl}_3$  at  $25\text{ }^\circ\text{C}$ .

DSM-97-CDCl3-1BS600MHz-Isolated

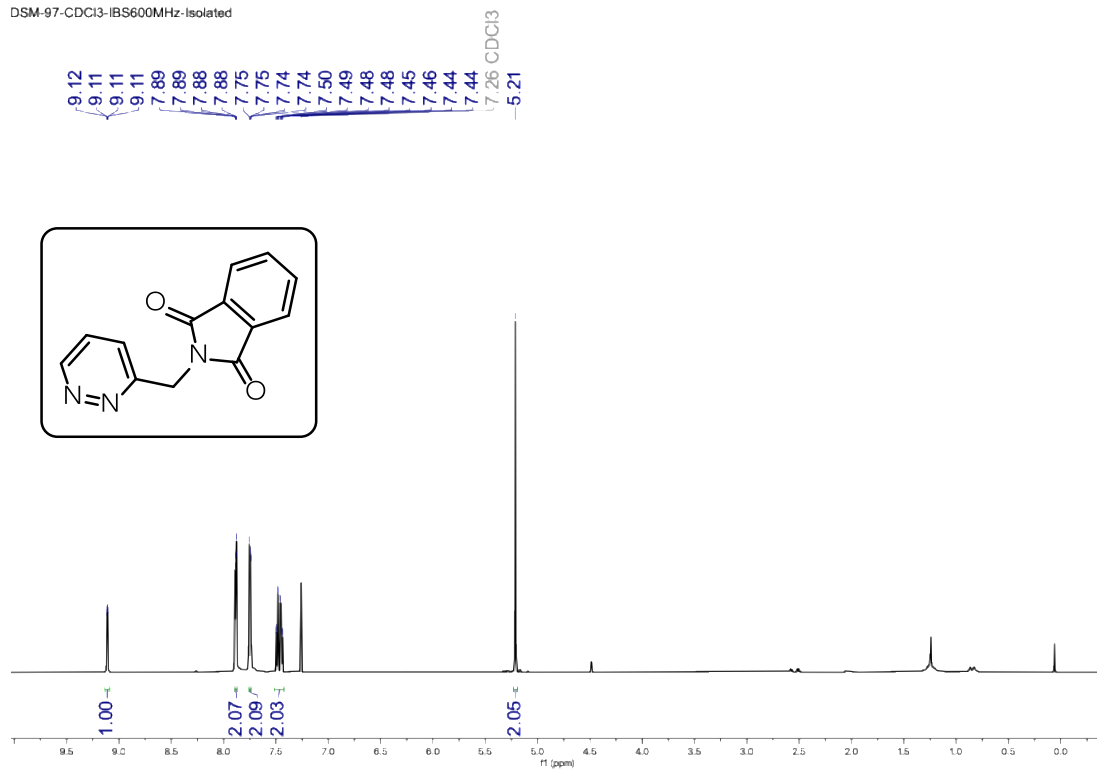

Figure S85. <sup>1</sup>H NMR spectrum of **34** in CDCl<sub>3</sub> at 25 °C.

DSM-97-CDCl3-1BS600MHz-Isolated

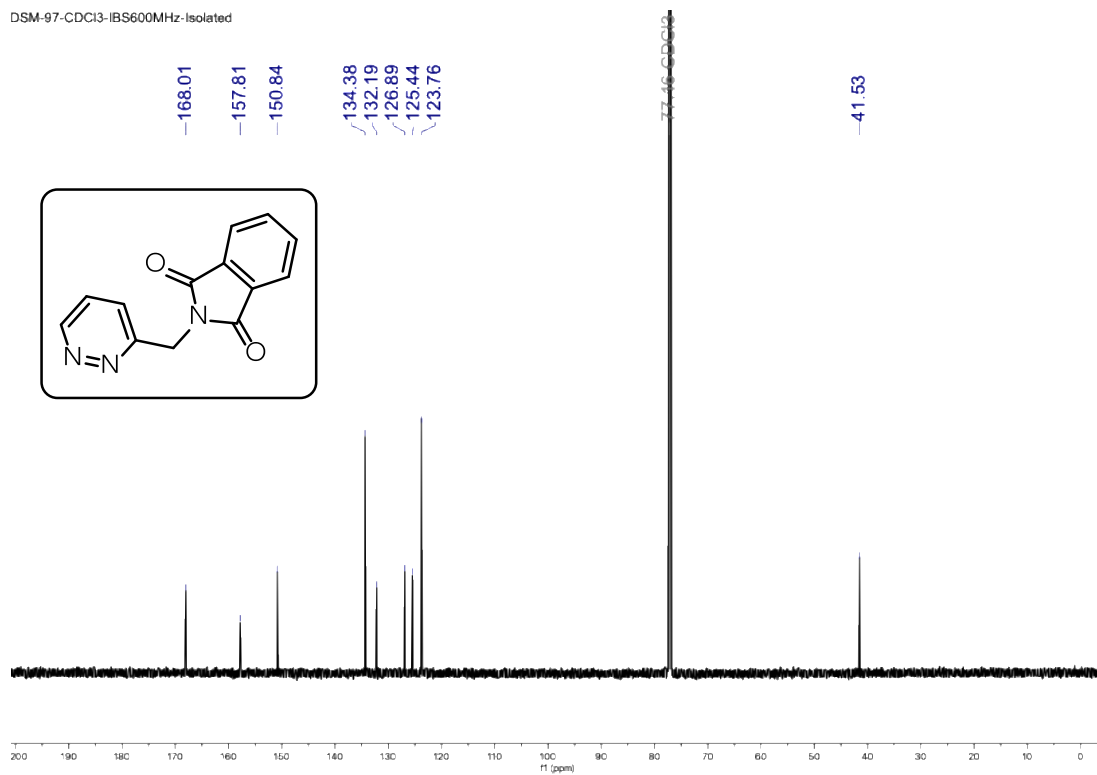

Figure S86. <sup>13</sup>C NMR spectrum of **34** in CDCl<sub>3</sub> at 25 °C.

DSM-85-ISOLATED-IBS600-CDCL3-1H

8.18  
8.17  
8.16  
8.16  
7.94  
7.57  
7.57  
7.56  
7.55  
7.55  
7.54  
7.54  
7.54  
7.53  
7.52  
7.52  
7.52  
7.51  
7.50  
7.26 CDCl<sub>3</sub>

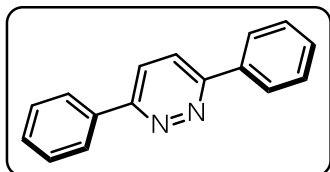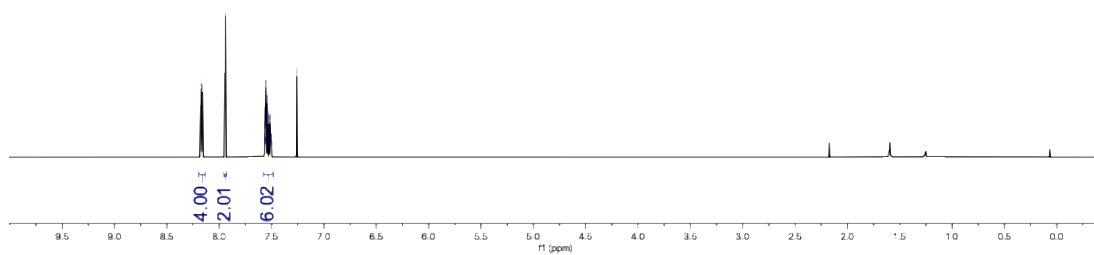

Figure S87. <sup>1</sup>H NMR spectrum of **35** in CDCl<sub>3</sub> at 25 °C.

DSM-85-ISOLATED-IBS600-CDCL3-13C

157.78  
136.27  
130.19  
129.20  
127.09  
124.35  
77.46 CDCl<sub>3</sub>

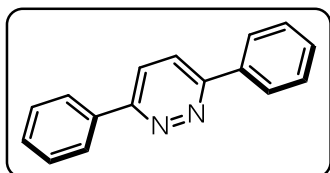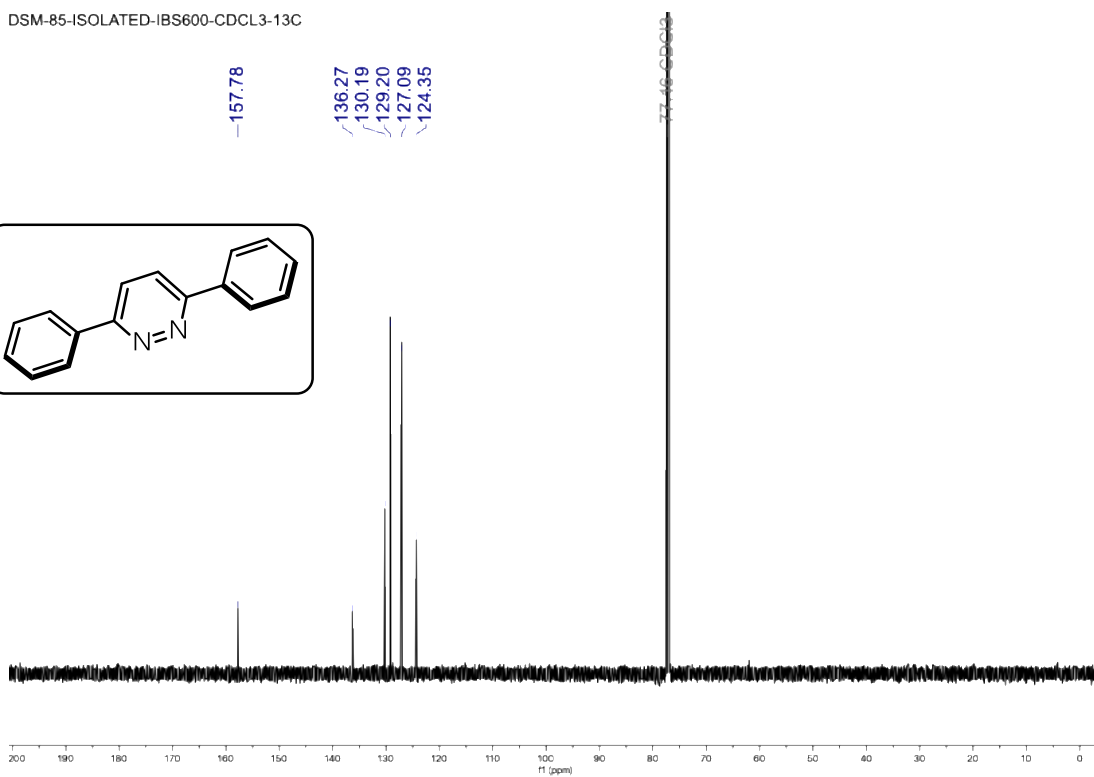

Figure S88. <sup>13</sup>C NMR spectrum of **35** in CDCl<sub>3</sub> at 25 °C.

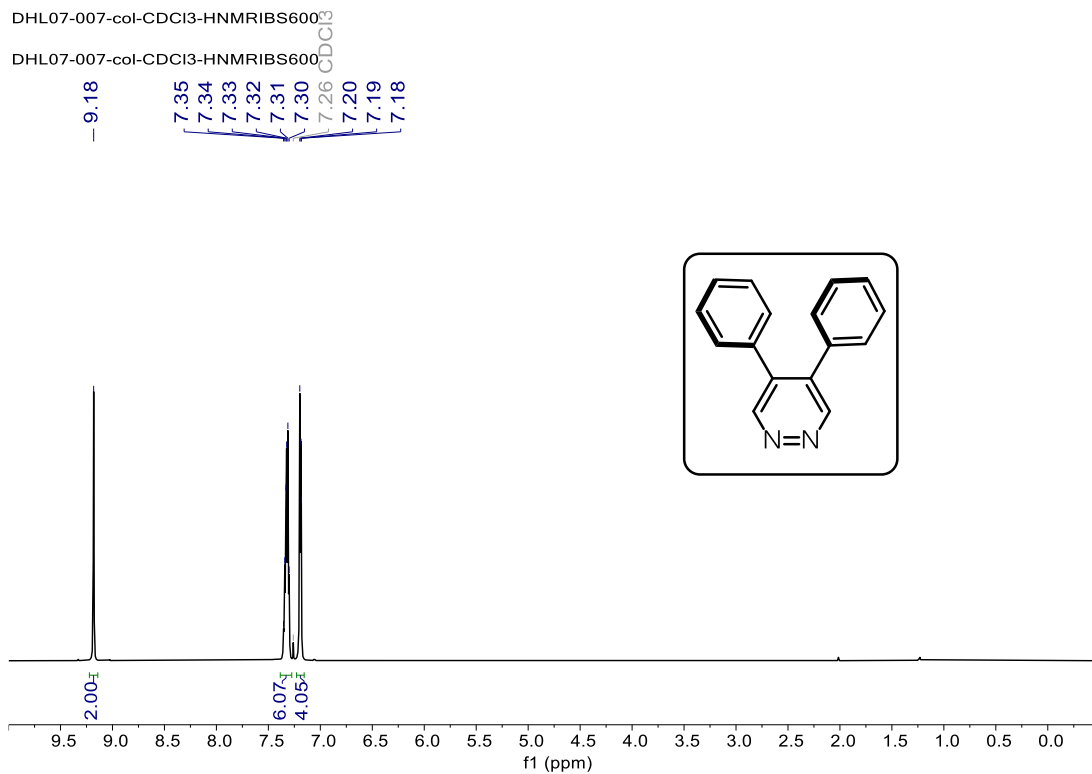

**Figure S89.** <sup>1</sup>H NMR spectrum of **4** in CDCl<sub>3</sub> at 25 °C.

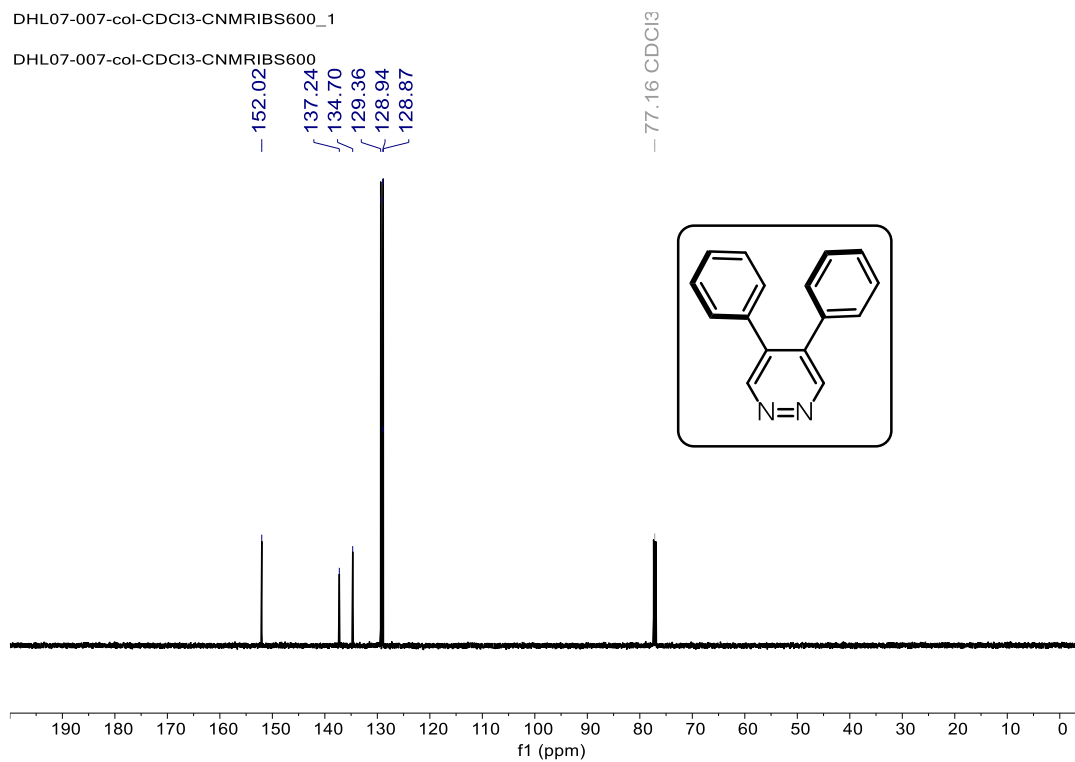

**Figure S90.** <sup>13</sup>C NMR spectrum of **4** in CDCl<sub>3</sub> at 25 °C.

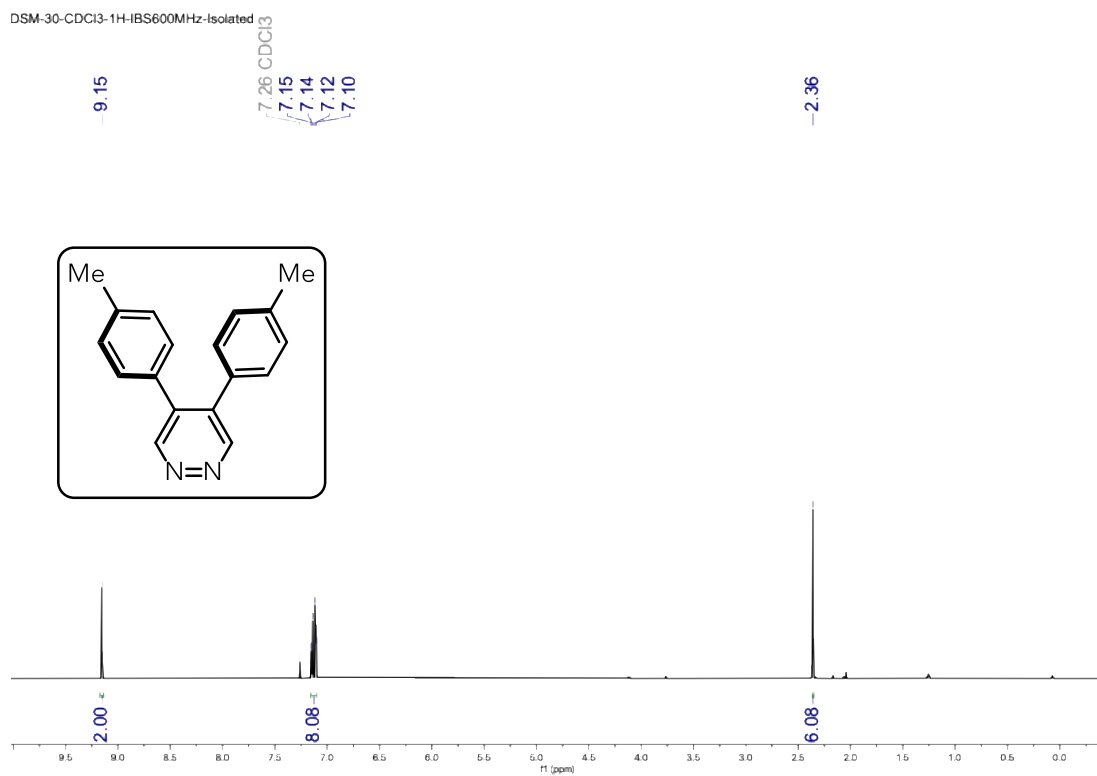

**Figure S91.**  $^1\text{H}$  NMR spectrum of **36** in  $\text{CDCl}_3$  at 25 °C.

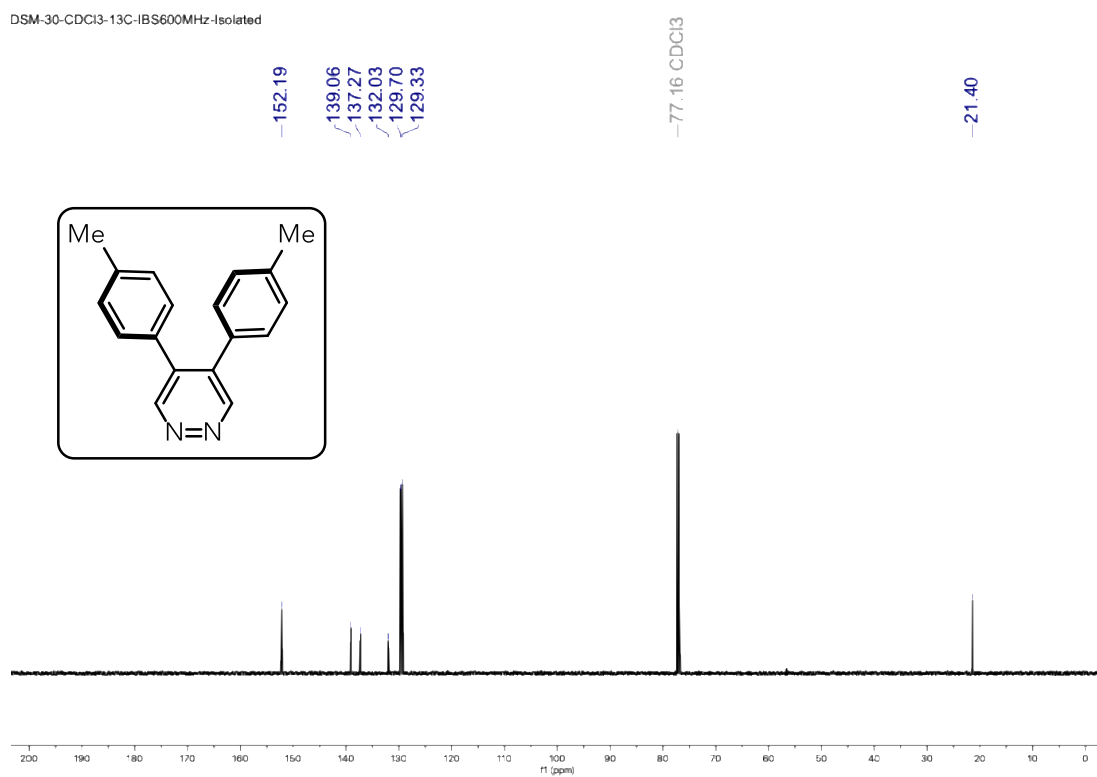

**Figure S92.**  $^{13}\text{C}$  NMR spectrum of **36** in  $\text{CDCl}_3$  at 25 °C.

DSM-29-CDCl3-1H-IBS600MHz-isolated

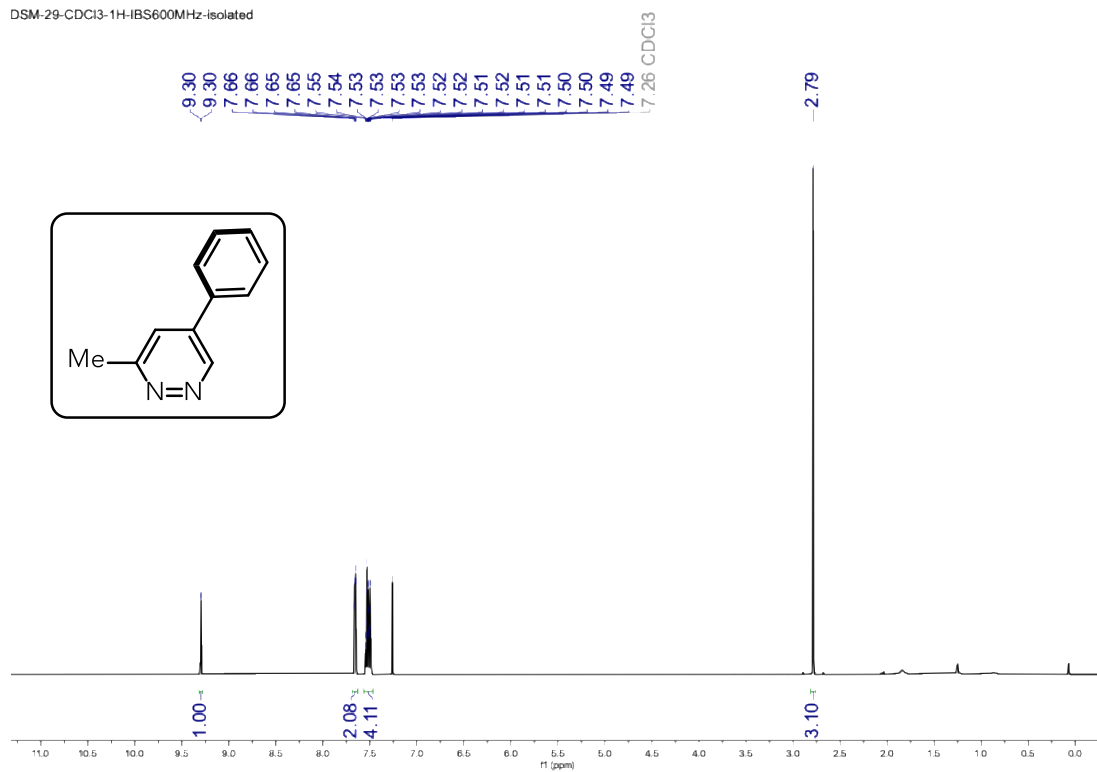

Figure S93. <sup>1</sup>H NMR spectrum of **37** in CDCl<sub>3</sub> at 25 °C.

DSM-29-CDCl3-13C-IBS600MHz-Isolated

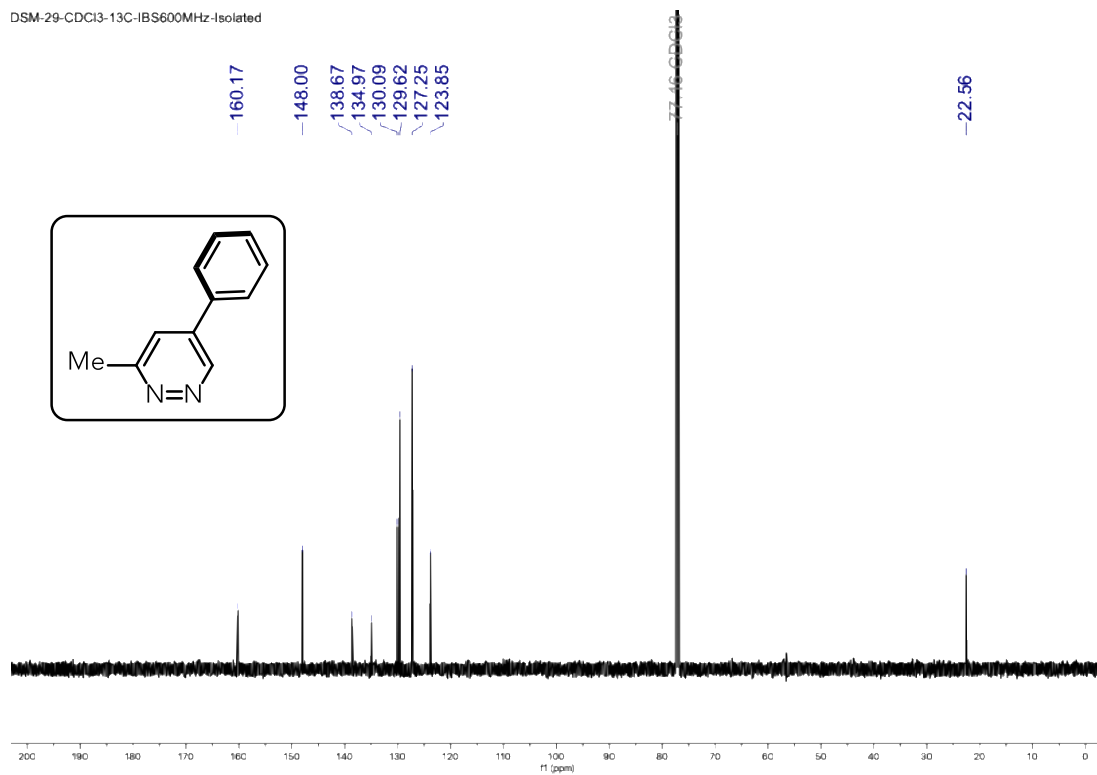

Figure S94. <sup>13</sup>C NMR spectrum of **37** in CDCl<sub>3</sub> at 25 °C.

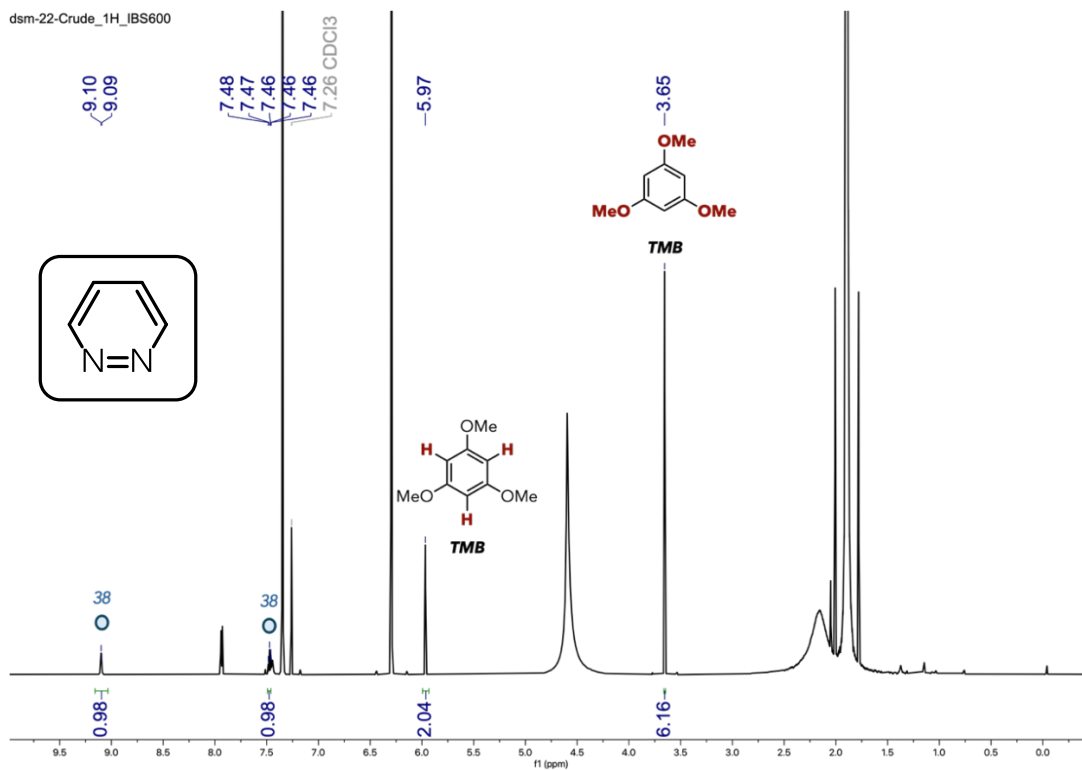

**Figure S95.** <sup>1</sup>H NMR spectrum of **38** in CDCl<sub>3</sub> at 25 °C.

\* This NMR spectrum was obtained right after reaction completion with 1,3,5-trimethoxybenzene (TMB) as an internal standard.

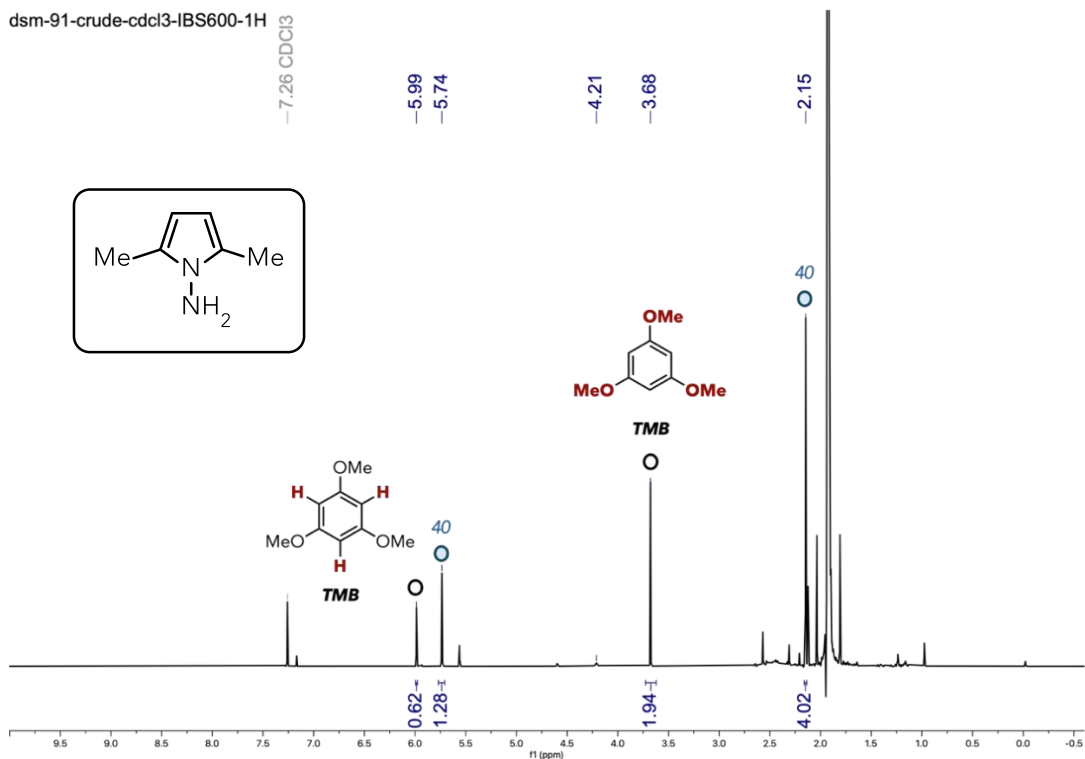

**Figure S96.** <sup>1</sup>H NMR spectrum of **39** in CDCl<sub>3</sub> at 25 °C.

\* This NMR spectrum was obtained right after reaction completion with 1,3,5-trimethoxybenzene (TMB) as an internal standard.

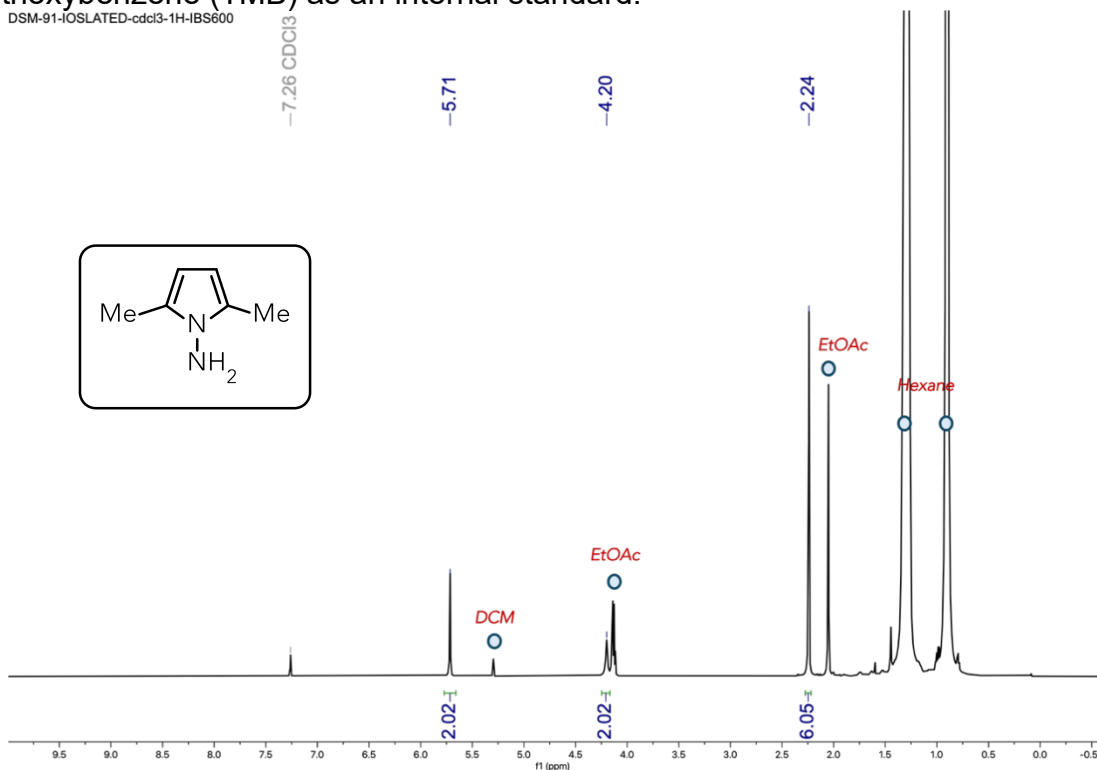

**Figure S97.** <sup>1</sup>H NMR spectrum of **39** in CDCl<sub>3</sub> at 25 °C.

\* This NMR spectrum is obtained with a solvent because of volatility.

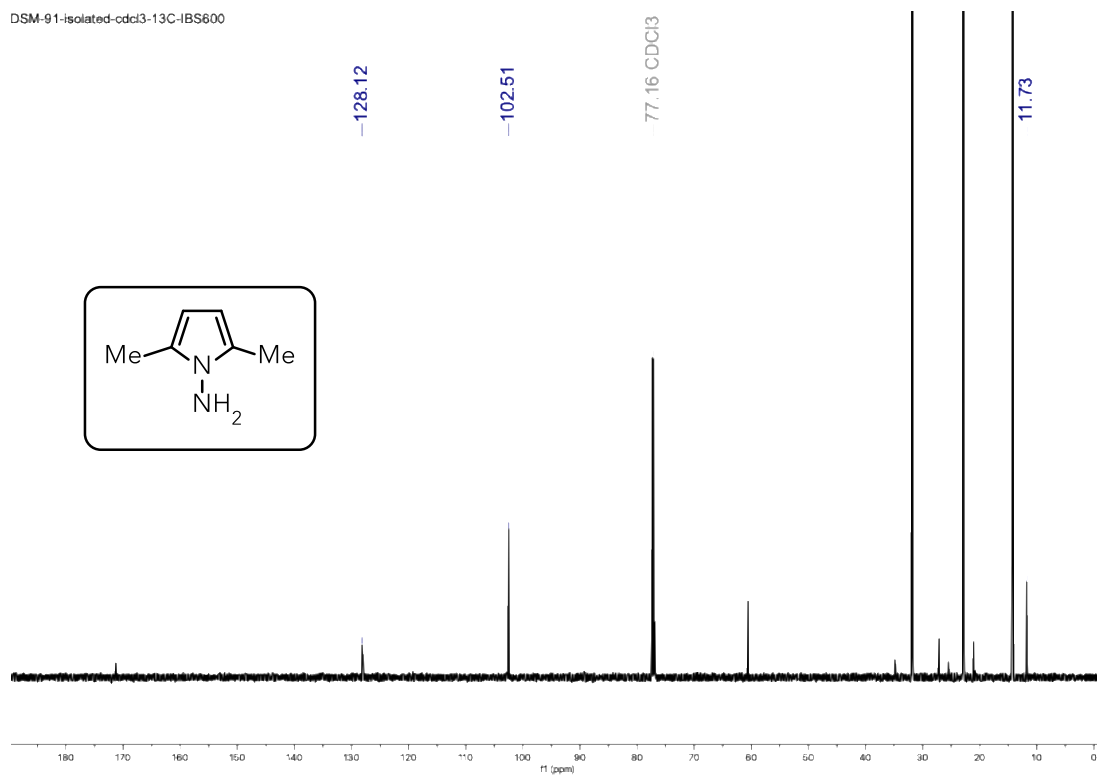

**Figure S98.**  $^{13}\text{C}$  NMR spectrum of **39** in  $\text{CDCl}_3$  at 25 °C.

\* This NMR spectrum is obtained with a solvent because of volatility.

dsm-18-crude-1H-cdcl3

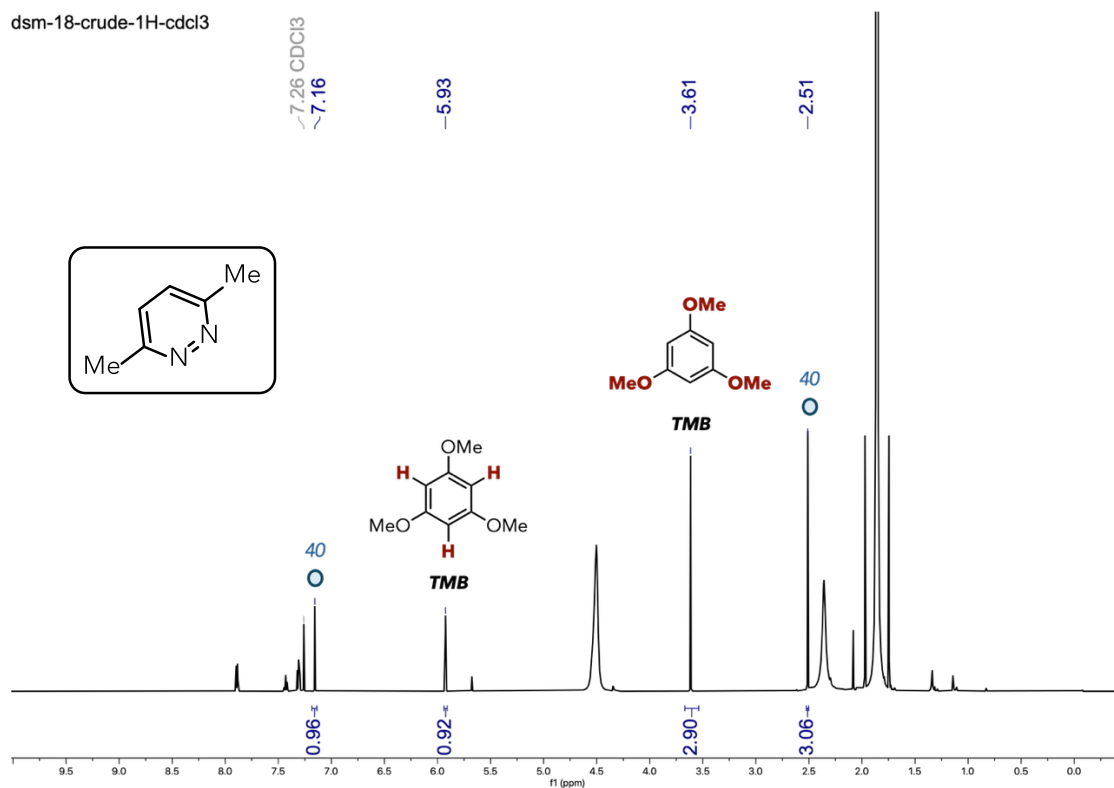

**Figure S99.** <sup>1</sup>H NMR spectrum of **40** in CDCl<sub>3</sub> at 25 °C.

\* This NMR spectrum was obtained right after reaction completion with 1,3,5-trimethoxybenzene (TMB) as an internal standard.

DHL06-069-2-basaluminacol-CDCl3-HNMRV500.447.fid  
DHL06-069-2-basaluminacol-CDCl3-HNMRV500

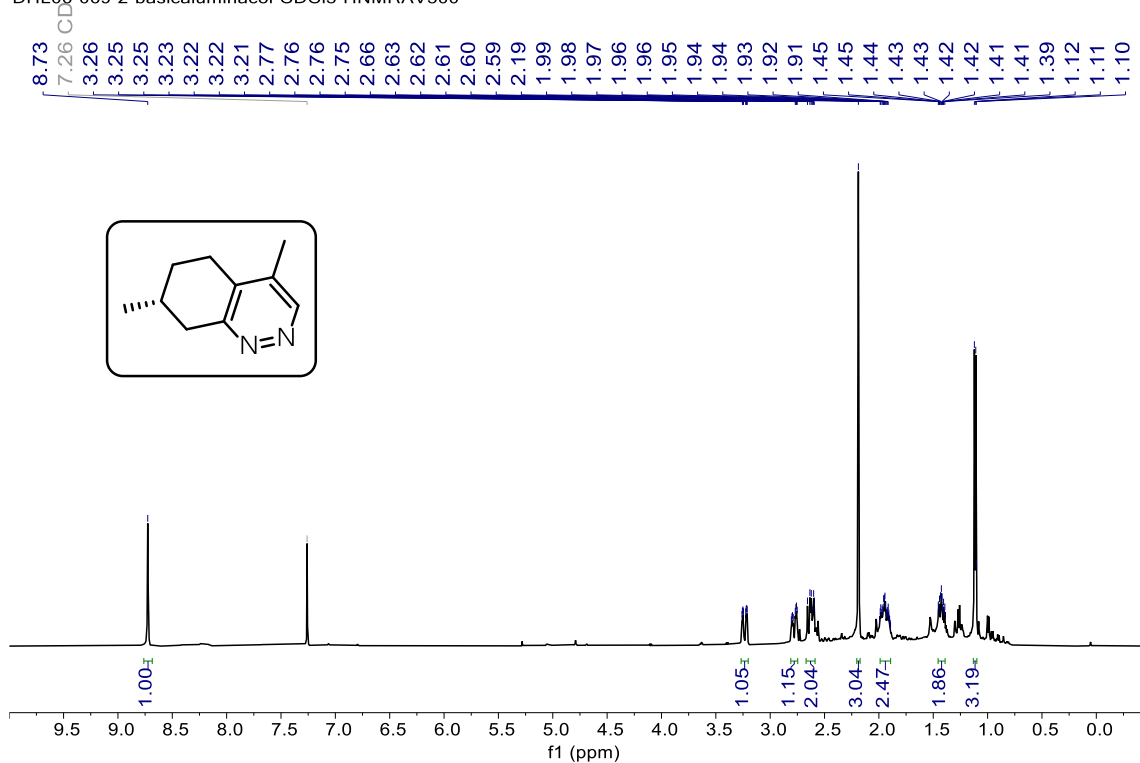

Figure S100. <sup>1</sup>H NMR spectrum of **41** in CDCl<sub>3</sub> at 25 °C.

DHL06-069-2-basaluminacol-CDCl3-13CNMRV500\_1.449.fid  
DHL06-069-2-basaluminacol-CDCl3-13CNMRV500\_1

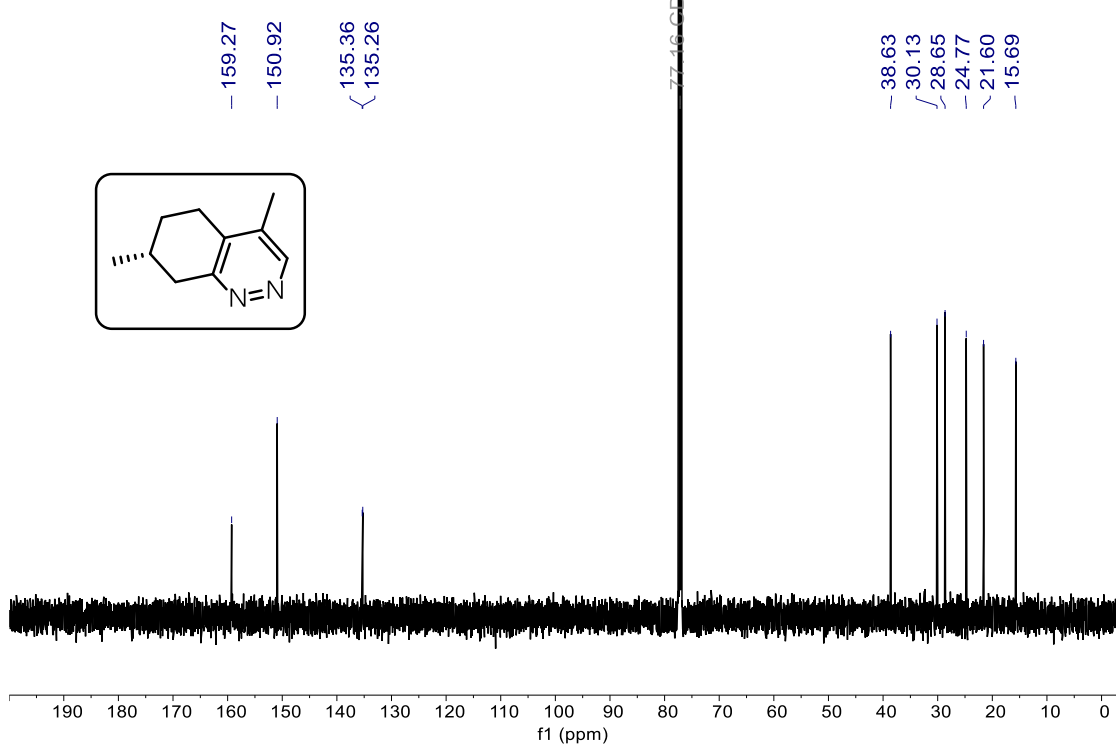

Figure S101. <sup>13</sup>C NMR spectrum of **41** in CDCl<sub>3</sub> at 25 °C.

DHL06-086-2-col2-DMSOd6-HNMRIBS600

DHL06-086-2-col2-DMSOd6-HNMRIBS600

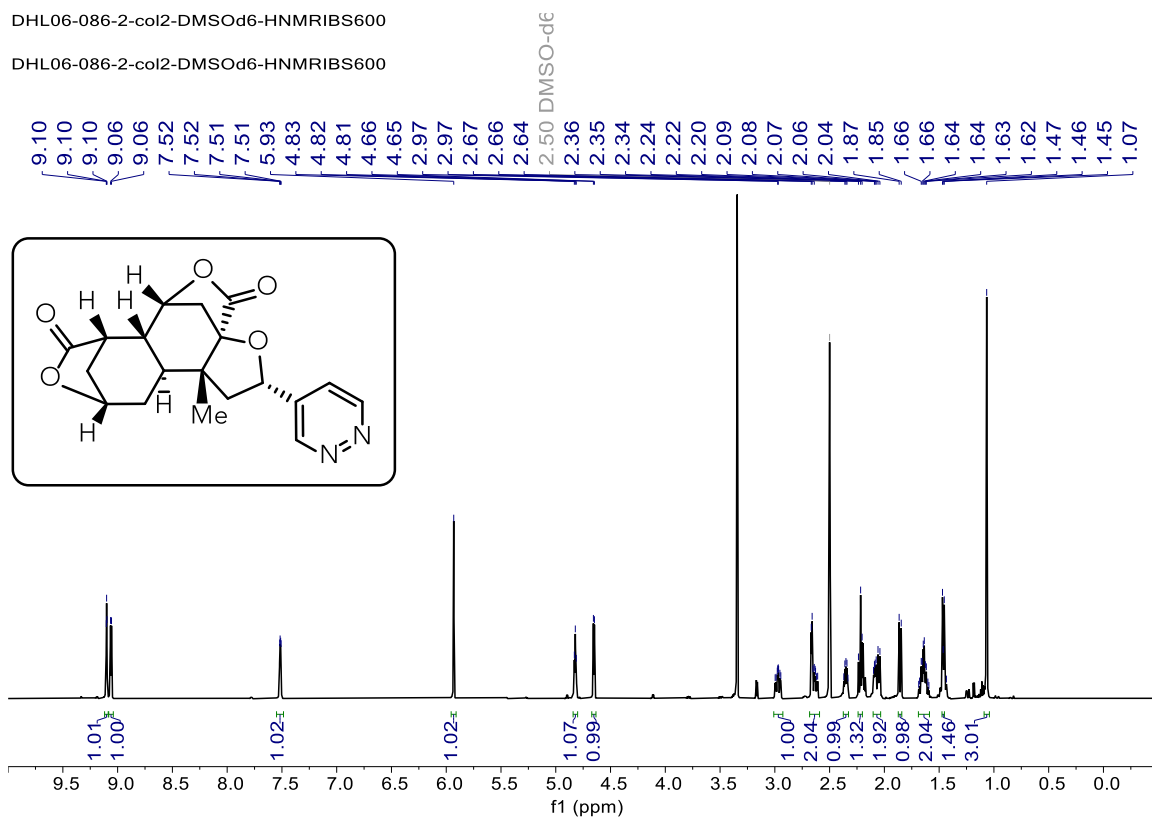

Figure S102.  $^1\text{H}$  NMR spectrum of **42** in  $\text{DMSO-d}_6$  at  $25\text{ }^\circ\text{C}$ .

DHL06-086-2-col2-DMSOd6-CNMRIBS600\_3

DHL06-086-2-col2-DMSOd6-CNMRIBS600

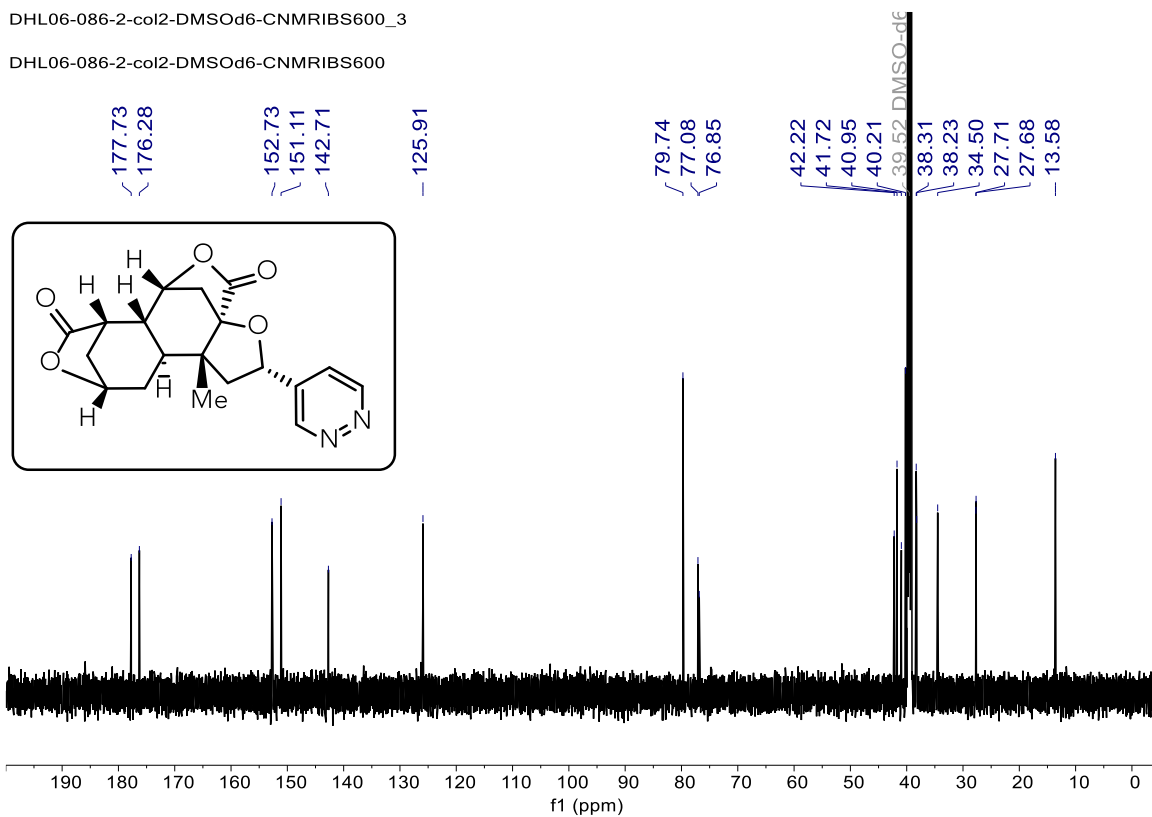

Figure S103.  $^{13}\text{C}$  NMR spectrum of **42** in  $\text{DMSO-d}_6$  at  $25\text{ }^\circ\text{C}$ .



DSM-160-Isolated-cdcl3-1H-IBS600

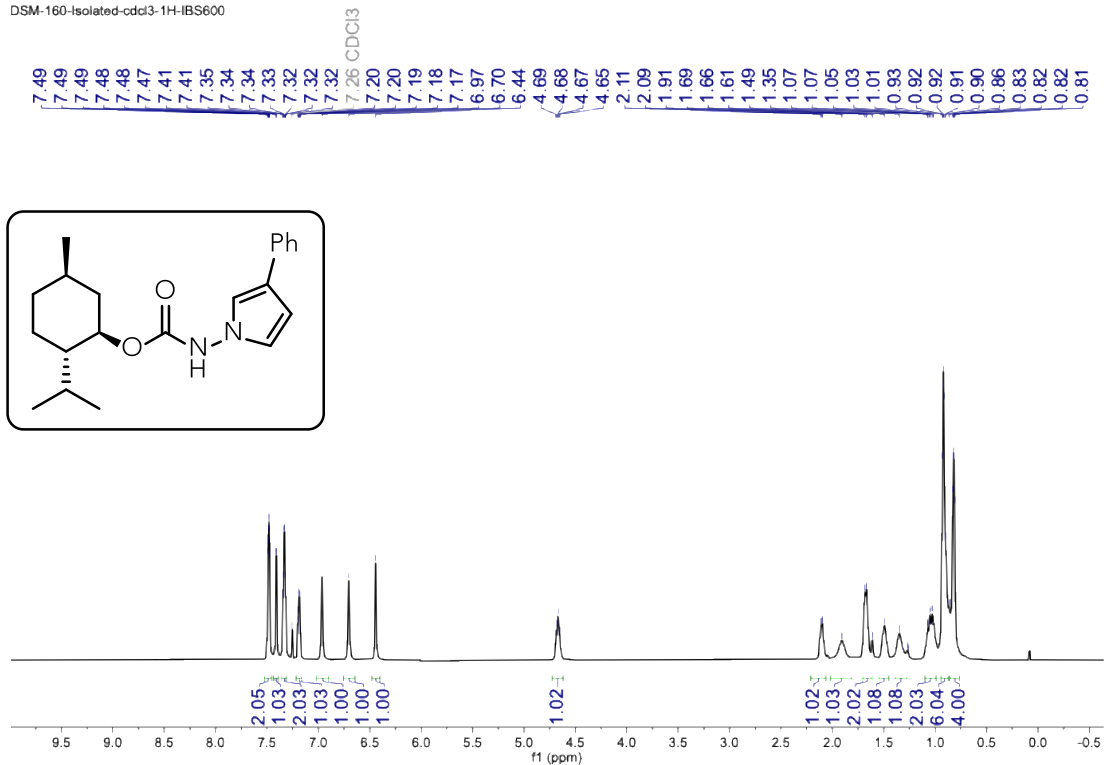

Figure S106.  $^1\text{H}$  NMR spectrum of **44** in  $\text{CDCl}_3$  at 25 °C.

DSM-160-CDCl3-Isolated-cdcl3-13C-as400

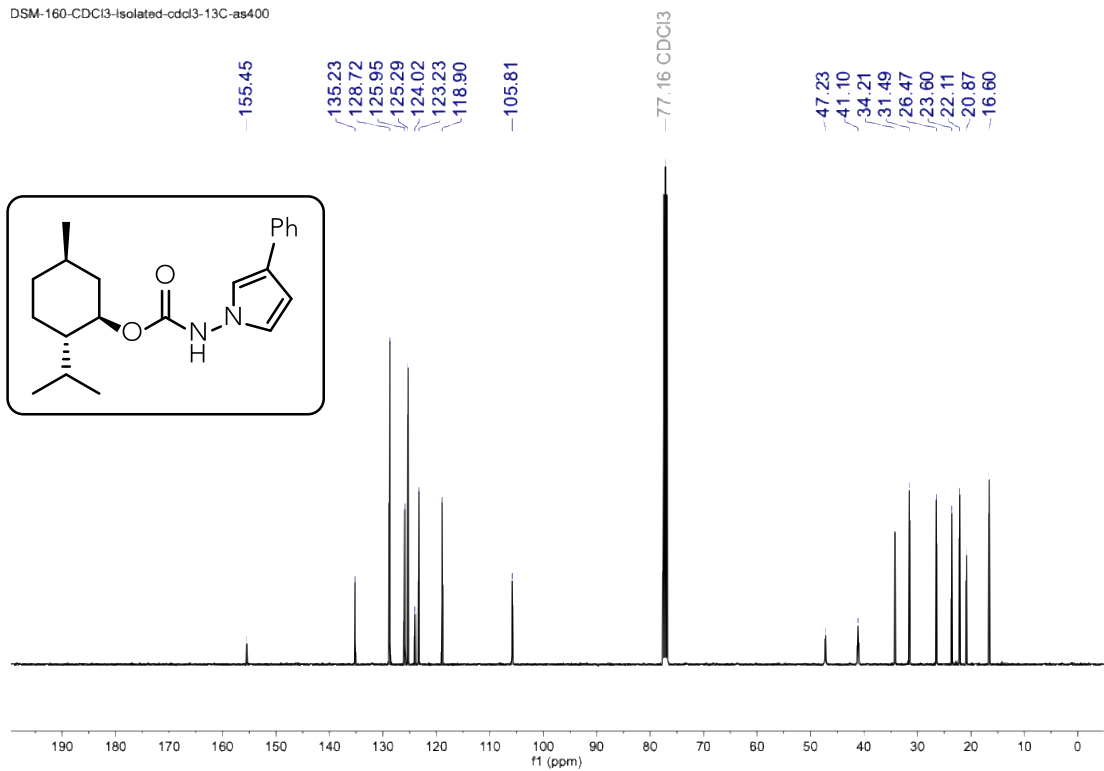

Figure S107.  $^{13}\text{C}$  NMR spectrum of **44** in  $\text{CDCl}_3$  at 25 °C.

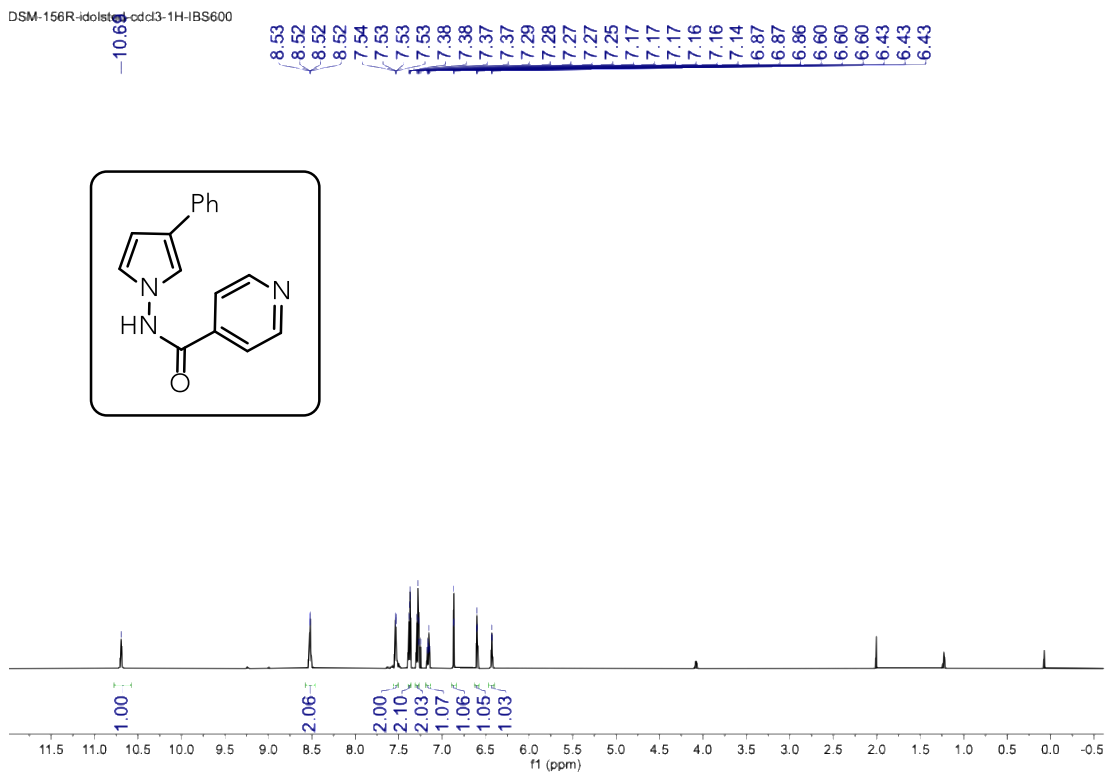

**Figure S108.**  $^1\text{H}$  NMR spectrum of **45** in  $\text{CDCl}_3$  at 25 °C.

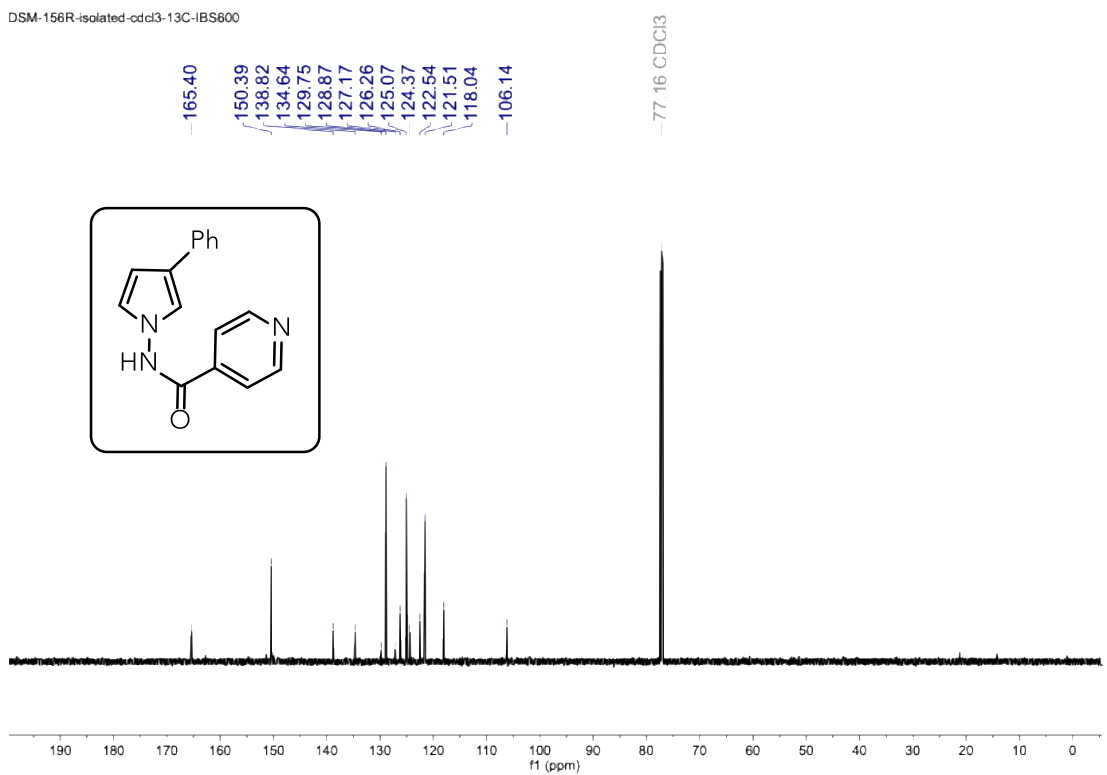

**Figure S109.**  $^{13}\text{C}$  NMR spectrum of **45** in  $\text{CDCl}_3$  at 25 °C.

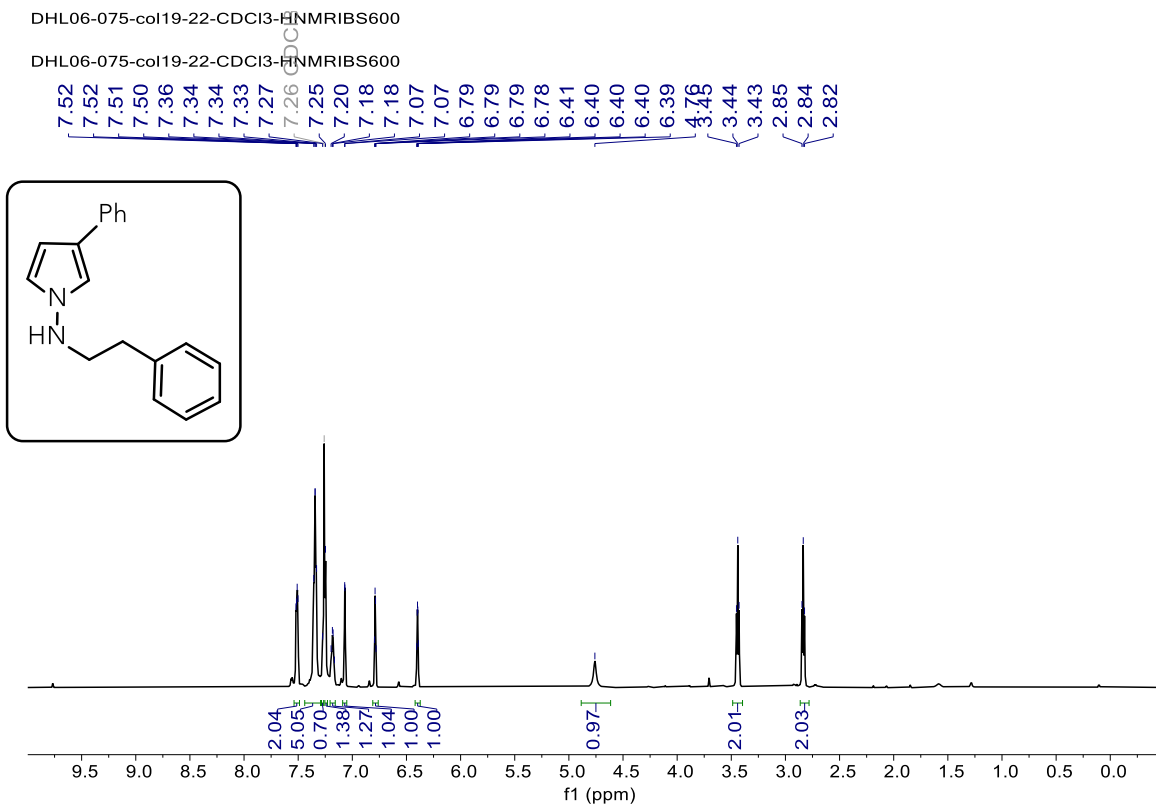

**Figure S110.**  $^1\text{H}$  NMR spectrum of **46** in  $\text{CDCl}_3$  at 25 °C.

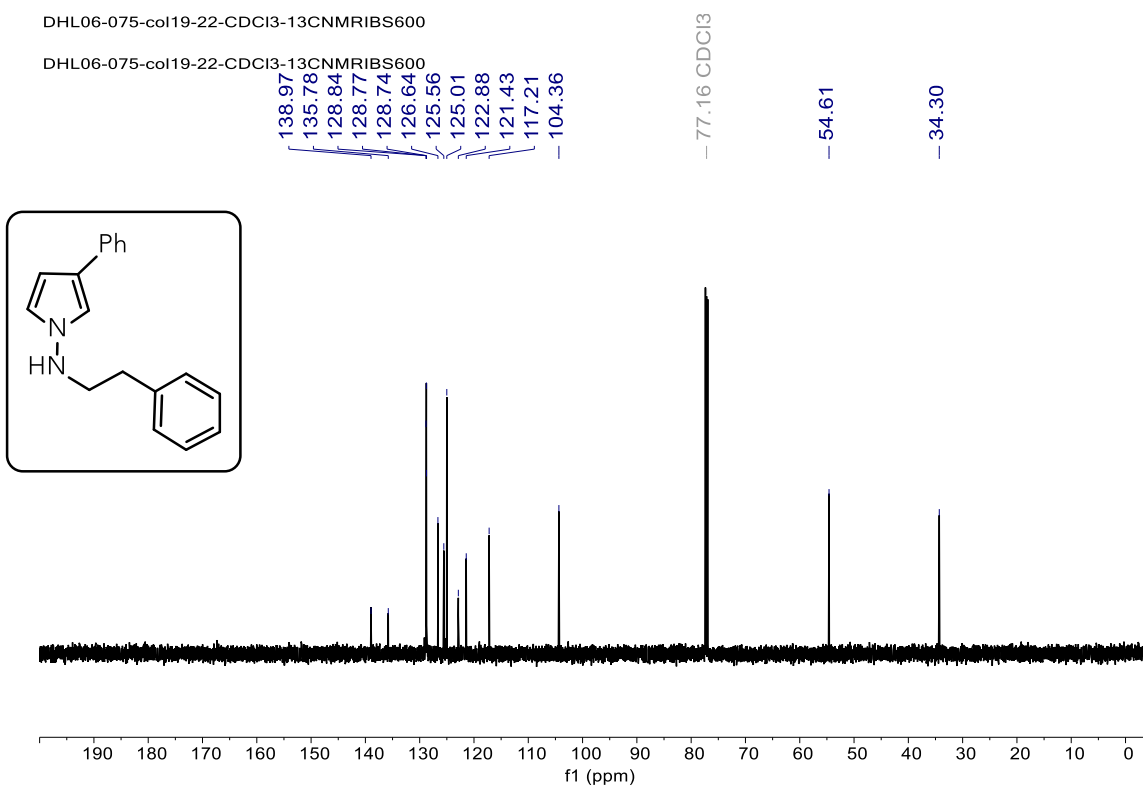

**Figure S111.**  $^{13}\text{C}$  NMR spectrum of **46** in  $\text{CDCl}_3$  at 25 °C.

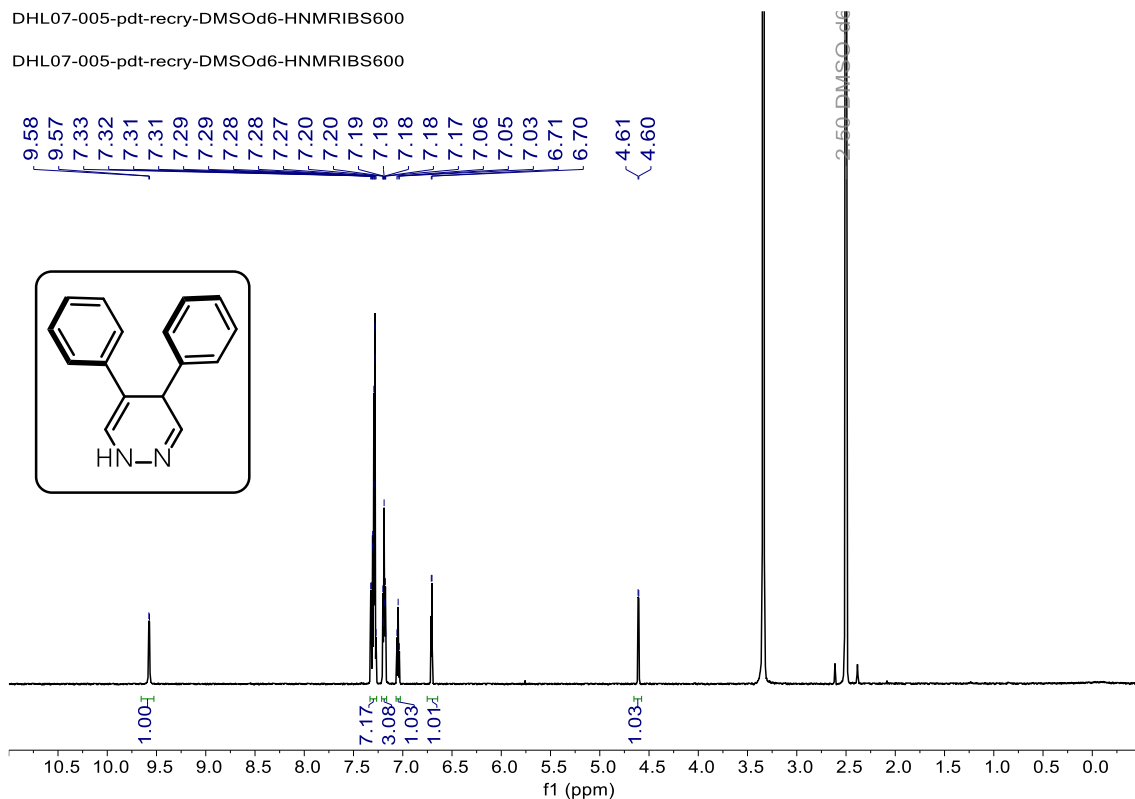

**Figure S112.** <sup>1</sup>H NMR spectrum of **H<sub>2</sub>-4** in DMSO-d<sub>6</sub> at 25 °C.

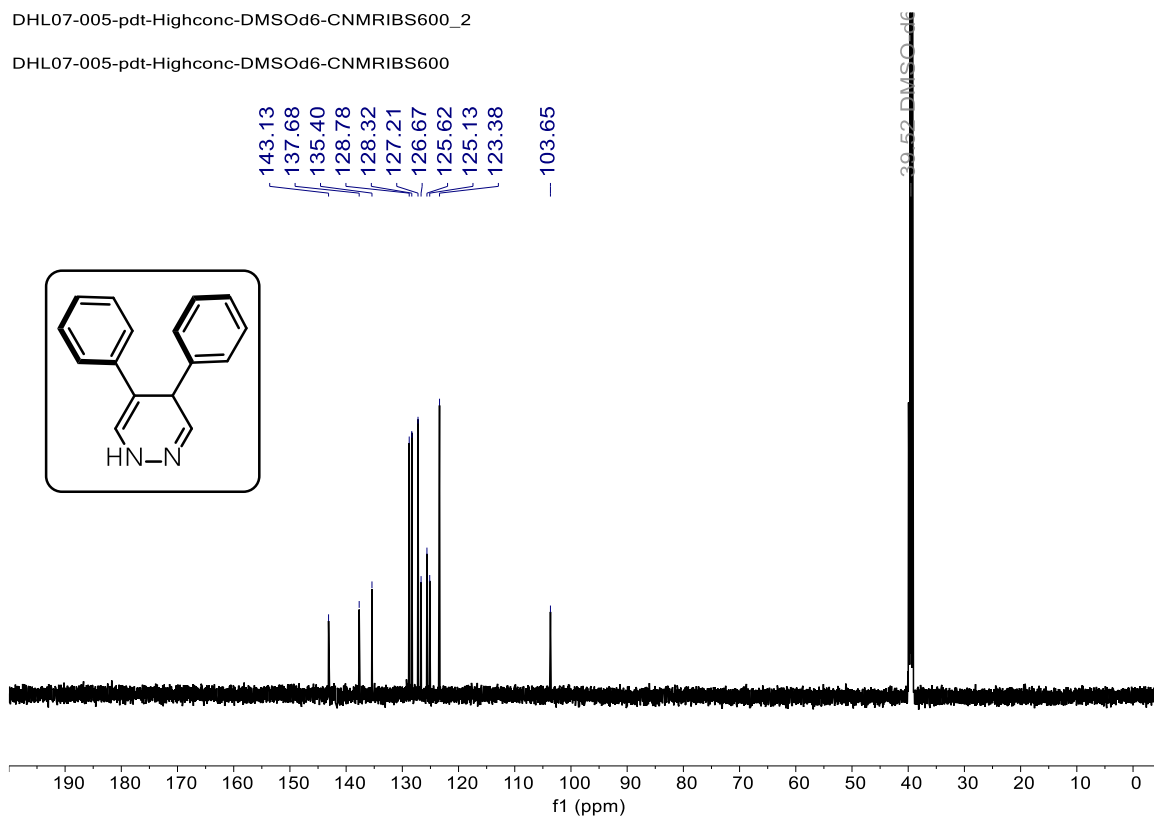

**Figure S113.** <sup>13</sup>C NMR spectrum of **H<sub>2</sub>-4** in DMSO-d<sub>6</sub> at 25 °C.

## VIII. Cartesian Coordinates Obtained in Computational Studies

=====  
**I**  
 # of Negative Frequency: 0  
 Charge: 0 Multiplicity: 1  
 =====

|   |           |           |           |
|---|-----------|-----------|-----------|
| C | 1.088603  | 1.501292  | -0.376096 |
| O | 2.125637  | 1.972918  | 0.020281  |
| H | 1.082044  | 0.785204  | -1.232332 |
| C | -0.276042 | 1.849403  | 0.165256  |
| C | -0.997909 | 3.979360  | -1.086042 |
| C | 0.080040  | 4.694709  | -0.529325 |
| C | -1.973153 | 4.724027  | -1.781712 |
| C | 0.187622  | 6.078257  | -0.678006 |
| C | -1.859905 | 6.102351  | -1.935653 |
| C | -0.776778 | 6.793728  | -1.385690 |
| H | 0.863470  | 4.163376  | 0.013777  |
| H | -2.849451 | 4.220755  | -2.193938 |
| H | 1.038943  | 6.598393  | -0.234160 |
| H | -2.637673 | 6.644372  | -2.477818 |
| H | -0.692998 | 7.875535  | -1.500642 |
| C | -1.095626 | 2.513887  | -0.922116 |
| C | -1.838480 | 1.762236  | -1.779683 |
| H | -2.393502 | 2.232489  | -2.594808 |
| N | -1.970660 | 0.410310  | -1.783787 |
| H | -1.573136 | -0.146017 | -1.032171 |
| H | -0.761280 | 0.913721  | 0.491089  |
| H | -0.159325 | 2.492936  | 1.048344  |
| N | -2.927121 | -0.175195 | -2.609049 |
| H | -3.693323 | -0.548634 | -2.046332 |
| H | -2.508264 | -0.964148 | -3.100137 |

=====  
**I<sub>5</sub>-TS**  
 # of Negative Frequency: 1  
 Charge: 0 Multiplicity: 1  
 =====

|   |           |           |           |
|---|-----------|-----------|-----------|
| C | 1.204534  | -0.360007 | -0.160661 |
| C | 2.069790  | -1.403729 | -0.523306 |
| C | 3.454098  | -1.255796 | -0.425867 |
| C | 4.001442  | -0.057792 | 0.029852  |
| C | 3.151538  | 0.992966  | 0.387144  |
| C | 1.770875  | 0.844854  | 0.291758  |
| C | -0.261353 | -0.539406 | -0.258207 |
| C | -1.157479 | 0.176833  | 0.444174  |
| N | -2.518030 | -0.168808 | 0.279668  |
| C | -2.222446 | -1.164172 | -1.656783 |
| C | -0.851184 | -1.598841 | -1.157425 |
| N | -2.969006 | -1.289674 | 1.011366  |
| H | 1.657789  | -2.351259 | -0.875826 |
| H | 4.105118  | -2.085352 | -0.707665 |
| H | 5.083788  | 0.060740  | 0.103476  |
| H | 3.568231  | 1.939348  | 0.737080  |
| H | 1.124891  | 1.684081  | 0.556180  |
| H | -0.888334 | 0.997975  | 1.115897  |
| H | -2.228330 | -0.164684 | -2.146733 |
| H | -0.211184 | -1.757512 | -2.040895 |
| H | -0.968133 | -2.568860 | -0.648021 |
| H | -3.573888 | -0.973353 | 1.770955  |
| H | -3.566788 | -1.826823 | 0.373598  |
| O | -3.158885 | -1.938445 | -1.792519 |
| H | -3.200284 | 0.601742  | 0.297682  |
| N | -5.545173 | -0.248892 | -0.496443 |
| N | -5.156393 | 1.008089  | 0.041090  |
| H | -6.342365 | -0.147467 | -1.126768 |
| H | -4.775464 | -0.610480 | -1.063734 |
| H | -5.737469 | 1.201684  | 0.855205  |
| H | -5.321133 | 1.771754  | -0.617834 |

=====  
**II<sub>5</sub>**  
 # of Negative Frequency: 0  
 Charge: 0 Multiplicity: 1  
 =====

|   |           |           |           |
|---|-----------|-----------|-----------|
| C | 1.207613  | -0.340314 | -0.154240 |
| C | 2.067075  | -1.290495 | -0.725295 |
| C | 3.451383  | -1.132626 | -0.653968 |
| C | 3.996992  | -0.017393 | -0.019165 |
| C | 3.150146  | 0.941482  | 0.543997  |
| C | 1.769023  | 0.783026  | 0.476156  |
| C | -0.253982 | -0.538487 | -0.220198 |
| C | -1.155777 | 0.080521  | 0.555463  |

|   |           |           |           |
|---|-----------|-----------|-----------|
| N | -2.508031 | -0.317377 | 0.282533  |
| C | -2.387697 | -1.154297 | -1.248248 |
| C | -0.895752 | -1.521797 | -1.163627 |
| N | -3.065341 | -1.216960 | 1.228782  |
| H | 1.649149  | -2.168531 | -1.221089 |
| H | 4.106474  | -1.884405 | -1.097479 |
| H | 5.079719  | 0.109005  | 0.033369  |
| H | 3.570872  | 1.822257  | 1.032185  |
| H | 1.117421  | 1.547096  | 0.904358  |
| H | -0.969060 | 0.802699  | 1.351512  |
| H | -2.517730 | -0.249800 | -1.891964 |
| H | -0.437932 | -1.490435 | -2.163651 |
| H | -0.806790 | -2.553503 | -0.784343 |
| H | -3.910128 | -0.775668 | 1.597442  |
| H | -3.408209 | -1.989239 | 0.629249  |
| O | -3.271211 | -2.068642 | -1.300285 |
| H | -3.187299 | 0.466995  | 0.113356  |
| N | -5.545940 | -0.218239 | -0.435912 |
| N | -4.862388 | 1.025520  | -0.323517 |
| H | -6.335056 | -0.138388 | -1.079052 |
| H | -4.895109 | -0.899281 | -0.844377 |
| H | -5.337399 | 1.599689  | 0.371904  |
| H | -4.876261 | 1.556298  | -1.197462 |

=====  
**II<sub>5</sub>-TS**  
 # of Negative Frequency: 1  
 Charge: 0 Multiplicity: 1  
 =====

|   |           |           |           |
|---|-----------|-----------|-----------|
| C | 1.184628  | -0.288086 | 0.010006  |
| C | 1.904864  | -0.774761 | -1.091617 |
| C | 3.280664  | -0.993965 | -1.006230 |
| C | 3.959835  | -0.737110 | 0.184229  |
| C | 3.252033  | -0.259605 | 1.291636  |
| C | 1.880596  | -0.039488 | 1.206531  |
| C | -0.263742 | -0.052043 | -0.103893 |
| C | -1.020384 | 0.694444  | 0.719054  |
| N | -2.373848 | 0.781124  | 0.285998  |
| C | -2.581437 | -0.458525 | -0.690064 |
| C | -1.125664 | -0.577583 | -1.224157 |
| N | -3.369646 | 0.828725  | 1.292693  |
| H | 1.382598  | -0.973140 | -2.029565 |
| H | 3.823812  | -1.366312 | -1.876830 |
| H | 5.035113  | -0.910478 | 0.252955  |
| H | 3.773088  | -0.064752 | 2.230751  |
| H | 1.335996  | 0.315320  | 2.084049  |
| H | -0.716939 | 1.249182  | 1.609560  |
| H | -2.713323 | -1.279952 | 0.075423  |
| H | -1.049538 | 0.051763  | -2.129081 |
| H | -0.882288 | -1.611443 | -1.510969 |
| H | -3.148565 | 0.128824  | 2.006815  |
| H | -3.313758 | 1.738195  | 1.753781  |
| O | -3.546278 | -0.316900 | -1.544339 |
| N | -4.367859 | 2.335747  | -1.609964 |
| N | -3.014696 | 2.687839  | -1.337118 |
| H | -4.614952 | 2.700933  | -2.530235 |
| H | -4.327046 | 1.299809  | -1.676715 |
| H | -2.616097 | 1.837424  | -0.528908 |
| H | -2.956441 | 3.629123  | -0.942202 |
| H | -2.402786 | 2.657331  | -2.160272 |

=====  
**III<sub>5</sub>**  
 # of Negative Frequency: 0  
 Charge: 0 Multiplicity: 1  
 =====

|   |           |           |           |
|---|-----------|-----------|-----------|
| C | 0.996226  | -0.248971 | 0.004165  |
| C | 1.367381  | -1.584316 | -0.231146 |
| C | 2.686478  | -2.006449 | -0.057970 |
| C | 3.667063  | -1.105677 | 0.354897  |
| C | 3.312530  | 0.226477  | 0.593831  |
| C | 1.998847  | 0.649014  | 0.421322  |
| C | -0.391602 | 0.173676  | -0.185737 |
| C | -0.944002 | 1.379220  | 0.065727  |
| N | -2.324771 | 1.384705  | -0.132385 |
| C | -2.662987 | 0.202224  | -0.926662 |
| C | -1.507650 | -0.755937 | -0.627105 |
| N | -2.997986 | 2.550640  | -0.512976 |
| H | 0.612998  | -2.303455 | -0.555512 |
| H | 2.945367  | -3.049720 | -0.249494 |
| H | 4.698447  | -1.435351 | 0.490288  |
| H | 4.069053  | 0.942635  | 0.920304  |

|   |           |           |           |
|---|-----------|-----------|-----------|
| H | 1.744983  | 1.693456  | 0.613820  |
| H | -0.467330 | 2.289833  | 0.433558  |
| H | -3.648352 | -0.179623 | -0.616316 |
| H | -1.266932 | -1.343714 | -1.524756 |
| H | -1.777087 | -1.460718 | 0.176545  |
| H | -3.210694 | 3.104813  | 0.314767  |
| H | -2.415626 | 3.124568  | -1.126704 |
| O | -2.664469 | 0.500894  | -2.297272 |
| H | -3.357972 | 1.162631  | -2.435364 |

|   |           |           |           |
|---|-----------|-----------|-----------|
| C | 0.088858  | 2.373591  | -0.806971 |
| C | -1.477698 | 4.389990  | -1.062039 |
| C | -0.520855 | 5.240383  | -0.479052 |
| C | -2.568984 | 4.992373  | -1.717358 |
| C | -0.659318 | 6.627794  | -0.526772 |
| C | -2.709419 | 6.377229  | -1.761582 |
| C | -1.756323 | 7.206106  | -1.164800 |
| H | 0.341217  | 4.809931  | 0.033736  |
| H | -3.309907 | 4.369912  | -2.222738 |
| H | 0.097508  | 7.260388  | -0.058583 |
| H | -3.564361 | 6.815005  | -2.280820 |
| H | -1.863878 | 8.291227  | -1.206885 |
| C | -1.314271 | 2.918495  | -0.977527 |
| C | -2.403896 | 2.119926  | -1.032700 |
| H | -3.402286 | 2.548877  | -1.140012 |
| N | -2.424406 | 0.739385  | -0.990311 |
| H | -3.289963 | 0.326076  | -0.651262 |
| H | 0.430825  | 2.397992  | 0.241748  |
| H | 0.791340  | 3.012171  | -1.369534 |
| N | -1.256776 | 0.117770  | -0.553439 |
| H | -1.172587 | -0.835551 | -0.964625 |
| H | -1.167433 | 0.101533  | 0.468260  |
| N | 0.674562  | -2.344797 | -2.171216 |
| N | -0.741200 | -2.200647 | -2.187096 |
| H | 1.030539  | -2.492093 | -3.116462 |
| H | -1.167054 | -3.123231 | -2.108071 |
| H | -1.076394 | -1.807156 | -3.069645 |
| H | 1.067449  | -1.460098 | -1.833089 |

=====  
**III<sub>5</sub>-TS**

# of Negative Frequency: 1  
 Charge: 1 Multiplicity: 1

|   |           |           |           |
|---|-----------|-----------|-----------|
| N | -0.979313 | -0.238682 | -0.933209 |
| H | -0.410962 | -0.183018 | -1.779679 |
| N | -3.403319 | -0.511142 | 3.489089  |
| C | -3.502291 | 0.022991  | 2.280309  |
| O | -3.261166 | -1.507594 | 1.071334  |
| H | -4.481243 | 0.270385  | 1.871526  |
| C | -2.232845 | 0.756365  | 2.006589  |
| C | 0.114829  | 0.577970  | 3.186231  |
| C | 0.801066  | 1.053942  | 2.058112  |
| C | 0.822918  | 0.414533  | 4.389131  |
| C | 2.161361  | 1.355185  | 2.132120  |
| C | 2.180633  | 0.711925  | 4.458299  |
| C | 2.855784  | 1.185387  | 3.329675  |
| H | 0.274195  | 1.167567  | 1.108036  |
| H | 0.299792  | 0.065333  | 5.281685  |
| H | 2.681677  | 1.721057  | 1.245217  |
| H | 2.713621  | 0.582203  | 5.401766  |
| H | 3.919488  | 1.422851  | 3.385399  |
| C | -1.315154 | 0.257273  | 3.100345  |
| C | -2.065447 | -0.465504 | 3.951933  |
| H | -1.821581 | -0.985290 | 4.876033  |
| H | -1.859672 | 0.613243  | 0.982711  |
| H | -2.428277 | 1.837150  | 2.132593  |
| N | -4.386386 | -1.221937 | 4.165045  |
| H | -4.662028 | -2.024591 | 3.596202  |
| H | -5.203721 | -0.623514 | 4.286077  |
| N | -2.295145 | -0.684615 | -1.234133 |
| H | -4.119525 | -1.937476 | 0.937523  |
| H | -0.542900 | -0.944505 | -0.338991 |
| H | -2.948478 | -1.198439 | 0.135200  |
| H | -2.304715 | -1.410682 | -1.955566 |
| H | -2.826030 | 0.103888  | -1.606165 |

=====  
**II<sub>6</sub>**

# of Negative Frequency: 0  
 Charge: 0 Multiplicity: 1

|   |           |           |           |
|---|-----------|-----------|-----------|
| C | 0.156526  | 0.925407  | -1.472311 |
| O | 1.212556  | 0.287734  | -1.094913 |
| H | -0.141756 | 0.863298  | -2.554269 |
| C | 0.044041  | 2.383994  | -1.013835 |
| C | -1.508993 | 4.441423  | -1.075428 |
| C | -0.510234 | 5.243969  | -0.497720 |
| C | -2.635959 | 5.088260  | -1.616193 |
| C | -0.642935 | 6.631686  | -0.437880 |
| C | -2.769089 | 6.472989  | -1.555122 |
| C | -1.774370 | 7.255200  | -0.963008 |
| H | 0.381220  | 4.776256  | -0.076223 |
| H | -3.412875 | 4.504575  | -2.113741 |
| H | 0.146462  | 7.227162  | 0.025048  |
| H | -3.652546 | 6.946716  | -1.987643 |
| H | -1.877723 | 8.340682  | -0.920421 |
| C | -1.348628 | 2.968731  | -1.106647 |
| C | -2.421520 | 2.158040  | -1.198265 |
| H | -3.441724 | 2.540303  | -1.255659 |
| N | -2.358358 | 0.768692  | -1.267701 |
| H | -3.167799 | 0.276648  | -0.896930 |
| H | 0.440416  | 2.427764  | 0.015803  |
| H | 0.738329  | 2.971083  | -1.635948 |
| N | -1.147156 | 0.205100  | -0.836881 |
| H | -1.075854 | -0.805710 | -1.194383 |
| H | -1.033840 | 0.229804  | 0.186881  |
| N | 0.665484  | -2.475669 | -1.769110 |
| N | -0.713750 | -2.240096 | -2.038095 |
| H | 1.121328  | -2.862736 | -2.596033 |
| H | -1.252575 | -3.072796 | -1.801812 |
| H | -0.891152 | -2.052656 | -3.028040 |
| H | 1.077399  | -1.547620 | -1.587580 |

=====  
**IV<sub>5</sub>**

# of Negative Frequency: 0  
 Charge: 0 Multiplicity: 1

|   |           |          |           |
|---|-----------|----------|-----------|
| C | -0.771018 | 4.940702 | 13.741576 |
| H | -0.463933 | 5.951391 | 13.467086 |
| C | -1.915873 | 4.395168 | 13.161088 |
| H | -2.486967 | 4.984252 | 12.440759 |
| C | -2.333491 | 3.107028 | 13.498267 |
| H | -3.230202 | 2.680836 | 13.045463 |
| C | -1.589955 | 2.369821 | 14.422865 |
| H | -1.901494 | 1.359706 | 14.695669 |
| C | -0.445852 | 2.914788 | 15.001492 |
| H | 0.123979  | 2.320769 | 15.718731 |
| C | -0.014149 | 4.211453 | 14.672991 |
| C | 2.000534  | 4.193400 | 16.246181 |
| H | 1.937224  | 3.228699 | 16.745061 |
| C | 1.195438  | 4.790714 | 15.285659 |
| C | 1.773932  | 6.072079 | 15.012576 |
| H | 1.410991  | 6.816883 | 14.308636 |
| C | 2.892110  | 6.199129 | 15.806998 |
| H | 3.620552  | 6.997967 | 15.919684 |
| N | 3.014204  | 5.056229 | 16.545508 |
| N | 4.046189  | 4.846719 | 17.455770 |
| H | 3.639057  | 4.664360 | 18.373778 |
| H | 4.554542  | 4.004439 | 17.183428 |

=====  
**II<sub>6</sub>-TS**

# of Negative Frequency: 1  
 Charge: 0 Multiplicity: 1

|   |           |          |           |
|---|-----------|----------|-----------|
| C | 0.088173  | 0.890806 | -1.501002 |
| O | 1.185034  | 0.267332 | -1.121891 |
| H | -0.154807 | 0.860268 | -2.601250 |
| C | 0.020714  | 2.362570 | -1.056376 |
| C | -1.515874 | 4.438048 | -1.078145 |
| C | -0.488479 | 5.228750 | -0.532659 |
| C | -2.660818 | 5.103855 | -1.558659 |
| C | -0.608238 | 6.616520 | -0.447325 |
| C | -2.781205 | 6.487815 | -1.471647 |
| C | -1.756190 | 7.256388 | -0.912864 |
| H | 0.417225  | 4.749518 | -0.156952 |
| H | -3.464266 | 4.534550 | -2.029849 |
| H | 0.205183  | 7.199446 | -0.010417 |
| H | -3.680428 | 6.972768 | -1.857215 |

=====  
**I<sub>6</sub>-TS**

# of Negative Frequency: 1  
 Charge: 0 Multiplicity: 1

|   |           |          |           |
|---|-----------|----------|-----------|
| C | 0.321620  | 0.969478 | -1.332936 |
| O | 1.318182  | 0.323825 | -0.971101 |
| H | -0.110166 | 0.812348 | -2.351178 |

|   |           |           |           |
|---|-----------|-----------|-----------|
| H | -1.850135 | 8.341724  | -0.849795 |
| C | -1.363959 | 2.968346  | -1.139382 |
| C | -2.435163 | 2.153192  | -1.259500 |
| H | -3.456745 | 2.531105  | -1.331365 |
| N | -2.343024 | 0.775849  | -1.348443 |
| H | -3.168835 | 0.244846  | -1.092527 |
| H | 0.425506  | 2.395711  | -0.028674 |
| H | 0.724407  | 2.938183  | -1.680274 |
| N | -1.144335 | 0.183897  | -0.915842 |
| H | -1.005413 | -1.139306 | -1.421289 |
| H | -1.051094 | 0.248349  | 0.107411  |
| N | 0.682701  | -2.379003 | -1.621794 |
| N | -0.687939 | -2.158934 | -1.951382 |
| H | 1.137436  | -2.806071 | -2.427802 |
| H | -1.272789 | -2.934859 | -1.631103 |
| H | -0.859887 | -2.042706 | -2.956100 |
| H | 1.068168  | -1.410727 | -1.479944 |

=====  
**III<sub>6</sub>**

# of Negative Frequency: 0  
Charge: 0 Multiplicity: 1  
=====

|   |           |           |           |
|---|-----------|-----------|-----------|
| C | 0.028555  | 0.884533  | -1.410265 |
| O | 1.149490  | 0.254217  | -0.876373 |
| H | 0.026022  | 0.865304  | -2.515643 |
| C | 0.009384  | 2.328902  | -0.924422 |
| C | -1.481037 | 4.426604  | -1.092484 |
| C | -0.491165 | 5.191323  | -0.448125 |
| C | -2.574625 | 5.121810  | -1.647943 |
| C | -0.595428 | 6.579518  | -0.347259 |
| C | -2.678917 | 6.505310  | -1.545603 |
| C | -1.690470 | 7.247678  | -0.892428 |
| H | 0.371765  | 4.692348  | -0.004025 |
| H | -3.352174 | 4.576257  | -2.185607 |
| H | 0.189797  | 7.139319  | 0.165109  |
| H | -3.536223 | 7.012118  | -1.993314 |
| H | -1.772510 | 8.333153  | -0.817237 |
| C | -1.347037 | 2.958875  | -1.171993 |
| C | -2.395857 | 2.153767  | -1.471276 |
| H | -3.390124 | 2.543879  | -1.696707 |
| N | -2.290315 | 0.787703  | -1.562841 |
| H | -3.131371 | 0.225274  | -1.580288 |
| H | 0.275584  | 2.326026  | 0.147650  |
| H | 0.798762  | 2.898256  | -1.441397 |
| N | -1.174135 | 0.161848  | -0.995111 |
| H | -1.229027 | 0.241398  | 0.028098  |
| H | 1.172205  | -0.647860 | -1.224635 |

=====  
**III<sub>6</sub>-TS**

# of Negative Frequency: 1  
Charge: 1 Multiplicity: 1  
=====

|   |           |           |           |
|---|-----------|-----------|-----------|
| C | -0.336230 | 0.690375  | -1.137368 |
| O | 0.199395  | 0.897151  | -2.901675 |
| H | 0.507037  | 0.036767  | -0.907554 |
| C | -0.265819 | 2.123687  | -0.696591 |
| C | -1.521240 | 4.331616  | -1.112860 |
| C | -0.527544 | 5.038078  | -0.413653 |
| C | -2.491375 | 5.076659  | -1.809392 |
| C | -0.516282 | 6.433539  | -0.392918 |
| C | -2.482296 | 6.468160  | -1.782865 |
| C | -1.494538 | 7.156804  | -1.073238 |
| H | 0.245686  | 4.495645  | 0.133290  |
| H | -3.254778 | 4.562650  | -2.396371 |
| H | 0.266849  | 6.956320  | 0.159524  |
| H | -3.247770 | 7.020260  | -2.331559 |
| H | -1.484366 | 8.247892  | -1.059693 |
| C | -1.527178 | 2.855865  | -1.098979 |
| C | -2.635083 | 2.136216  | -1.377979 |
| H | -3.601025 | 2.599472  | -1.584979 |
| N | -2.669423 | 0.756644  | -1.462599 |
| H | -3.493728 | 0.313082  | -1.062700 |
| H | -0.120092 | 2.130326  | 0.397808  |
| H | 0.632752  | 2.583147  | -1.131693 |
| N | -1.505983 | 0.067546  | -1.115282 |
| H | -1.499873 | -0.916190 | -1.461546 |
| N | -0.936442 | -1.257839 | -3.862302 |
| N | -0.978297 | -2.156705 | -2.757933 |
| H | -0.191455 | 0.061729  | -3.386878 |
| H | -0.589323 | -1.709578 | -4.712854 |
| H | -0.016208 | -2.409871 | -2.528478 |
| H | -1.454529 | -3.025065 | -3.010183 |
| H | -1.893600 | -0.959317 | -4.060371 |

|   |           |          |           |
|---|-----------|----------|-----------|
| H | -0.262209 | 1.665239 | -3.280157 |
|---|-----------|----------|-----------|

=====  
**IV<sub>6</sub>**

# of Negative Frequency: 0  
Charge: 0 Multiplicity: 1  
=====

|   |           |          |           |
|---|-----------|----------|-----------|
| N | 1.802637  | 5.749194 | 15.797669 |
| C | 2.716556  | 6.274220 | 16.521210 |
| C | 2.619416  | 6.526280 | 18.005596 |
| C | 1.595777  | 5.585393 | 18.604918 |
| N | 0.672308  | 5.331489 | 16.421524 |
| H | 3.625207  | 6.575148 | 15.990539 |
| C | 1.619791  | 5.304177 | 20.051437 |
| C | 0.947391  | 4.201007 | 20.612791 |
| C | 2.327630  | 6.152058 | 20.921066 |
| C | 0.963903  | 3.973415 | 21.985364 |
| C | 2.349058  | 5.918821 | 22.297285 |
| C | 1.665227  | 4.831499 | 22.838150 |
| H | 0.418740  | 3.499865 | 19.964048 |
| H | 2.860472  | 7.016336 | 20.520974 |
| H | 0.436176  | 3.109593 | 22.394333 |
| H | 2.906786  | 6.594622 | 22.948520 |
| H | 1.683382  | 4.646208 | 23.913428 |
| C | 0.651287  | 5.086872 | 17.778014 |
| H | 0.048576  | 4.803164 | 15.823662 |
| H | -0.181875 | 4.468469 | 18.114833 |
| H | 3.611331  | 6.381920 | 18.462698 |
| H | 2.359340  | 7.587169 | 18.191113 |

=====  
**S1**

# of Negative Frequency: 0  
Charge: 1 Multiplicity: 2  
=====

|   |           |           |          |
|---|-----------|-----------|----------|
| O | -3.070026 | -0.475960 | 3.325579 |
| C | -3.181439 | 0.328149  | 2.215464 |
| H | -4.163506 | 0.357206  | 1.750787 |
| C | -1.998925 | 0.930864  | 1.938332 |
| C | 0.297744  | 0.808085  | 3.124146 |
| C | 0.947813  | 1.686889  | 2.216017 |
| C | 1.034144  | 0.264440  | 4.213438 |
| C | 2.279732  | 2.005959  | 2.393338 |
| C | 2.366393  | 0.593016  | 4.381516 |
| C | 2.991531  | 1.461129  | 3.475155 |
| H | 0.391463  | 2.108411  | 1.378334 |
| H | 0.554427  | -0.411672 | 4.921581 |
| H | 2.777767  | 2.679937  | 1.696047 |
| H | 2.929170  | 0.176223  | 5.216785 |
| H | 4.043651  | 1.716138  | 3.612181 |
| C | -1.078869 | 0.482546  | 2.939315 |
| C | -1.841399 | -0.397768 | 3.763609 |
| H | -1.581670 | -0.984399 | 4.643445 |
| H | -1.809612 | 1.618242  | 1.118742 |

=====  
**S2**

# of Negative Frequency: 0  
Charge: 1 Multiplicity: 2  
=====

|   |           |           |          |
|---|-----------|-----------|----------|
| O | -3.028893 | -0.642468 | 3.253779 |
| C | -3.100881 | 0.195290  | 2.178950 |
| H | -4.062910 | 0.243784  | 1.675500 |
| C | -1.915673 | 0.849381  | 1.960151 |
| C | 0.367599  | 0.838209  | 3.167666 |
| C | 1.051011  | 1.619088  | 2.209328 |
| C | 1.059401  | 0.464015  | 4.340607 |
| C | 2.370655  | 1.999913  | 2.415910 |
| C | 2.381684  | 0.849864  | 4.540164 |
| C | 3.045000  | 1.616844  | 3.580486 |
| H | 0.539812  | 1.915085  | 1.291740 |
| H | 0.554911  | -0.111382 | 5.120652 |
| H | 2.883163  | 2.596319  | 1.659163 |
| H | 2.896853  | 0.553284  | 5.455254 |
| H | 4.082435  | 1.915207  | 3.738571 |
| C | -1.000325 | 0.432891  | 2.944534 |
| C | -1.725606 | -0.599984 | 3.756617 |
| H | -1.746632 | 1.584136  | 1.176240 |
| N | -1.147643 | -2.003220 | 3.542001 |
| H | -0.190381 | -2.031829 | 3.925495 |
| N | -1.115740 | -2.489932 | 2.213666 |
| H | -0.570573 | -1.830694 | 1.653380 |
| H | -2.075967 | -2.486669 | 1.863900 |
| H | -1.684881 | -2.669504 | 4.117747 |

H -1.727871 -0.466949 4.849413

**S3**

# of Negative Frequency: 0  
Charge: 0 Multiplicity: 2

O -3.208150 -0.578222 3.213470  
C -3.232575 0.277018 2.178147  
H -4.185716 0.386201 1.663988  
C -2.021107 0.884308 1.951041  
C 0.266114 0.747553 3.110054  
C 0.942702 1.597024 2.201598  
C 0.999554 0.250328 4.212510  
C 2.279107 1.926303 2.387642  
C 2.338353 0.586309 4.392676  
C 2.989736 1.422909 3.483538  
H 0.406767 1.994906 1.338019  
H 0.512942 -0.395906 4.944645  
H 2.775336 2.582211 1.669606  
H 2.878355 0.191273 5.255329  
H 4.039878 1.681626 3.627370  
C -1.118928 0.404255 2.916504  
C -1.870931 -0.607576 3.766791  
H -1.829808 1.610889 1.164231  
N -1.407861 -1.965099 3.759915  
H -0.769516 -2.161647 4.524370  
N -0.919315 -2.476939 2.547313  
H -0.337121 -1.784672 2.065175  
H -1.714312 -2.661465 1.936152  
H -1.935720 -0.301537 4.826028

**SIII<sub>5</sub>-TS**

# of Negative Frequency: 1  
Charge: 0 Multiplicity: 1

N -0.259085 0.038547 -2.386578  
H -0.574737 0.653334 -3.143792  
N -2.186557 -0.780655 1.039677  
C -2.415207 0.317777 0.211505  
O -2.899625 -0.483283 -1.289944  
H -3.372837 0.837323 0.338595  
C -1.157875 1.008326 0.136850  
C 1.272465 0.425195 0.880259  
C 1.847288 1.471956 0.136236  
C 2.127871 -0.346063 1.692440  
C 3.217767 1.730665 0.193260  
C 3.494612 -0.090886 1.744386  
C 4.051328 0.950979 0.994574  
H 1.207222 2.087657 -0.499798  
H 1.706220 -1.149291 2.300593  
H 3.636657 2.549728 -0.395218  
H 4.132971 -0.706546 2.381492  
H 5.122765 1.153271 1.039918  
C -0.168609 0.163473 0.803540  
C -0.824338 -0.943423 1.273887  
H -0.463116 -1.858839 1.737525  
H -0.665769 0.429154 -1.433861  
H -1.078487 2.089158 0.018725  
N -3.106771 -1.812768 1.193878  
H -3.506516 -1.965168 0.263657  
H -3.873054 -1.478018 1.780997  
N -0.677167 -1.303805 -2.658707  
H -3.561693 0.088563 -1.702229  
H 0.763887 0.104439 -2.362735  
H -1.645770 -1.293497 -2.278384  
H -0.143839 -1.887304 -2.010747

**II<sub>5</sub>'**

# of Negative Frequency: 0  
Charge: 0 Multiplicity: 1

C -1.637007 2.360117 -1.241776  
C -0.316053 2.548112 -1.674543  
C 0.166691 3.826955 -1.953618  
C -0.666915 4.935909 -1.813571  
C -1.988383 4.759650 -1.393469  
C -2.469752 3.484515 -1.111682  
C -2.121113 1.000891 -0.928850  
C -3.208469 0.714153 -0.198448  
N -3.431699 -0.695366 -0.041290  
C -2.380585 -1.412440 -1.241034

C -1.392494 -0.240178 -1.373381  
N -3.064248 -1.217255 1.226704  
H 0.344844 1.686287 -1.783593  
H 1.198976 3.957075 -2.282963  
H -0.291351 5.936239 -2.035681  
H -2.649169 5.622402 -1.292888  
H -3.508446 3.356864 -0.800969  
H -3.891684 1.413574 0.285433  
H -3.116710 -1.382607 -2.081639  
H -1.035066 -0.157849 -2.410702  
H -0.519194 -0.440659 -0.730430  
H -2.835133 -0.419279 1.822569  
H -3.965823 -1.572888 1.592860  
O -1.978276 -2.546379 -0.826765  
H -4.397302 -1.032778 -0.284508

**II<sub>6</sub>'**

# of Negative Frequency: 0  
Charge: 0 Multiplicity: 1

C 0.156526 0.925407 -1.472311  
O 1.212556 0.287734 -1.094913  
H -0.141756 0.863298 -2.554269  
C 0.044041 2.383994 -1.013835  
C -1.508993 4.441423 -1.075428  
C -0.510234 5.243969 -0.497720  
C -2.635959 5.088260 -1.616193  
C -0.642935 6.631686 -0.437880  
C -2.769089 6.472989 -1.555122  
C -1.774370 7.255200 -0.963008  
H 0.381220 4.776256 -0.076223  
H -3.412875 4.504575 -2.113741  
H 0.146462 7.227162 0.025048  
H -3.652546 6.946716 -1.987643  
H -1.877723 8.340682 -0.920421  
C -1.348628 2.968731 -1.106647  
C -2.421520 2.158040 -1.198265  
H -3.441724 2.540303 -1.255659  
N -2.358358 0.768692 -1.267701  
H -3.167799 0.276648 -0.896930  
H 0.440416 2.427764 0.015803  
H 0.738329 2.971083 -1.635948  
N -1.147156 0.205100 -0.836881  
H -1.075854 -0.805710 -1.194383  
H -1.033840 0.229804 0.186881

**II<sub>5</sub>''**

# of Negative Frequency: 0  
Charge: 1 Multiplicity: 1

C -0.140872 -1.238280 -1.190989  
C 0.460760 -2.342865 -1.810177  
C 0.602104 -2.384818 -3.197067  
C 0.136216 -1.328777 -3.979031  
C -0.472022 -0.226689 -3.370423  
C -0.610008 -0.180204 -1.987238  
C -0.256875 -1.197321 0.274973  
C -0.580751 -0.130073 1.015734  
N -0.504105 -0.443529 2.443413  
C -0.640890 -1.991285 2.469428  
C 0.026673 -2.383946 1.162210  
N 0.769221 -0.064198 2.978786  
H 0.830957 -3.173231 -1.206328  
H 1.078333 -3.246324 -3.667382  
H 0.243631 -1.363029 -5.064452  
H -0.841571 0.599766 -3.979404  
H -1.095603 0.679663 -1.522225  
H -0.804148 0.898750 0.740731  
H -1.727765 -2.147999 2.421562  
H -0.393702 -3.321518 0.776643  
H 1.109155 -2.519792 1.313494  
H 0.788111 0.957771 2.987143  
H 0.772564 -0.374971 3.953300  
O -0.060409 -2.518901 3.578646  
H -1.280821 -0.013782 2.967320  
H -0.703783 -2.577291 4.300800

**II<sub>6</sub>''**

# of Negative Frequency: 0  
Charge: 1 Multiplicity: 1

|   |           |           |           |
|---|-----------|-----------|-----------|
| C | -0.388655 | -0.502598 | -5.499736 |
| O | 0.337728  | 0.038082  | -6.521781 |
| H | -1.477594 | -0.445394 | -5.642481 |
| C | 0.047242  | 0.071686  | -4.171001 |
| C | -0.414574 | -0.165191 | -1.653454 |
| C | 0.410443  | 0.937368  | -1.379942 |
| C | -1.232086 | -0.653974 | -0.619504 |
| C | 0.435102  | 1.517148  | -0.111133 |
| C | -1.205539 | -0.075683 | 0.646659  |
| C | -0.369567 | 1.012226  | 0.909285  |
| H | 1.053067  | 1.346210  | -2.161625 |
| H | -1.918045 | -1.481428 | -0.809521 |
| H | 1.089563  | 2.369852  | 0.078645  |
| H | -1.854958 | -0.469633 | 1.430515  |
| H | -0.352935 | 1.467901  | 1.900629  |
| C | -0.416552 | -0.772152 | -3.005438 |
| C | -0.812919 | -2.039392 | -3.212215 |
| H | -1.150470 | -2.699402 | -2.412936 |
| N | -0.890748 | -2.643827 | -4.475554 |
| H | -0.720556 | -3.648600 | -4.483146 |
| H | 1.144706  | 0.179871  | -4.187931 |
| H | -0.371279 | 1.086196  | -4.101013 |
| N | -0.108323 | -2.008778 | -5.464501 |
| H | -0.344269 | -2.412629 | -6.382217 |
| H | 0.908574  | -2.149367 | -5.326227 |
| H | -0.142729 | -0.041930 | -7.359313 |

=====  
**N<sub>2</sub>H<sub>4</sub>**

# of Negative Frequency: 0  
 Charge: 0 Multiplicity: 1  
 =====

|   |           |           |           |
|---|-----------|-----------|-----------|
| N | -0.493919 | -0.006566 | -2.470281 |
| N | -1.065163 | 0.007358  | -1.167295 |
| H | -1.037832 | 0.967873  | -0.829107 |
| H | -2.054850 | -0.246031 | -1.193715 |
| H | -1.184448 | 0.243685  | -3.180824 |
| H | -0.222748 | -0.966316 | -2.677606 |

=====  
**N<sub>2</sub>H<sub>5</sub><sup>+</sup>**

# of Negative Frequency: 0  
 Charge: 1 Multiplicity: 1  
 =====

|   |          |          |           |
|---|----------|----------|-----------|
| H | 2.380200 | 0.362037 | -2.469067 |
| H | 2.593318 | 2.008454 | -2.368996 |
| N | 0.921229 | 1.366474 | -3.434802 |
| N | 2.263702 | 1.246407 | -2.981237 |
| H | 2.899515 | 1.198827 | -3.788294 |
| H | 0.853040 | 2.265132 | -3.915761 |
| H | 0.335296 | 1.438407 | -2.601468 |

=====  
**H<sub>2</sub>O**

# of Negative Frequency: 0  
 Charge: 0 Multiplicity: 1  
 =====

|   |           |           |           |
|---|-----------|-----------|-----------|
| O | -0.702729 | 0.000000  | -1.258583 |
| H | -0.702729 | 0.752991  | -0.654406 |
| H | -0.702729 | -0.752991 | -0.654406 |

# IX. Vibrational Frequencies Obtained in Computational Studies

## I

# of Negative Frequency: 0  
Charge: 0 Multiplicity: 1

45.44 60.10 79.69 90.40 117.64 124.82 202.43 255.60  
267.88 333.18 355.07 381.33 423.50 457.40 475.86  
522.50 554.60 604.25 630.13 639.67 725.99 769.87  
792.62 875.69 882.03 948.12 950.15 979.02 991.37  
1005.79 1023.97 1041.88 1051.24 1071.76 1092.07 1116.06  
1152.65 1163.76 1192.83 1200.15 1269.63 1307.33 1315.68  
1328.86 1355.28 1363.00 1373.52 1417.29 1445.25 1482.93  
1515.97 1546.94 1647.45 1660.04 1686.52 1734.97 1864.68  
2960.26 3071.18 3148.45 3209.07 3214.39 3223.43 3230.19  
3232.55 3236.33 3497.02 3579.34 3587.99

## I<sub>5</sub>-TS

# of Negative Frequency: 1  
Charge: 0 Multiplicity: 1

-121.38 39.84 49.69 60.14 80.04 102.56 131.61 138.05  
158.73 188.48 211.35 211.96 235.19 283.43 306.51  
333.71 388.13 420.38 427.14 447.07 470.66 536.52  
567.81 595.91 628.85 681.13 727.04 794.43 828.95  
854.50 883.63 890.16 897.41 903.25 967.36 1000.72  
1010.46 1019.87 1028.31 1038.61 1049.24 1057.00 1062.17  
1071.53 1076.20 1108.85 1148.08 1152.20 1187.76 1194.69  
1251.20 1265.81 1308.61 1314.00 1334.41 1343.60 1353.54  
1361.27 1378.03 1397.74 1416.71 1485.01 1517.96 1543.71  
1639.45 1644.84 1663.46 1664.75 1693.63 1735.38 1787.64  
2979.41 3066.08 3127.00 3190.35 3213.41 3218.43 3226.32  
3230.09 3237.90 3383.23 3461.47 3480.94 3489.44 3547.54  
3562.03 3586.34 -117.22 37.15 50.10 62.25 76.02 95.06  
129.64 137.47 150.29 185.22 211.74 213.08 247.91  
287.87 308.13 349.77 392.14 419.96 431.77 460.59  
471.80 537.43 570.49 598.29 628.75 681.05 726.93  
794.91 842.05 859.10 883.56 891.16 900.42 917.66  
968.76 1002.51 1011.57 1025.51 1029.13 1041.00 1050.08  
1061.34 1064.25 1076.33 1082.25 1108.32 1146.87 1152.28  
1187.14 1192.94 1248.15 1262.33 1308.04 1310.57 1332.23  
1347.26 1354.05 1360.52 1376.90 1394.86 1416.85 1485.13  
1517.13 1543.53 1634.59 1640.93 1663.66 1669.79 1693.91  
1736.45 1765.01 2976.08 3065.86 3125.76 3193.44 3213.54  
3218.37 3226.03 3229.99 3238.02 3356.96 3449.72 3478.90  
3490.11 3548.20 3559.69 3586.28

## II<sub>5</sub>

# of Negative Frequency: 0  
Charge: 0 Multiplicity: 1

30.38 41.34 75.63 77.79 92.30 109.36 145.64 170.14  
198.65 205.75 258.19 299.35 309.80 326.43 373.78  
391.63 417.54 423.22 492.08 513.79 534.17 570.70  
583.95 627.80 668.41 692.58 722.19 794.96 857.95  
877.82 885.44 927.78 938.13 969.78 1003.54 1011.96  
1027.46 1037.52 1046.58 1051.28 1061.94 1068.57 1077.81  
1104.94 1143.49 1151.04 1164.16 1182.27 1210.27 1246.40  
1263.56 1295.70 1300.17 1311.53 1323.72 1349.28 1361.26  
1379.30 1381.43 1393.86 1425.83 1486.14 1519.31 1542.57  
1568.05 1635.57 1643.05 1666.19 1688.59 1694.24 1741.72  
2891.43 2982.99 3068.43 3134.36 3216.02 3221.51 3227.48  
3232.84 3239.59 3247.30 3304.78 3417.82 3487.55 3535.43  
3537.86 3580.46

## II<sub>5</sub>-TS

# of Negative Frequency: 1  
Charge: 0 Multiplicity: 1

-804.33 40.48 46.98 76.35 96.37 114.31 139.27 155.26  
210.46 230.93 249.70 284.73 319.81 340.74 371.98  
390.71 420.34 458.48 500.00 541.68 546.93 567.50  
589.94 627.39 636.48 645.62 719.83 742.47 794.61  
847.81 874.70 895.22 960.99 962.75 976.45 997.71  
1010.93 1021.55 1031.84 1044.49 1047.41 1063.23 1104.16  
1116.42 1144.11 1149.56 1151.37 1171.50 1183.78 1198.18  
1236.28 1274.97 1293.16 1311.84 1335.18 1346.90 1363.82  
1368.41 1390.65 1420.78 1433.95 1468.67 1486.96 1543.03  
1610.27 1621.92 1625.80 1665.98 1677.09 1695.00 1711.52

1737.83 2750.25 3052.90 3126.53 3213.45 3218.38 3225.19  
3230.30 3237.34 3238.15 3277.45 3468.55 3475.59 3543.68  
3563.86 3565.95 -717.14 31.23 44.49 62.19 89.98 112.95  
140.68 156.04 210.43 229.37 255.52 294.13 321.57  
345.62 374.87 406.33 420.93 460.92 510.13 542.94  
549.37 574.30 603.79 622.02 628.22 653.68 721.63  
766.99 794.34 845.82 875.41 901.95 960.74 963.11  
985.16 1010.57 1015.35 1021.63 1031.03 1043.91 1046.76  
1062.82 1103.30 1128.50 1143.17 1149.02 1150.49 1180.57  
1183.51 1199.90 1235.53 1275.88 1291.11 1312.62 1336.64  
1343.90 1363.32 1366.07 1386.13 1425.66 1435.79 1462.84  
1486.89 1542.57 1603.32 1625.09 1644.84 1664.96 1676.96  
1694.46 1715.09 1735.08 2735.53 3047.01 3122.77 3199.93  
3212.38 3217.21 3224.27 3229.22 3233.75 3237.45 3459.39  
3468.74 3545.98 3556.27 3564.37

## III<sub>5</sub>

# of Negative Frequency: 0  
Charge: 0 Multiplicity: 1

33.33 71.59 124.27 148.21 182.61 234.45 268.84 303.85  
356.81 398.78 414.04 419.76 442.73 503.12 546.94  
600.46 627.94 662.30 705.57 718.84 790.95 869.81  
870.31 896.33 909.56 927.96 952.38 964.92 1007.28  
1007.73 1019.61 1027.53 1041.60 1062.74 1097.95 1106.30  
1148.92 1183.98 1186.64 1213.43 1227.79 1266.04 1277.91  
1311.42 1319.49 1332.17 1359.53 1379.02 1409.58 1427.97  
1452.40 1488.77 1543.80 1633.69 1658.98 1692.25 1712.08  
3071.35 3088.71 3136.24 3209.70 3214.60 3222.92 3227.37  
3235.37 3242.43 3488.11 3587.25 3813.16

## III<sub>5</sub>-TS

# of Negative Frequency: 1  
Charge: 1 Multiplicity: 1

-760.90 23.01 39.19 59.89 112.81 149.60 160.30 201.35  
214.02 241.36 255.49 326.98 348.81 366.32 385.71  
421.09 441.53 486.12 510.74 525.71 548.03 572.25  
601.62 627.11 660.27 684.77 714.66 724.32 747.86  
790.44 842.24 877.83 903.11 940.73 949.32 957.81  
975.67 1007.75 1021.85 1023.17 1040.36 1043.35 1062.10  
1088.30 1101.92 1136.16 1148.63 1182.53 1186.05 1198.58  
1225.11 1247.12 1268.10 1288.75 1309.00 1320.55 1326.65  
1348.36 1353.16 1357.34 1403.76 1456.96 1473.92 1494.84  
1541.47 1563.48 1631.64 1639.91 1645.46 1654.81 1671.49  
1687.74 1689.50 1761.30 1866.28 3050.41 3122.23 3137.47  
3149.15 3204.27 3207.87 3218.24 3220.88 3232.67 3253.90  
3406.38 3459.42 3525.62 3546.17 3723.74 -244.42 33.22  
43.44 46.39 70.61 94.80 123.18 130.39 143.74 157.56  
210.14 230.58 250.22 305.52 326.35 367.91 379.58  
415.04 420.32 488.40 497.80 516.17 541.60 572.04  
625.78 659.37 697.47 723.15 745.89 789.40 874.23  
878.93 883.37 902.58 941.53 945.83 968.02 992.80  
1009.94 1015.82 1026.25 1036.05 1049.98 1059.48 1065.96  
1071.70 1106.15 1142.87 1149.00 1150.97 1162.13 1190.04  
1222.57 1270.77 1302.67 1307.65 1321.73 1340.24 1362.48  
1371.59 1376.66 1381.97 1412.99 1485.81 1541.99 1572.67  
1633.92 1635.15 1644.61 1661.86 1666.17 1693.97 1722.13  
2560.95 3067.32 3146.46 3212.57 3216.56 3224.03 3230.70  
3238.48 3279.05 3290.73 3483.90 3499.26 3502.78 3572.12  
3584.05 3594.66 3832.85

## IV<sub>5</sub>

# of Negative Frequency: 0  
Charge: 0 Multiplicity: 1

12.75 98.39 139.19 205.85 231.39 319.93 323.06 369.75  
415.61 490.90 523.62 626.44 628.24 666.15 672.66  
718.24 727.60 741.51 788.43 847.01 868.92 902.58  
935.48 954.86 973.54 1010.38 1017.20 1027.13 1039.74  
1059.64 1069.07 1085.75 1105.26 1148.66 1183.43 1214.73  
1264.21 1314.48 1345.57 1358.11 1420.40 1429.96 1457.94  
1495.36 1539.33 1570.10 1619.22 1657.17 1669.31 1695.74  
3209.83 3214.97 3222.73 3226.91 3234.48 3273.64 3280.92  
3298.72 3504.25 3585.22

## I<sub>6</sub>-TS

# of Negative Frequency: 1  
 Charge: 0 Multiplicity: 1  
 =====  
 -149.62 7.70 43.70 56.74 73.05 98.59 123.29 152.39  
 171.76 185.68 228.23 271.85 295.00 312.82 387.27  
 397.64 422.04 426.92 483.11 495.99 508.52 542.72  
 559.46 616.71 628.79 724.11 727.78 773.11 791.28  
 874.80 891.43 923.80 931.17 938.06 960.55 1003.64  
 1018.08 1022.07 1042.26 1063.77 1067.47 1076.21 1088.81  
 1108.20 1148.23 1150.16 1161.29 1184.38 1188.24 1228.28  
 1261.64 1292.98 1312.12 1320.33 1333.15 1356.55 1363.21  
 1382.51 1389.55 1401.43 1419.82 1483.12 1519.78 1539.87  
 1636.28 1651.60 1654.72 1662.79 1685.23 1688.08 1748.50  
 2913.49 3051.58 3085.96 3102.61 3209.62 3215.06 3223.42  
 3227.33 3234.99 3236.32 3424.51 3477.60 3481.15 3537.06  
 3571.98 3574.39 -140.78 28.38 47.31 67.95 83.33 100.67  
 122.08 152.91 175.55 185.01 230.77 277.05 294.05  
 312.26 385.78 395.05 421.17 425.69 481.51 496.25  
 505.32 541.33 559.23 615.66 628.73 724.29 724.93  
 764.18 791.71 875.53 888.71 924.21 929.64 941.91  
 961.72 1003.39 1017.30 1022.63 1043.20 1063.67 1068.36  
 1077.14 1090.25 1108.09 1148.20 1148.55 1151.29 1179.93  
 1187.77 1226.09 1262.14 1293.43 1312.93 1320.40 1333.29  
 1355.89 1363.12 1382.87 1387.56 1402.16 1419.71 1483.15  
 1518.94 1539.48 1637.29 1650.75 1659.53 1662.49 1684.51  
 1687.52 1748.20 2916.17 3051.93 3102.86 3122.27 3210.04  
 3215.37 3223.57 3227.54 3234.46 3236.23 3426.52 3479.44  
 3484.04 3542.31 3572.07 3575.22

=====  
**II<sub>6</sub>**  
 # of Negative Frequency: 0  
 Charge: 0 Multiplicity: 1  
 =====  
 31.38 49.39 74.46 84.78 104.89 140.08 172.88 186.14  
 196.61 267.56 283.71 324.80 342.80 380.56 404.71  
 419.89 452.09 466.05 505.71 515.02 542.92 560.87  
 585.12 628.65 662.51 722.75 772.00 794.55 874.67  
 907.40 921.93 941.16 949.57 961.86 973.89 1007.84  
 1022.13 1039.13 1043.34 1059.02 1067.80 1091.93 1100.04  
 1107.96 1149.39 1153.55 1186.23 1199.52 1244.76 1274.11  
 1303.33 1310.78 1316.08 1326.21 1335.25 1352.05 1360.36  
 1388.77 1411.45 1428.57 1452.20 1483.75 1499.75 1538.25  
 1542.20 1628.84 1654.82 1664.01 1687.07 1690.61 1752.51  
 2596.84 2819.21 3051.13 3111.06 3210.30 3215.85 3223.73  
 3228.57 3236.15 3244.36 3315.59 3426.15 3483.24 3538.04  
 3573.53 3586.25

=====  
**II<sub>6</sub>-TS**  
 # of Negative Frequency: 1  
 Charge: 0 Multiplicity: 1  
 =====  
 -578.43 22.12 44.87 76.42 93.90 108.30 161.68 177.32  
 211.86 214.95 294.46 334.35 368.69 417.20 419.59  
 437.34 453.75 465.55 508.25 539.89 547.32 554.75  
 575.06 628.70 653.22 704.72 722.96 789.46 827.67  
 875.24 924.48 933.01 957.49 973.32 998.11 1010.81  
 1018.42 1022.04 1042.40 1061.27 1067.32 1071.57 1106.15  
 1115.76 1137.45 1149.23 1186.02 1188.66 1212.82 1245.74  
 1274.45 1283.40 1293.93 1314.70 1337.54 1340.64 1360.82  
 1383.78 1392.95 1426.86 1437.79 1464.13 1484.07 1512.50  
 1541.08 1611.18 1660.31 1675.13 1688.11 1693.10 1723.95  
 1744.43 2777.39 3038.89 3040.97 3098.52 3209.39 3214.83  
 3223.09 3228.57 3235.49 3237.61 3413.82 3470.94 3552.08  
 3562.45 3609.66 -415.58 29.62 44.01 79.40 96.48 109.36  
 164.01 177.84 213.83 216.00 301.53 335.10 372.91  
 418.12 424.09 437.93 453.15 458.95 511.50 537.64  
 547.28 565.80 579.03 628.66 705.71 722.51 745.63  
 790.86 850.00 874.22 925.94 933.19 957.87 977.64  
 1000.79 1012.26 1021.28 1029.49 1041.47 1061.65 1068.26  
 1075.02 1106.23 1113.31 1140.36 1149.18 1186.70 1197.88  
 1215.61 1246.23 1274.56 1278.99 1294.51 1314.55 1336.95  
 1342.32 1361.16 1383.43 1396.79 1424.56 1436.39 1479.76  
 1484.63 1512.75 1541.09 1606.92 1659.90 1676.13 1687.36  
 1694.14 1720.59 1737.89 2772.15 2941.09 3038.33 3095.71  
 3209.17 3214.63 3222.97 3228.55 3235.02 3236.66 3413.58  
 3468.19 3547.30 3564.33 3617.35

=====  
**III<sub>6</sub>**  
 # of Negative Frequency: 0  
 Charge: 0 Multiplicity: 1  
 =====

40.98 77.15 132.74 164.61 213.87 234.00 293.43 333.70  
 359.00 389.19 418.25 460.93 484.75 515.94 553.73  
 568.30 587.69 628.78 715.91 721.45 792.15 869.12  
 875.21 931.69 939.53 958.63 964.45 1003.69 1018.49  
 1020.05 1041.71 1046.29 1064.88 1099.58 1109.51 1124.97  
 1151.00 1184.88 1192.26 1223.75 1264.65 1272.93 1305.74  
 1316.46 1346.53 1362.37 1366.70 1387.85 1434.87 1456.95  
 1468.27 1486.03 1518.64 1543.02 1657.86 1685.82 1721.83  
 3042.27 3049.50 3104.62 3208.87 3213.93 3223.48 3227.98  
 3235.30 3239.57 3420.80 3653.66 3837.58

=====  
**III<sub>6</sub>-TS**  
 # of Negative Frequency: 1  
 Charge: 1 Multiplicity: 1  
 =====  
 -315.33 23.90 39.21 49.50 79.46 126.69 133.67 163.37  
 179.02 204.61 282.29 295.42 313.48 339.32 390.78  
 407.98 421.15 450.84 469.80 483.70 537.73 558.89  
 569.64 603.62 626.54 656.34 722.71 741.23 792.64  
 816.09 875.08 886.86 922.15 951.39 958.79 972.57  
 991.63 1006.98 1012.71 1023.55 1033.12 1046.04 1060.53  
 1074.32 1086.29 1111.22 1139.07 1151.25 1154.48 1192.07  
 1209.82 1221.99 1246.63 1293.25 1305.92 1324.28 1340.87  
 1351.59 1364.97 1397.41 1411.42 1439.37 1483.54 1512.51  
 1543.80 1560.75 1627.56 1634.38 1655.90 1660.41 1668.10  
 1691.51 1740.90 2428.15 3064.13 3125.08 3135.41 3212.47  
 3217.35 3225.62 3230.13 3237.51 3244.31 3244.71 3481.88  
 3497.29 3564.50 3581.36 3584.51 3779.83 -313.25 29.12  
 41.76 49.74 74.90 127.27 137.05 163.76 180.91 203.57  
 289.05 295.33 313.65 338.99 388.22 408.12 420.97  
 460.15 471.15 488.17 540.32 559.43 571.87 604.26  
 626.66 656.98 721.95 741.43 792.04 814.08 873.05  
 884.53 920.54 950.90 958.29 972.90 989.80 1006.98  
 1012.41 1022.07 1033.29 1045.12 1061.16 1074.75 1086.21  
 1111.24 1139.06 1150.89 1153.38 1191.88 1209.56 1220.64  
 1242.96 1292.69 1305.91 1324.21 1341.58 1353.11 1365.05  
 1395.81 1411.91 1439.80 1483.63 1511.95 1544.04 1566.77  
 1630.41 1634.13 1659.83 1662.02 1672.46 1691.89 1742.71  
 2452.56 3064.08 3116.94 3133.60 3212.58 3217.50 3225.71  
 3230.21 3237.57 3245.74 3246.22 3482.29 3497.21 3565.65  
 3582.12 3582.72 3782.32

=====  
**IV<sub>6</sub>**  
 # of Negative Frequency: 0  
 Charge: 0 Multiplicity: 1  
 =====  
 59.20 84.52 140.82 168.96 292.90 329.39 402.30 422.26  
 459.06 484.35 551.41 589.52 605.72 627.17 649.17  
 721.78 758.72 790.72 863.57 872.53 922.70 943.75  
 957.02 991.29 1006.57 1016.14 1019.42 1028.06 1042.25  
 1056.90 1074.26 1108.73 1149.38 1188.42 1194.18 1235.56  
 1303.75 1322.38 1344.27 1362.68 1380.38 1399.86 1447.55  
 1484.40 1506.23 1543.72 1661.17 1689.27 1726.37 1768.02  
 3005.98 3090.50 3202.91 3212.02 3218.01 3226.08 3231.19  
 3236.69 3246.22 3652.92

=====  
**S1**  
 # of Negative Frequency: 0  
 Charge: 1 Multiplicity: 2  
 =====  
 77.80 95.23 170.31 256.75 354.02 393.81 432.95 469.07  
 565.59 607.60 644.07 673.83 683.54 795.91 816.99  
 841.83 850.59 906.99 921.23 940.31 986.93 1002.36  
 1024.08 1031.15 1045.41 1059.32 1078.97 1106.88 1129.96  
 1158.61 1192.87 1232.31 1280.50 1325.53 1375.40 1392.02  
 1418.08 1483.65 1501.04 1580.11 1605.87 1612.31 1660.91  
 3237.22 3245.85 3247.73 3255.94 3258.22 3297.49 3302.62  
 3324.40

=====  
**S2**  
 # of Negative Frequency: 0  
 Charge: 1 Multiplicity: 2  
 =====  
 57.50 82.96 128.87 137.81 147.44 207.19 280.47 305.39  
 344.20 374.95 419.86 448.51 496.73 580.26 624.76  
 631.12 691.85 715.86 741.81 790.48 834.11 851.37  
 869.59 877.04 909.26 928.36 956.89 973.02 1002.42  
 1022.84 1023.82 1046.25 1054.65 1072.56 1088.44 1112.53  
 1150.24 1151.69 1186.37 1192.12 1238.49 1250.19 1319.17

1332.67 1341.42 1357.85 1362.32 1443.25 1452.39 1482.92  
1495.15 1520.94 1558.25 1578.15 1640.14 1650.24 1673.17  
3120.73 3207.09 3221.51 3229.31 3235.61 3242.13 3285.52  
3307.70 3427.21 3472.29 3502.39 3596.94

=====  
**S3**

# of Negative Frequency: 0  
Charge: 0 Multiplicity: 2

=====  
47.22 51.49 109.17 134.03 167.06 221.53 304.80 339.04  
363.64 396.56 417.39 494.44 513.33 562.50 610.13  
625.26 663.77 709.38 722.68 758.77 790.29 847.47  
856.36 880.09 897.23 927.41 938.88 975.33 999.58  
1013.66 1019.17 1036.84 1054.31 1071.47 1103.87 1112.93  
1148.70 1183.14 1192.23 1232.89 1253.12 1301.22 1321.75  
1341.10 1352.34 1360.88 1377.68 1443.14 1484.02 1486.71  
1527.24 1560.90 1644.01 1652.70 1669.34 3061.63 3213.85  
3219.34 3228.19 3234.22 3239.27 3268.87 3285.94 3451.23  
3566.13 3608.89

=====  
**SIII<sub>5</sub>-TS**

# of Negative Frequency: 1  
Charge: 0 Multiplicity: 1

=====  
-481.89 31.42 45.26 51.89 58.71 112.86 129.97 166.38  
174.08 197.21 247.83 259.82 281.74 331.73 342.33  
361.54 377.25 393.47 421.43 432.61 507.42 518.25  
547.05 609.89 627.95 653.09 662.96 709.67 722.11  
744.50 805.24 834.93 877.06 923.13 950.38 999.94  
1006.38 1014.48 1021.59 1034.26 1040.56 1047.12 1048.50  
1062.72 1098.38 1100.79 1133.57 1146.55 1179.98 1206.61  
1228.21 1249.78 1293.26 1307.11 1323.70 1334.64 1344.61  
1356.96 1414.85 1478.92 1489.58 1498.13 1539.89 1556.42  
1588.36 1614.16 1631.52 1649.20 1656.99 1663.47 1687.52  
2096.01 3131.07 3185.87 3205.05 3208.90 3217.69 3221.82  
3229.17 3232.60 3276.08 3467.59 3484.87 3537.64 3542.42  
3554.09 3835.94

=====  
**II<sub>5</sub>''**

# of Negative Frequency: 0  
Charge: 1 Multiplicity: 1

=====  
40.43 75.96 130.15 148.45 198.18 256.30 290.48 330.75  
365.27 414.22 424.52 448.25 461.26 519.92 569.78  
590.72 626.23 663.35 708.99 720.24 773.69 790.00  
855.85 864.94 874.79 959.85 977.22 995.29 1011.62  
1024.66 1028.62 1046.18 1052.54 1061.13 1065.58 1108.74

1147.51 1153.11 1160.43 1186.95 1235.07 1251.83 1263.63  
1301.49 1311.39 1330.50 1363.98 1371.46 1388.90 1425.31  
1426.52 1443.34 1487.38 1494.76 1545.71 1624.22 1668.77  
1694.77 1748.17 3098.88 3140.72 3174.87 3219.92 3224.45  
3230.90 3236.84 3242.92 3285.56 3418.93 3499.84 3588.33  
3819.13

=====  
**II<sub>6</sub>''**

# of Negative Frequency: 0  
Charge: 1 Multiplicity: 1

=====  
51.06 90.06 129.24 178.03 196.95 279.20 326.58 356.94  
420.11 424.57 455.69 467.17 491.27 529.92 536.15  
558.85 623.17 628.04 711.32 720.38 788.36 842.49  
873.39 907.38 918.25 957.05 965.25 990.44 1011.98  
1022.51 1044.88 1048.69 1060.23 1069.38 1090.22 1109.43  
1150.34 1187.84 1193.38 1218.61 1244.69 1273.71 1291.59  
1308.07 1329.21 1347.20 1361.84 1385.68 1397.67 1412.47  
1438.88 1487.15 1505.53 1543.81 1544.65 1599.10 1665.72  
1695.42 1762.50 3077.22 3136.45 3147.27 3214.66 3220.24  
3227.20 3232.14 3238.73 3257.72 3365.51 3467.49 3581.41  
3817.20

=====  
**N<sub>2</sub>H<sub>4</sub>**

# of Negative Frequency: 0  
Charge: 0 Multiplicity: 1

=====  
416.40 896.79 1035.36 1151.25 1312.08 1357.39 1646.73  
1655.92 3483.82 3489.22 3573.79 3582.18

=====  
**N<sub>2</sub>H<sub>5</sub><sup>+</sup>**

# of Negative Frequency: 0  
Charge: 1 Multiplicity: 1

=====  
321.92 972.60 1073.72 1112.87 1234.34 1448.12 1554.03  
1608.33 1613.37 1654.02 3413.47 3495.72 3514.76 3517.60  
3599.20

=====  
**H<sub>2</sub>O**

# of Negative Frequency: 0  
Charge: 0 Multiplicity: 1

=====  
1611.62 3844.15 3920.66

## X. References

- 1 Pangborn, A. B., Giardello, M. A., Grubbs, R. H., Rosen, R. K. & Timmers, F. J. Safe and Convenient Procedure for Solvent Purification. *Organometallics* **15**, 1518–1520 (1996). <https://doi.org/10.1021/om9503712>
- 2 Hubschle, C. B., Sheldrick, G. M. & Dittrich, B. ShelXle: a Qt graphical user interface for SHELXL. *J. Appl. Crystallogr.* **44**, 1281–1284 (2011). <https://doi.org/doi:10.1107/S0021889811043202>
- 3 Sheldrick, G. Crystal structure refinement with SHELXL. *Acta Crystallogr., C Struct. Chem.* **71**, 3–8 (2015). <https://doi.org/doi:10.1107/S2053229614024218>
- 4 Kim, D. *et al.* Photocatalytic furan-to-pyrrole conversion. *Science* **386**, 99–105 (2024). <https://doi.org/10.1126/science.adq6245>
- 5 Rieke, R. D., Suh, Y. & Kim, S.-H. Heteroaryl manganese reagents: direct preparation and reactivity studies. *Tetrahedron Lett.* **46**, 5961–5964 (2005). <https://doi.org/https://doi.org/10.1016/j.tetlet.2005.06.092>
- 6 Tofi, M., Georgiou, T., Montagnon, T. & Vassilikogiannakis, G. Regioselective Ortho Lithiation of 3-Aryl and 3-Styryl Furans. *Org. Lett.* **7**, 3347–3350 (2005). <https://doi.org/10.1021/ol051205l>
- 7 Li, J. J. *et al.* Synthesis and structure–Activity relationship of 2-amino-3-heteroaryl-quinoxalines as non-peptide, small-Molecule antagonists for interleukin-8 receptor. *Bioorg. Med. Chem.* **11**, 3777–3790 (2003). [https://doi.org/https://doi.org/10.1016/S0968-0896\(03\)00399-7](https://doi.org/https://doi.org/10.1016/S0968-0896(03)00399-7)
- 8 Wu, X. *et al.* Alkoxide-Catalyzed Hydrosilylation of Cyclic Imides to Isoquinolines via Tandem Reduction and Rearrangement. *Org. Lett.* **20**, 5610–5613 (2018). <https://doi.org/10.1021/acs.orglett.8b02287>
- 9 Yang, Y. & N.C. Wong, H. Regiospecific synthesis of 3,4-disubstituted furans and 3-substituted furans using 3,4-Bis(tri-n-butylstannyl)furan and 3-(tri-n-butylstannyl)f. *Tetrahedron* **50**, 9583–9608 (1994). [https://doi.org/https://doi.org/10.1016/S0040-4020\(01\)85528-9](https://doi.org/https://doi.org/10.1016/S0040-4020(01)85528-9)
- 10 Cao, Z., Wang, M., Gao, H., Li, L. & Ren, S. Porous Organic Polymers via Diels–Alder Reaction for the Removal of Cr(VI) from Aqueous Solutions. *ACS Macro Lett.* **11**, 447–451 (2022). <https://doi.org/10.1021/acsmacrolett.2c00052>
- 11 Wang, H. *et al.* Dearomative ring expansion of thiophenes by bicyclobutane insertion. *Science* **381**, 75–81 (2023). <https://doi.org/10.1126/science.adh9737>
- 12 Fukumoto, Y., Tamura, Y., Iyori, Y. & Chatani, N. Conversion of 3,3,3-Trisubstituted Prop-1-yne with tert-Butylhydrazine into 3,3,3-Trisubstituted Propionitriles Catalyzed by TpRh(C<sub>2</sub>H<sub>4</sub>)<sub>2</sub>/P(2-furyl)<sub>3</sub>. *J. Org. Chem.* **81**, 3161–3167 (2016). <https://doi.org/10.1021/acs.joc.6b00116>
- 13 Thondur, J. R., Gowda, P. S., Sharada, D. S. & Satyanarayana, G. Electrochemical Regioselective C-3 Alkoxyacylation of 2H-Indazoles. *J. Org. Chem.* **90**, 7435–7448 (2025). <https://doi.org/10.1021/acs.joc.5c00785>
- 14 Zhang, J. *et al.* A Variation of the Fischer Indolization Involving Condensation of Quinone Monoketals and Aliphatic Hydrazines. *Angew. Chem. Int. Ed.* **52**, 1753–1757 (2013). <https://doi.org/https://doi.org/10.1002/anie.201207533>
- 15 Mutungi, M. M., Ho, C. C., Bissember, A. C. & Smith, J. A. Facilitating the Isolation of Polar Natural Products: Mild 1,1'-Carbonyldiimidazole-Enabled Method for Derivatization of Acids and Alcohols. *Eur. J. Org. Chem.* **28**, e202500231 (2025). <https://doi.org/https://doi.org/10.1002/ejoc.202500231>
- 16 Xu, J. *et al.* Electrochemical deoxygenative amination of stabilized alkyl radicals from activated alcohols. *Nature Communications* **15**, 6116 (2024). <https://doi.org/10.1038/s41467-024-50596-3>

- 17 Do, H.-Q., Khan, R. M. K. & Daugulis, O. A General Method for Copper-Catalyzed Arylation of Arene C–H Bonds. *J. Am. Chem. Soc.* **130**, 15185–15192 (2008). <https://doi.org/10.1021/ja805688p>
- 18 Choi, W., Jang, A. & Hong, S. Pyridine-to-Pyridazine Skeletal Editing. *J. Am. Chem. Soc.* **147**, 42042–42050 (2025). <https://doi.org/10.1021/jacs.5c15601>
- 19 Al Dulayymi, A. R. & Baird, M. S. Pyridazines by addition of diazoalkanes to 1-bromo- and 1,2-dibromocyclopropenes. *Tetrahedron* **54**, 12897–12906 (1998). [https://doi.org/https://doi.org/10.1016/S0040-4020\(98\)00781-9](https://doi.org/https://doi.org/10.1016/S0040-4020(98)00781-9)
- 20 Wang, W., Meng, W. & Du, H. B(C<sub>6</sub>F<sub>5</sub>)<sub>3</sub>-catalyzed metal-free hydrogenation of 3,6-diarylpyridazines. *Dalton Trans.* **45**, 5945–5948 (2016). <https://doi.org/10.1039/C5DT03872C>
- 21 Ledovskaya, M. S., Polynski, M. V. & Ananikov, V. P. One-Pot and Two-Chamber Methodologies for Using Acetylene Surrogates in the Synthesis of Pyridazines and Their D-Labeled Derivatives. *Chem. Asian J.* **16**, 2286–2297 (2021). <https://doi.org/https://doi.org/10.1002/asia.202100562>
- 22 Kinjo, R., Donnadiu, B. & Bertrand, G. Gold-Catalyzed Hydroamination of Alkynes and Allenes with Parent Hydrazine. *Angew. Chem. Int. Ed.* **50**, 5560–5563 (2011). <https://doi.org/https://doi.org/10.1002/anie.201100740>
- 23 Pridmore, S. J., Slatford, P. A., Taylor, J. E., Whittlesey, M. K. & Williams, J. M. J. Synthesis of furans, pyrroles and pyridazines by a ruthenium-catalysed isomerisation of alkynediols and in situ cyclisation. *Tetrahedron* **65**, 8981–8986 (2009). <https://doi.org/https://doi.org/10.1016/j.tet.2009.06.108>
- 24 Parr, R. G. in *Horizons of Quantum Chemistry*. (eds Kenichi Fukui & Bernard Pullman) 5–15 (Springer Netherlands).
- 25 Neese, F., Wennmohs, F., Becker, U. & Riplinger, C. The ORCA quantum chemistry program package. *J. Chem. Phys.* **152**, 224108 (2020). <https://doi.org/10.1063/5.0004608>
- 26 Neese, F. Software Update: The ORCA Program System—Version 6.0. *WIREs Comput. Mol. Sci.* **15**, e70019 (2025). <https://doi.org/https://doi.org/10.1002/wcms.70019>
- 27 Zhao, Y. & Truhlar, D. G. The M06 suite of density functionals for main group thermochemistry, thermochemical kinetics, noncovalent interactions, excited states, and transition elements: two new functionals and systematic testing of four M06-class functionals and 12 other functionals. *Theor. Chem. Acc.* **120**, 215–241 (2008). <https://doi.org/10.1007/s00214-007-0310-x>
- 28 Weigend, F. & Ahlrichs, R. Balanced basis sets of split valence, triple zeta valence and quadruple zeta valence quality for H to Rn: Design and assessment of accuracy. *Phys. Chem. Chem. Phys.* **7**, 3297–3305 (2005). <https://doi.org/10.1039/B508541A>
- 29 Weigend, F. Accurate Coulomb-fitting basis sets for H to Rn. *Phys. Chem. Chem. Phys.* **8**, 1057–1065 (2006). <https://doi.org/10.1039/B515623H>
- 30 Cossi, M., Rega, N., Scalmani, G. & Barone, V. Energies, structures, and electronic properties of molecules in solution with the C-PCM solvation model. *J. Comput. Chem.* **24**, 669–681 (2003). <https://doi.org/https://doi.org/10.1002/jcc.10189>
